# Supplementary material (part 4 of 5)
Source: ML conference proceedings conference paper supplement (https://openreview.net/forum?id=iiQ5e8EcsBt)

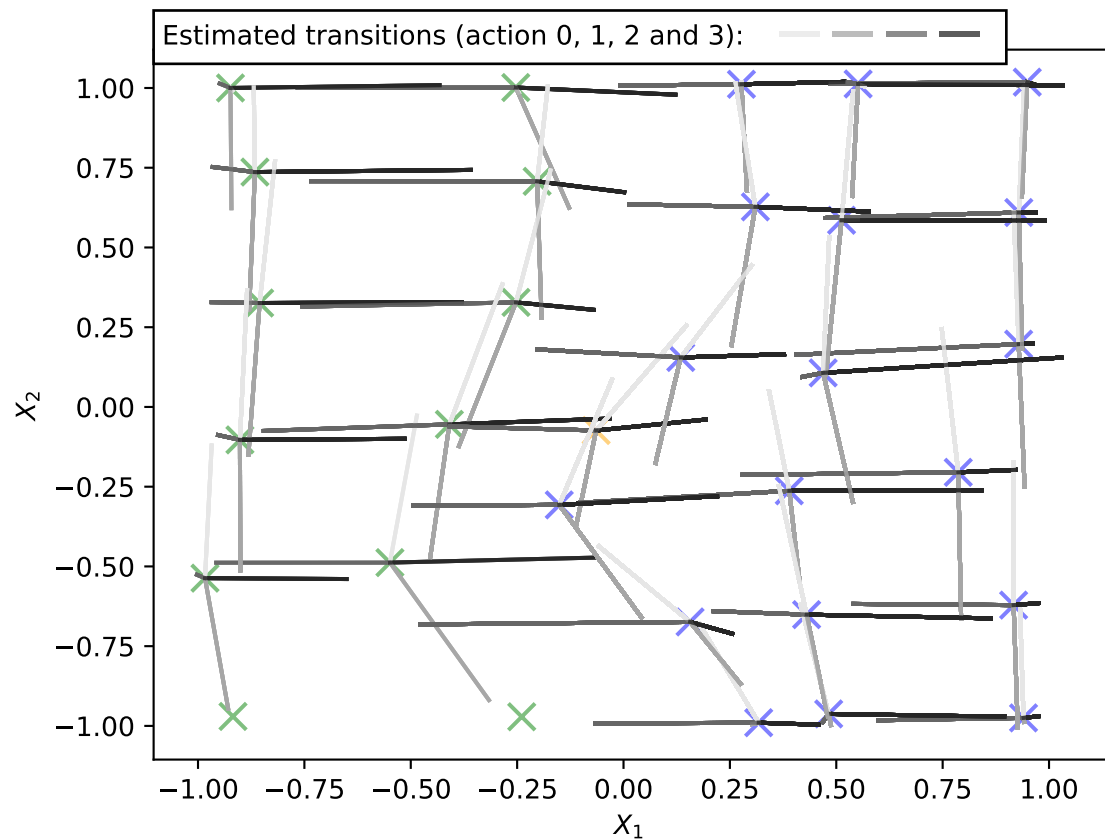

Supplement: supplementary_material [file attachment]

Estimated transitions (action 0, 1, 2 and 3):

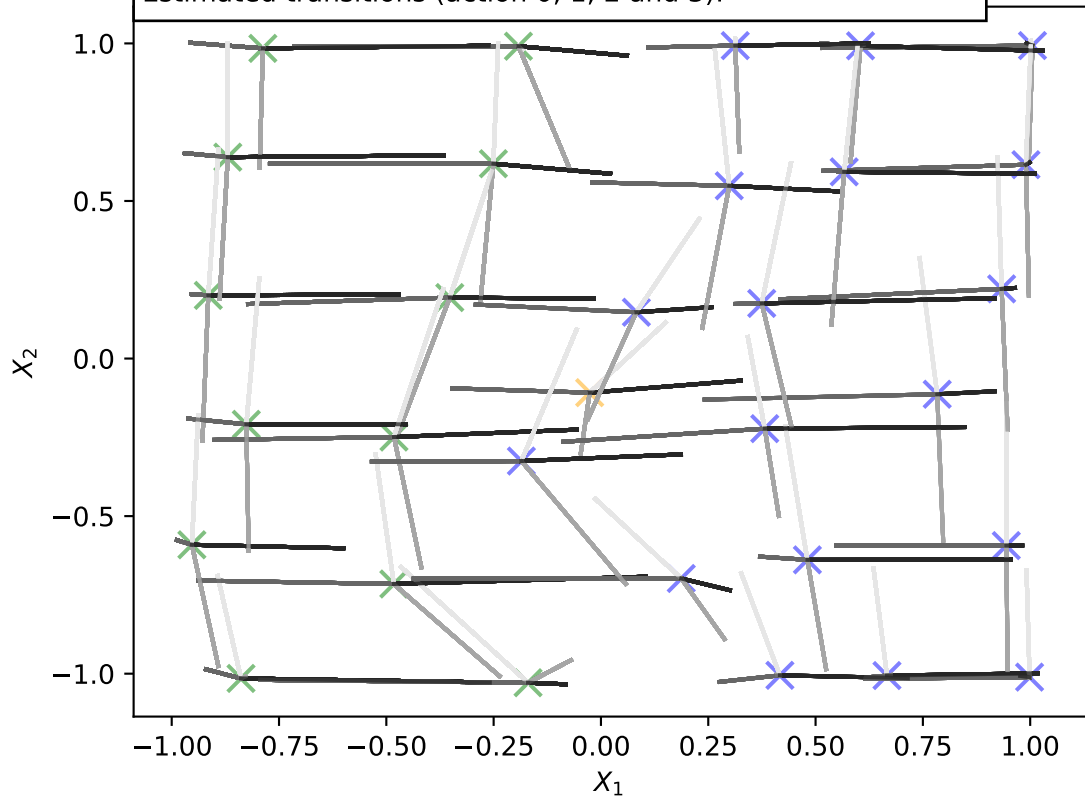

Supplement: supplementary_material [file attachment]

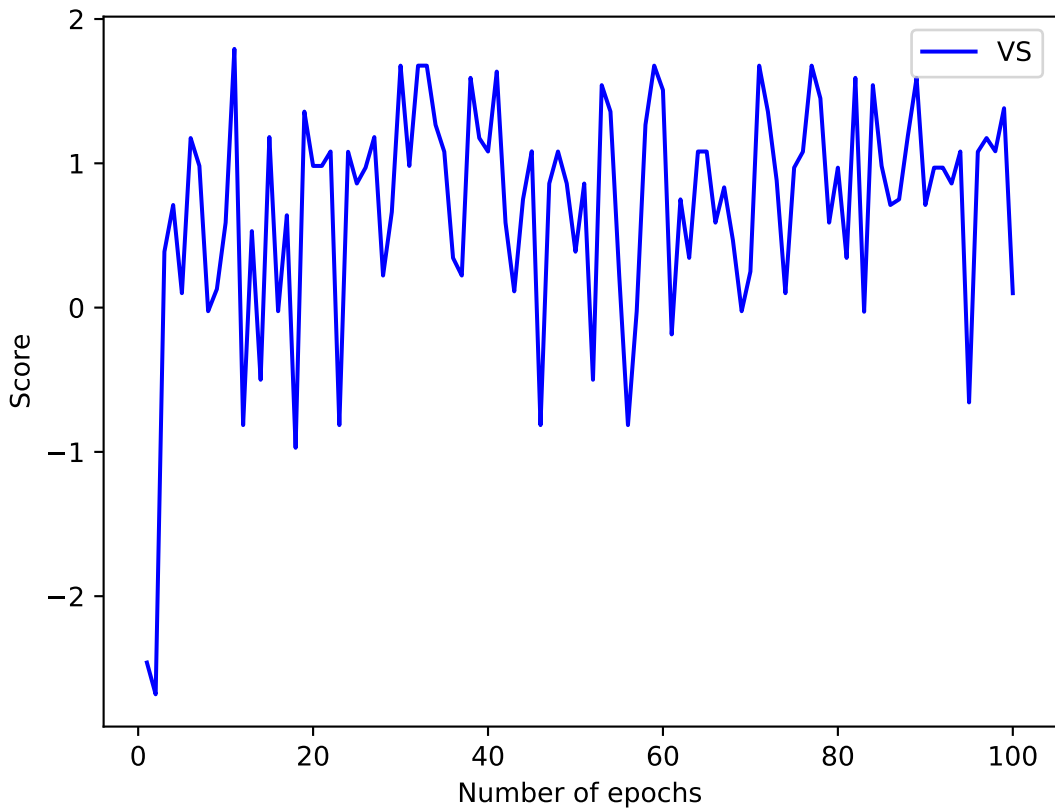

Supplement: supplementary_material [file attachment]

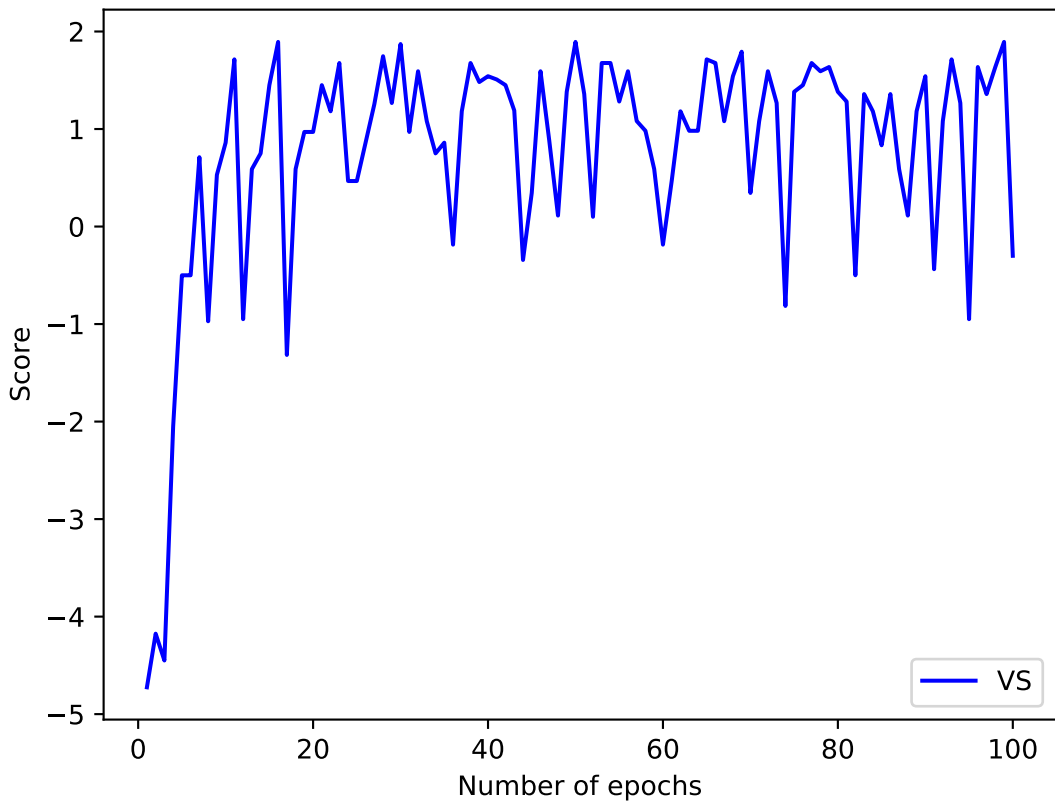

Supplement: supplementary_material [file attachment]

Estimated transitions (action 0, 1, 2 and 3):

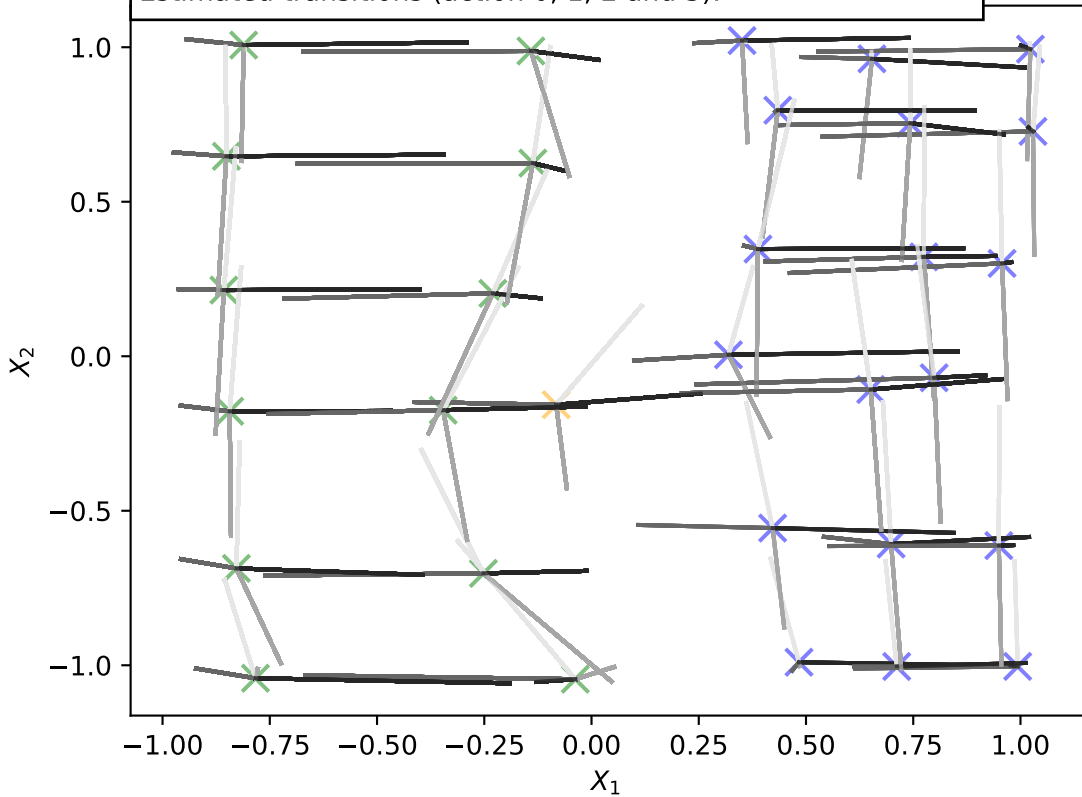

Supplement: supplementary_material [file attachment]

Estimated transitions (action 0, 1, 2 and 3):

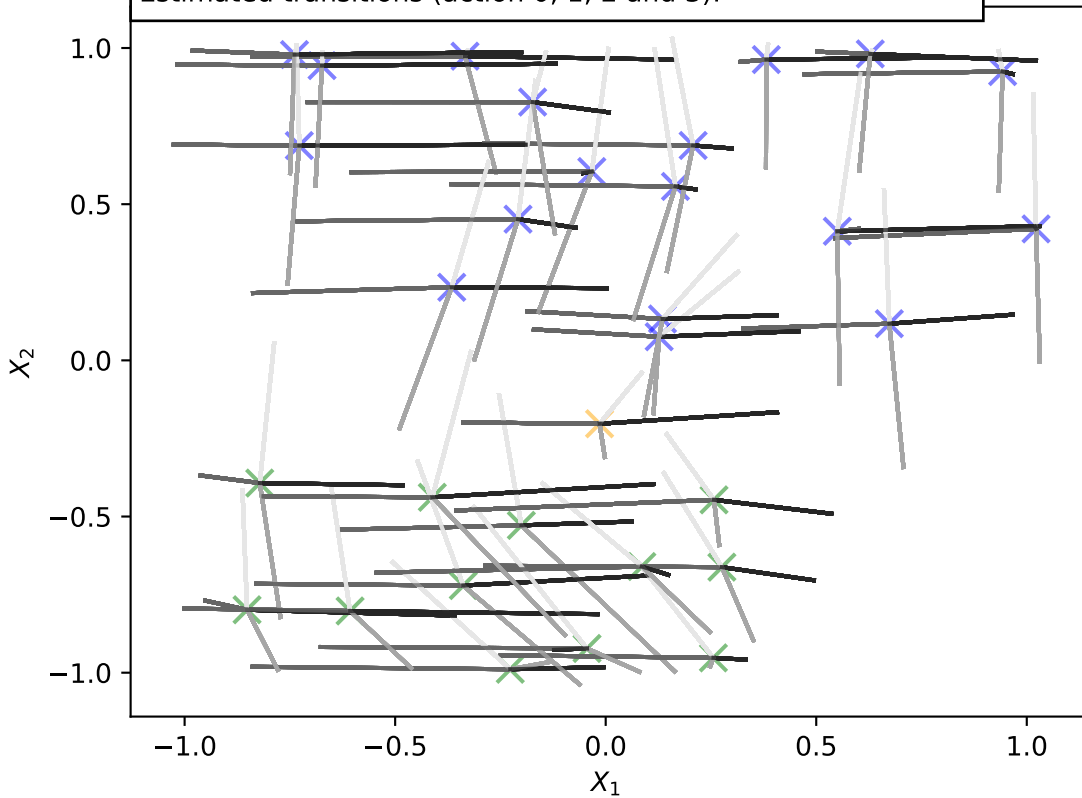

Supplement: supplementary_material [file attachment]

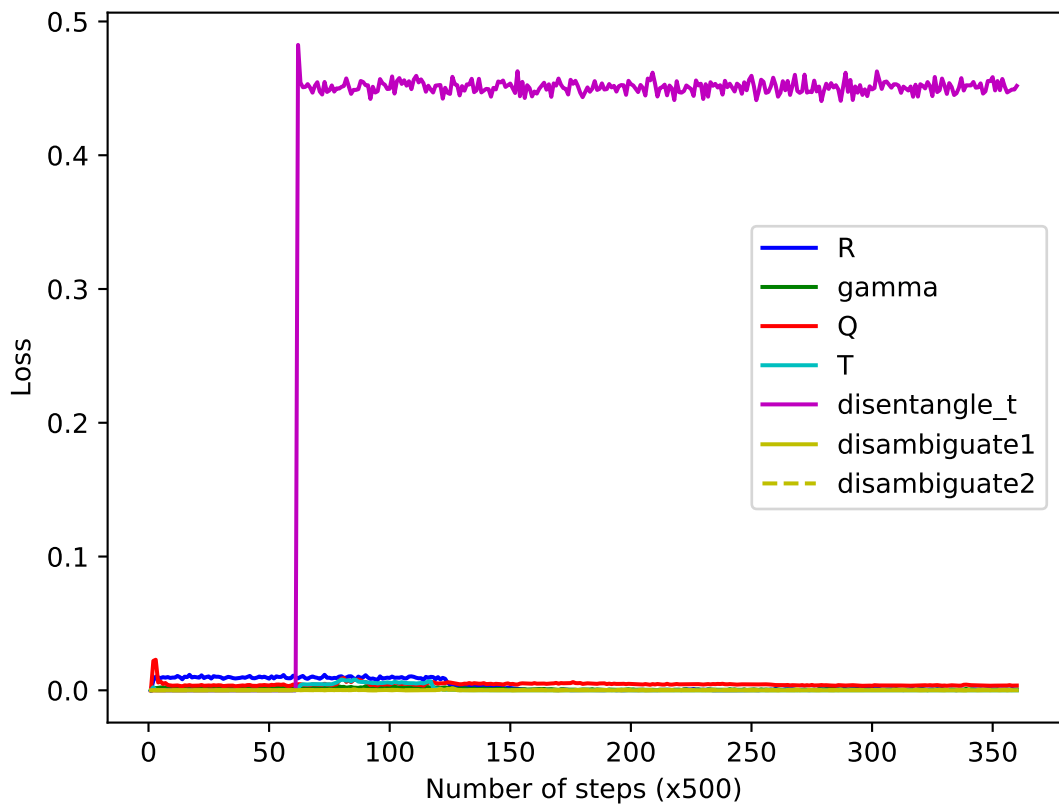

Supplement: supplementary_material [file attachment]

Estimated transitions (action 0, 1, 2 and 3):

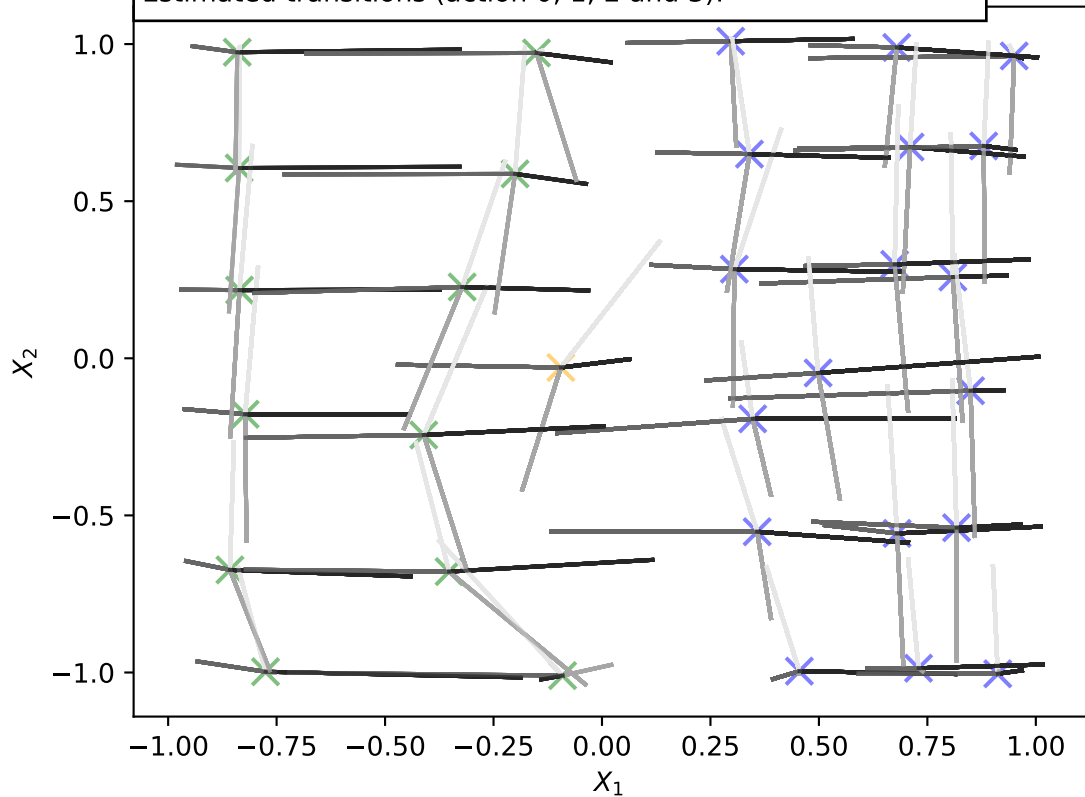

Supplement: supplementary_material [file attachment]

Estimated transitions (action 0, 1, 2 and 3):

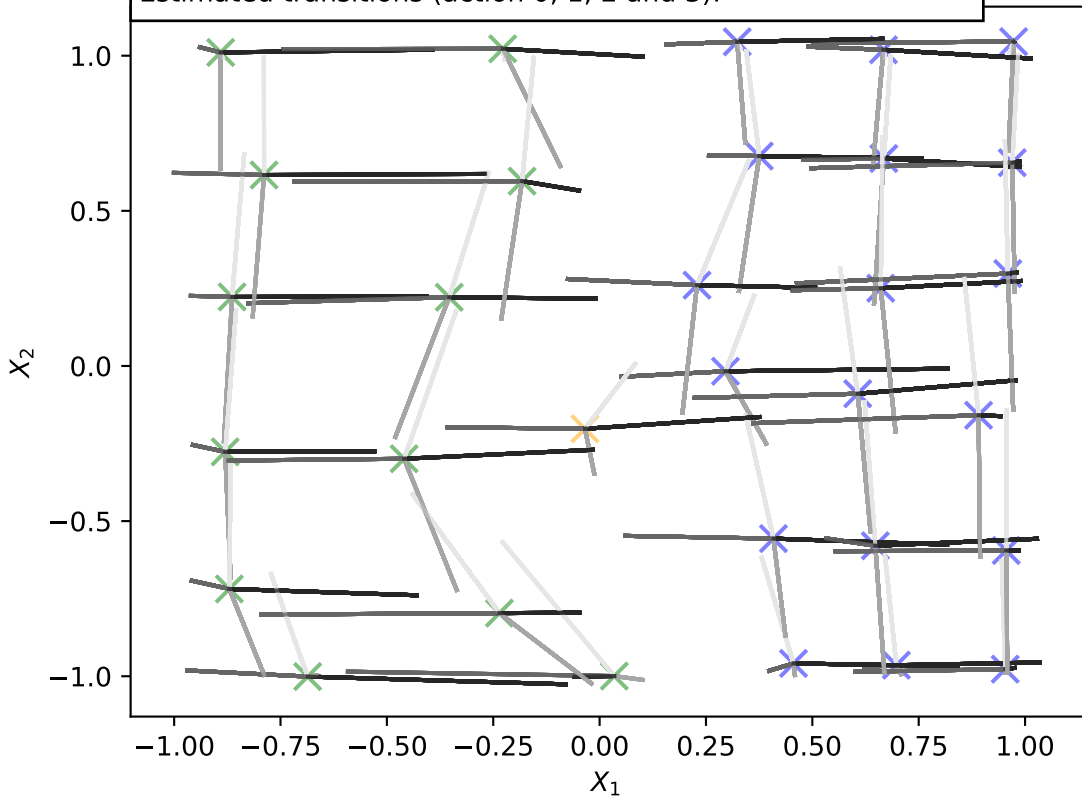

Supplement: supplementary_material [file attachment]

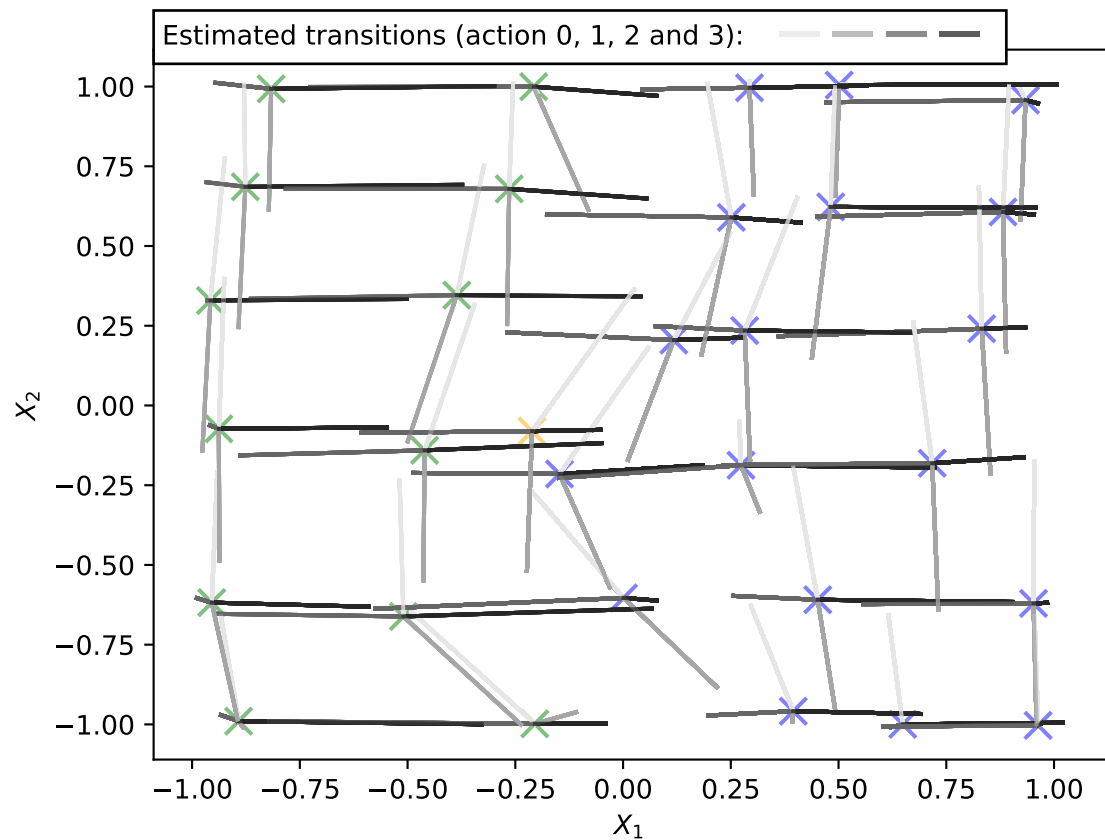

Supplement: supplementary_material [file attachment]

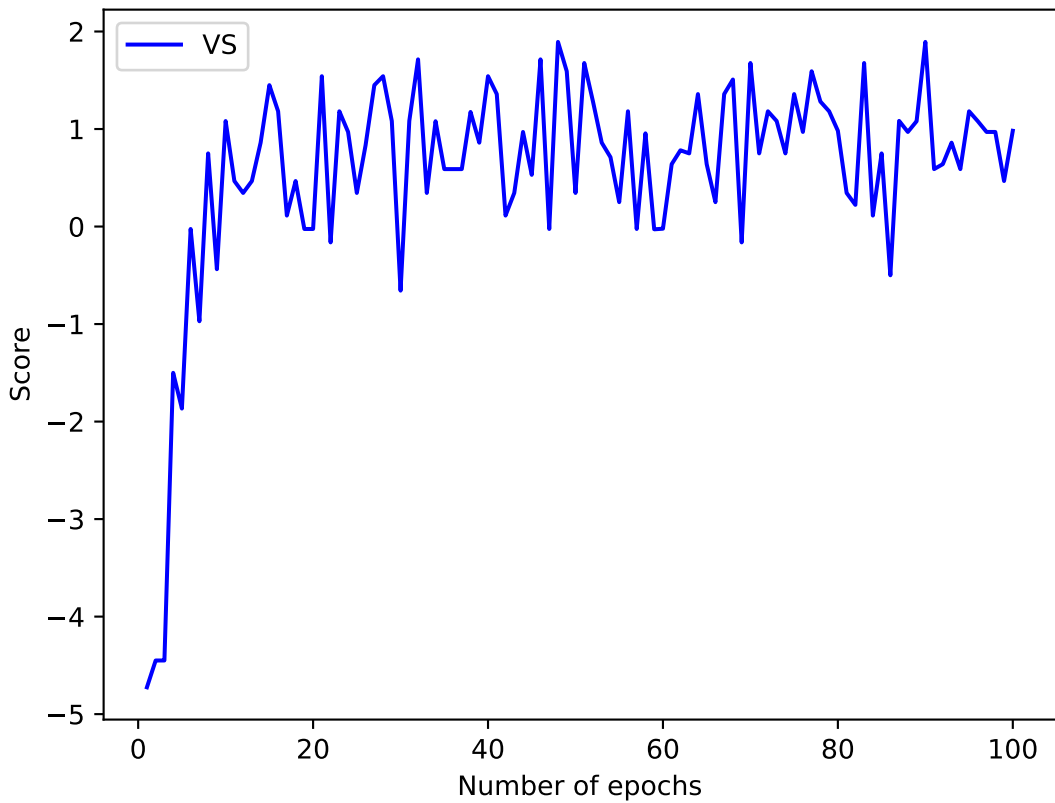

Supplement: supplementary_material [file attachment]

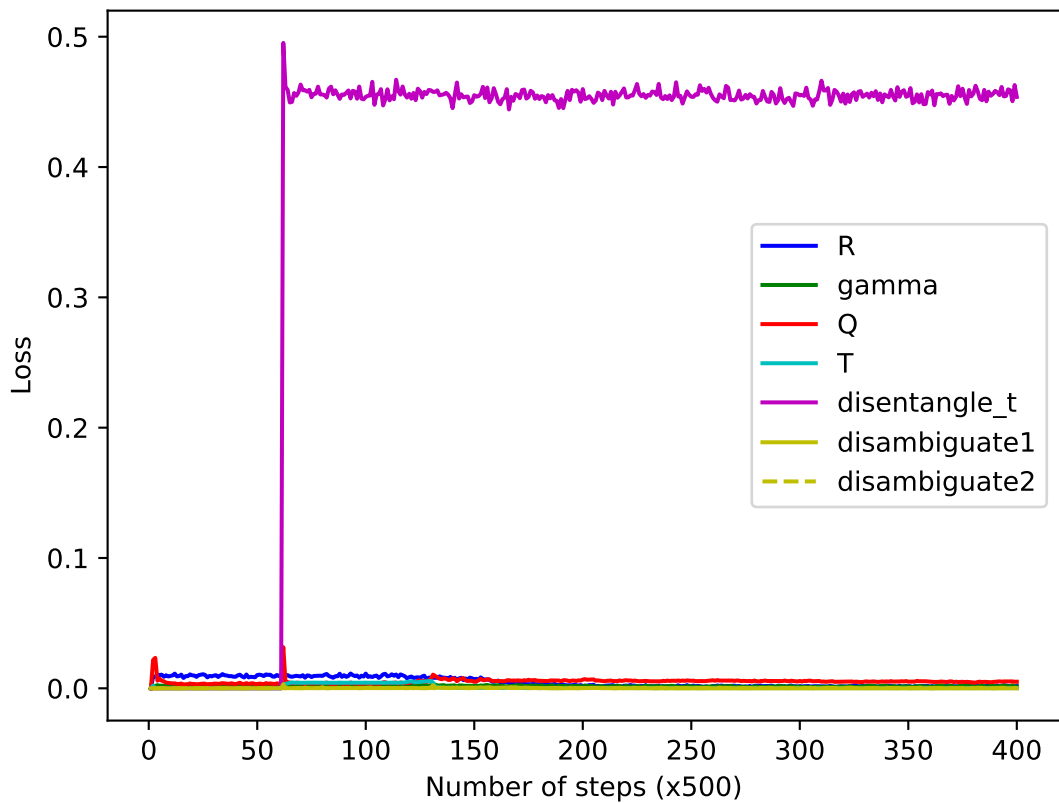

Supplement: supplementary_material [file attachment]

Estimated transitions (action 0, 1, 2 and 3):

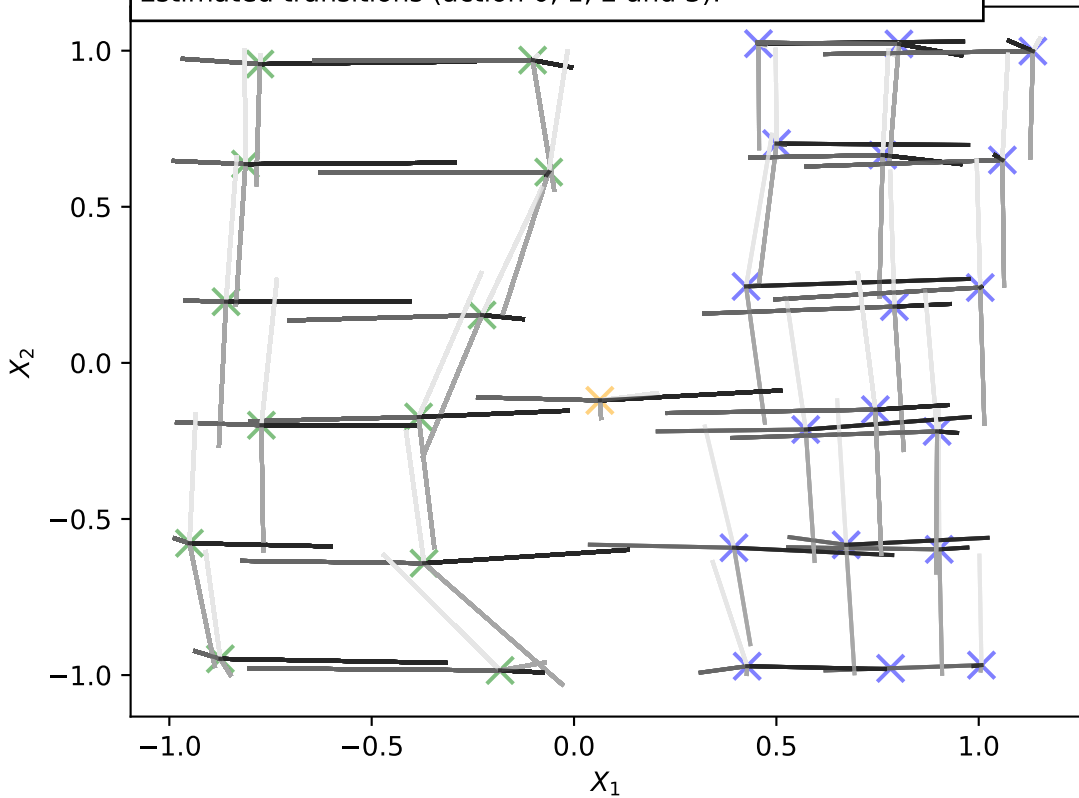

Supplement: supplementary_material [file attachment]

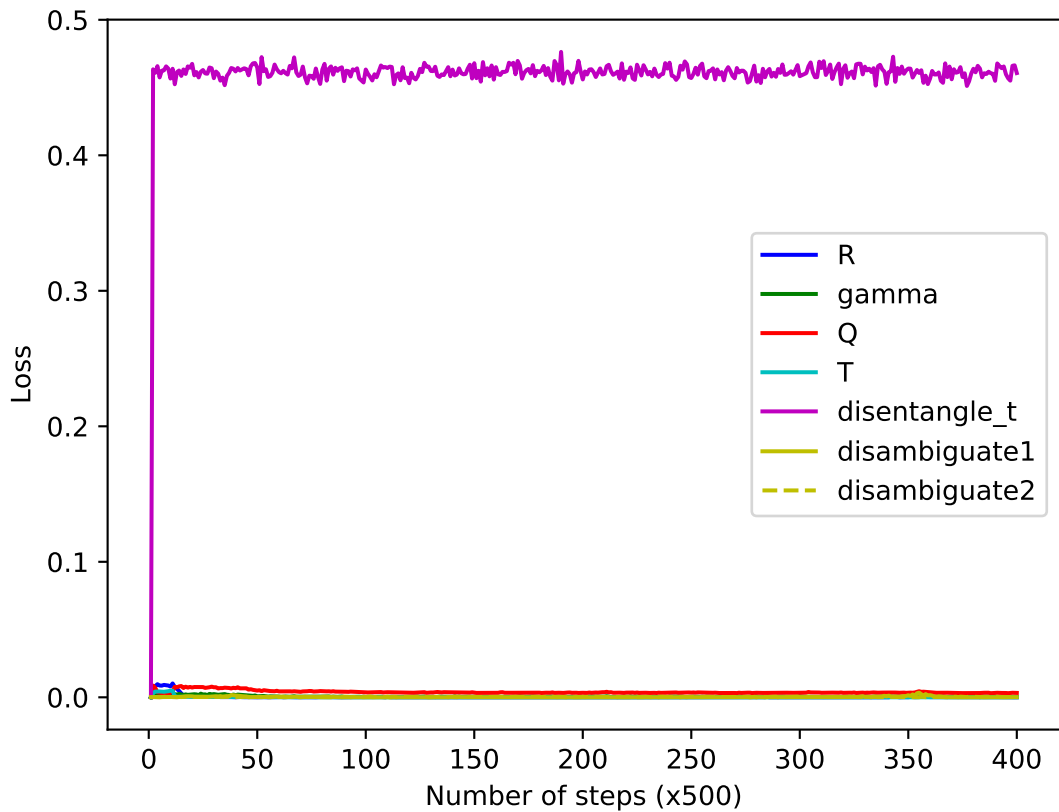

Supplement: supplementary_material [file attachment]

Estimated transitions (action 0, 1, 2 and 3):

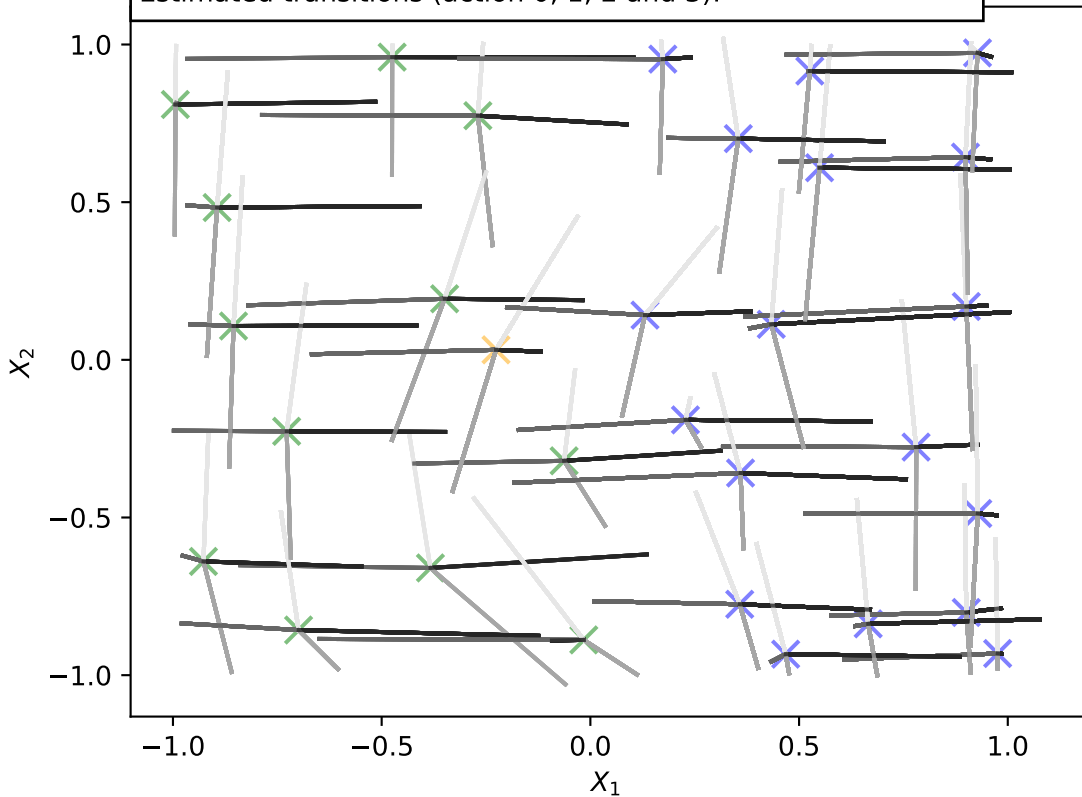

Supplement: supplementary_material [file attachment]

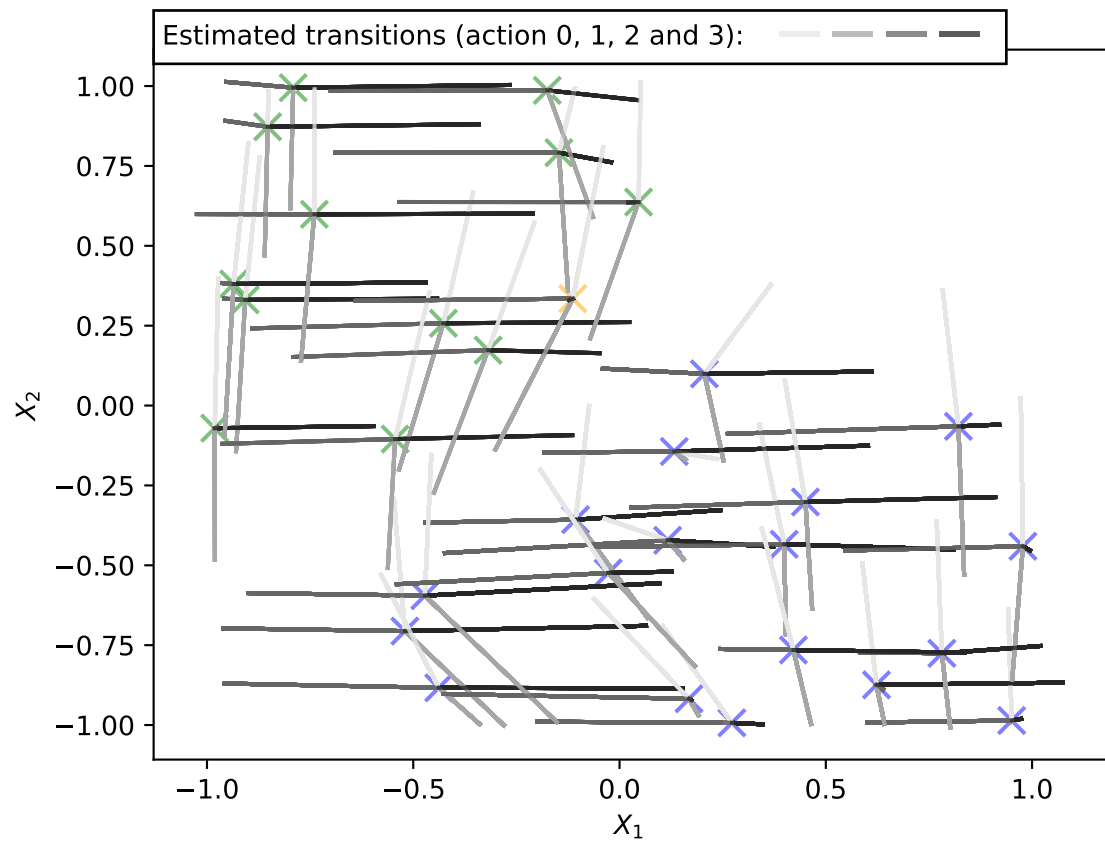

Supplement: supplementary_material [file attachment]

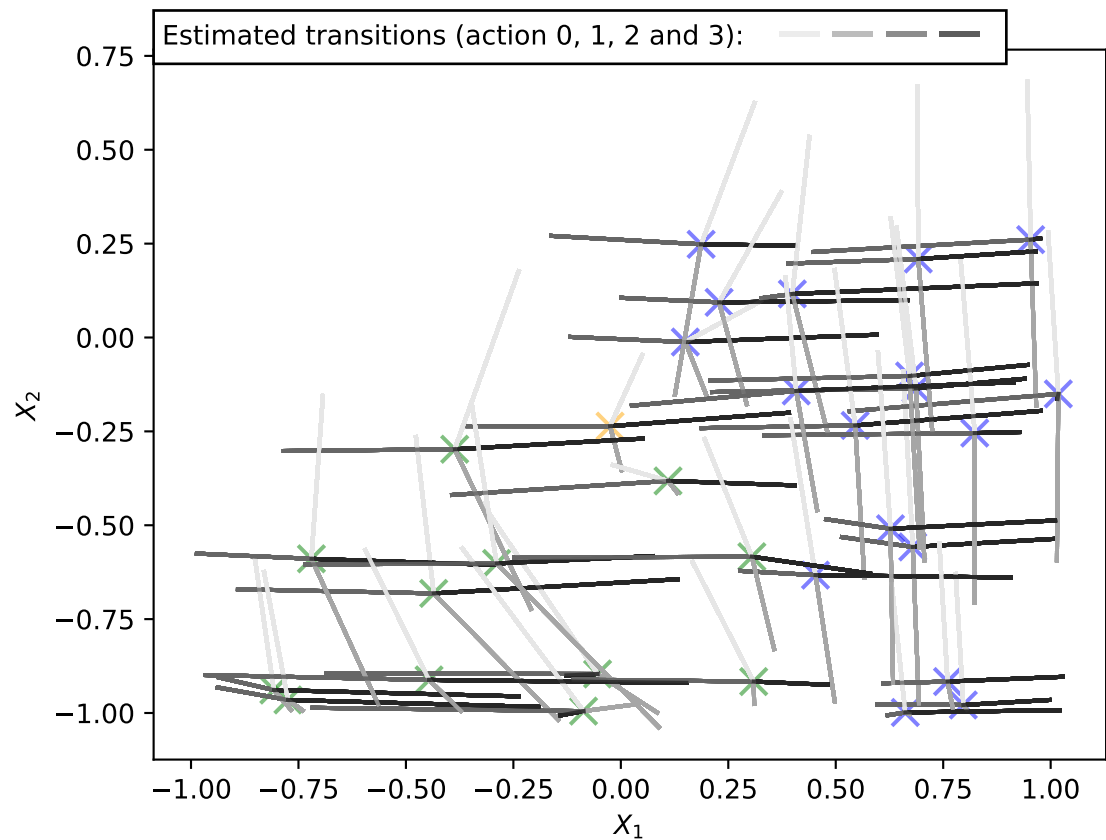

Supplement: supplementary_material [file attachment]

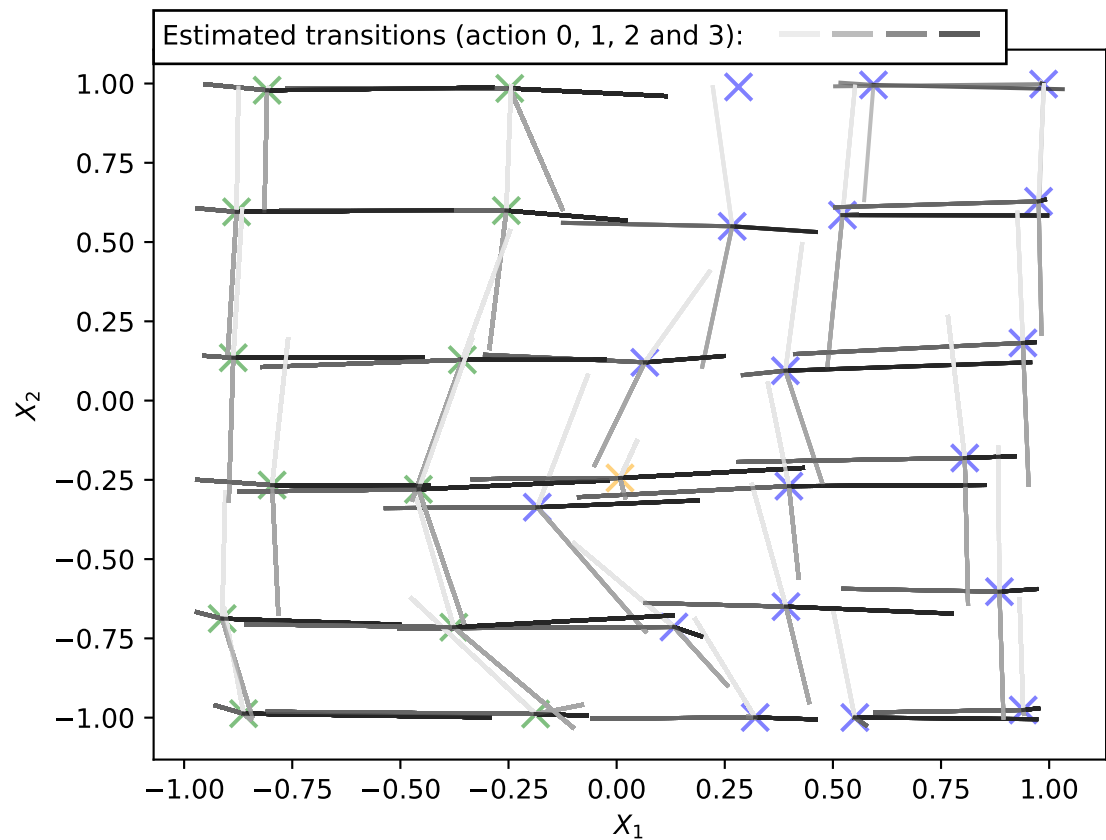

Supplement: supplementary_material [file attachment]

Estimated transitions (action 0, 1, 2 and 3):

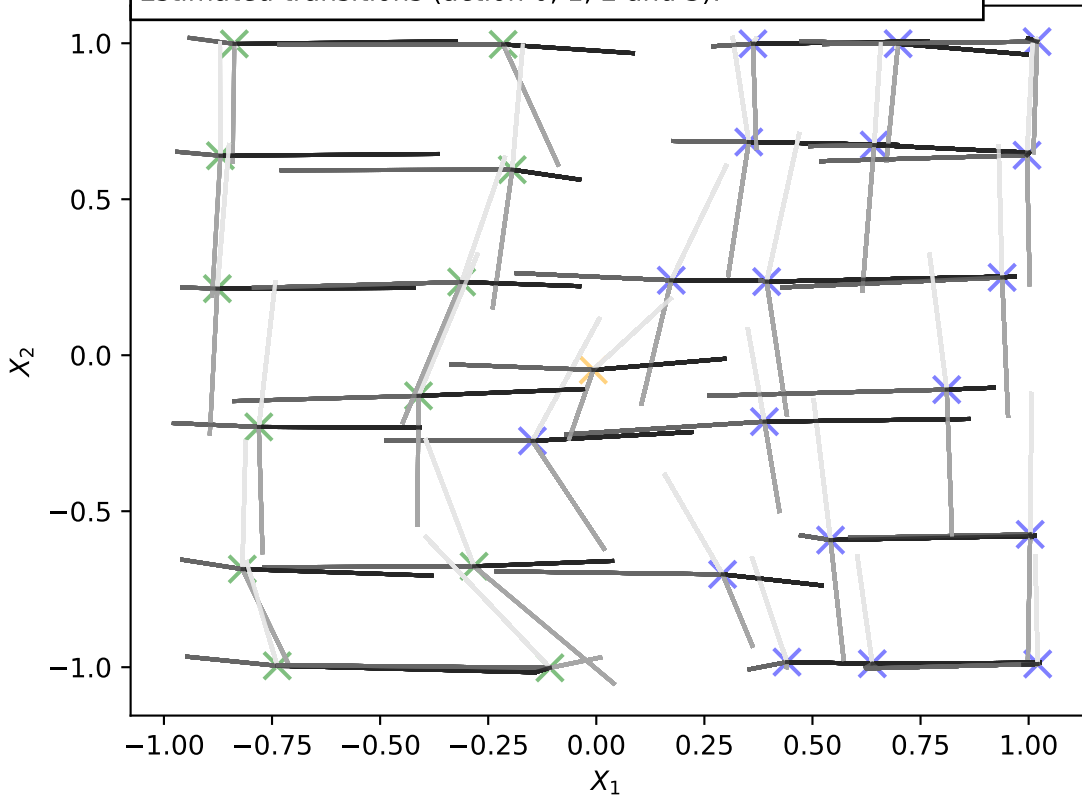

Supplement: supplementary_material [file attachment]

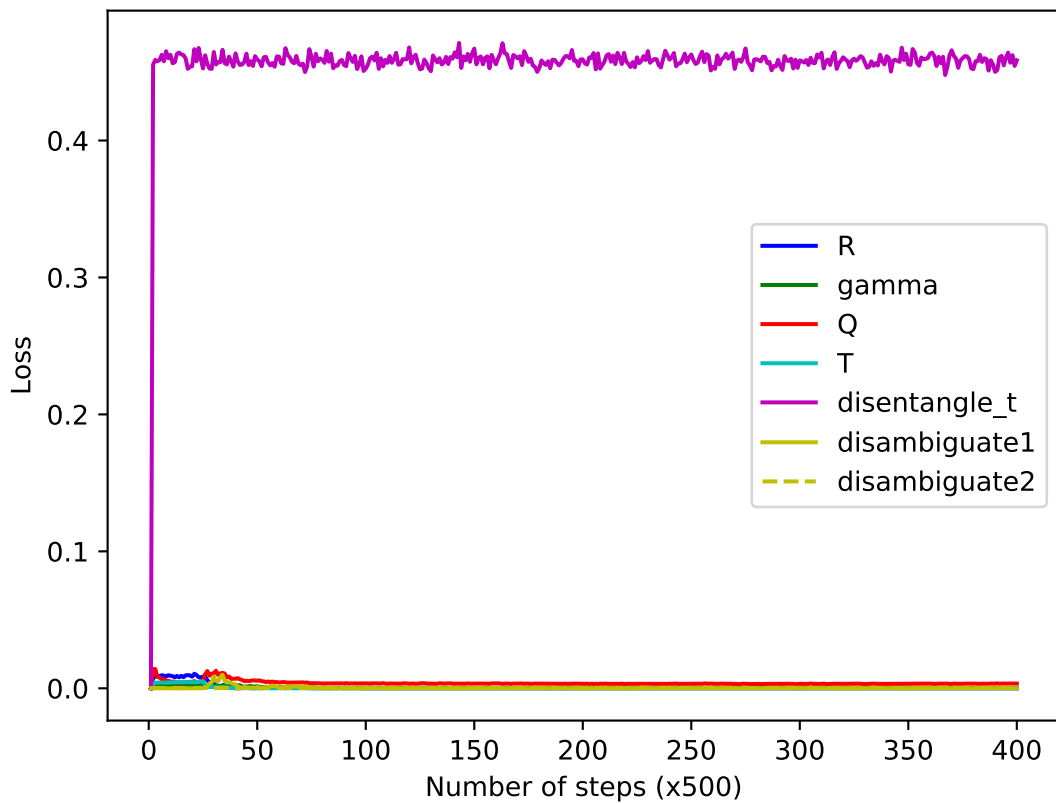

Supplement: supplementary_material [file attachment]

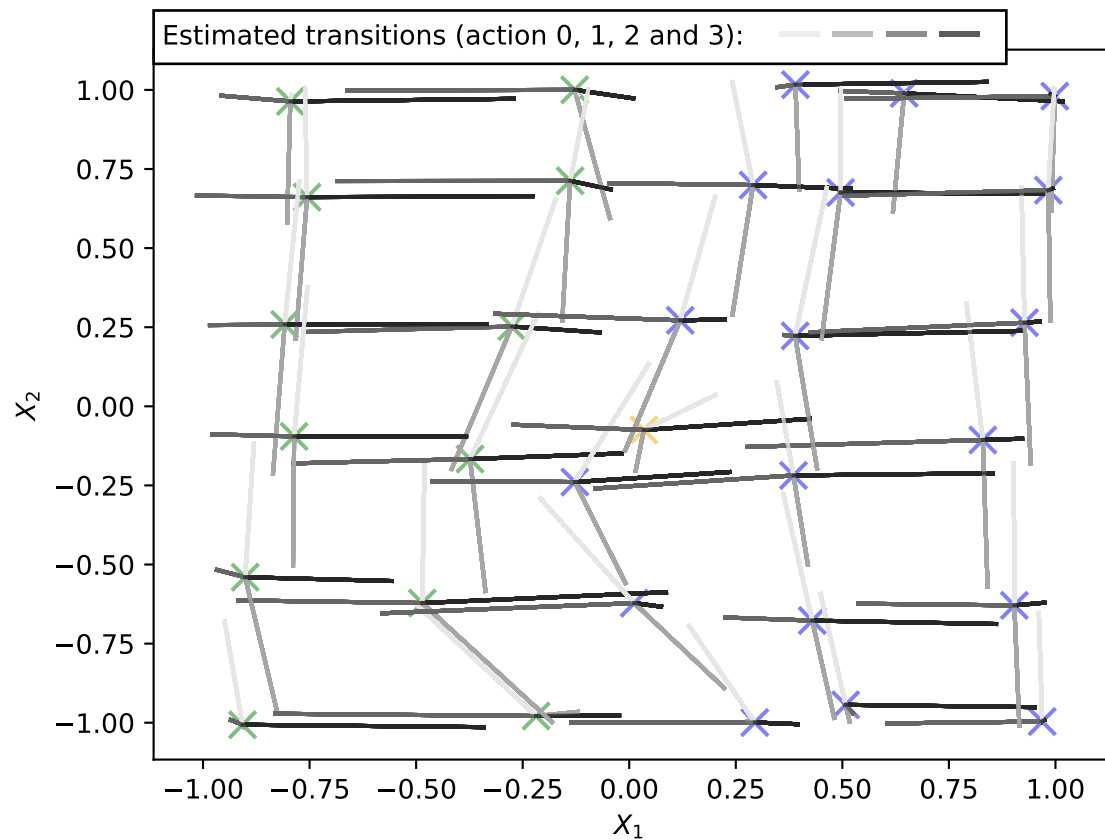

Supplement: supplementary_material [file attachment]

Estimated transitions (action 0, 1, 2 and 3):

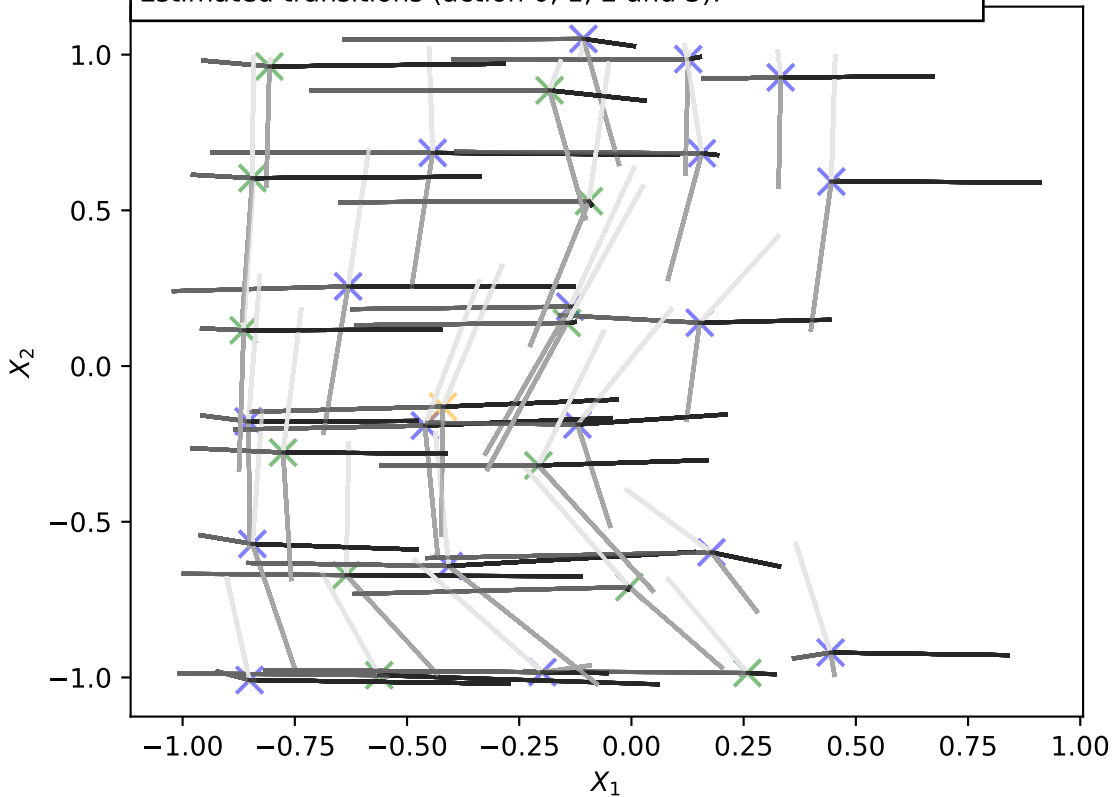

Supplement: supplementary_material [file attachment]

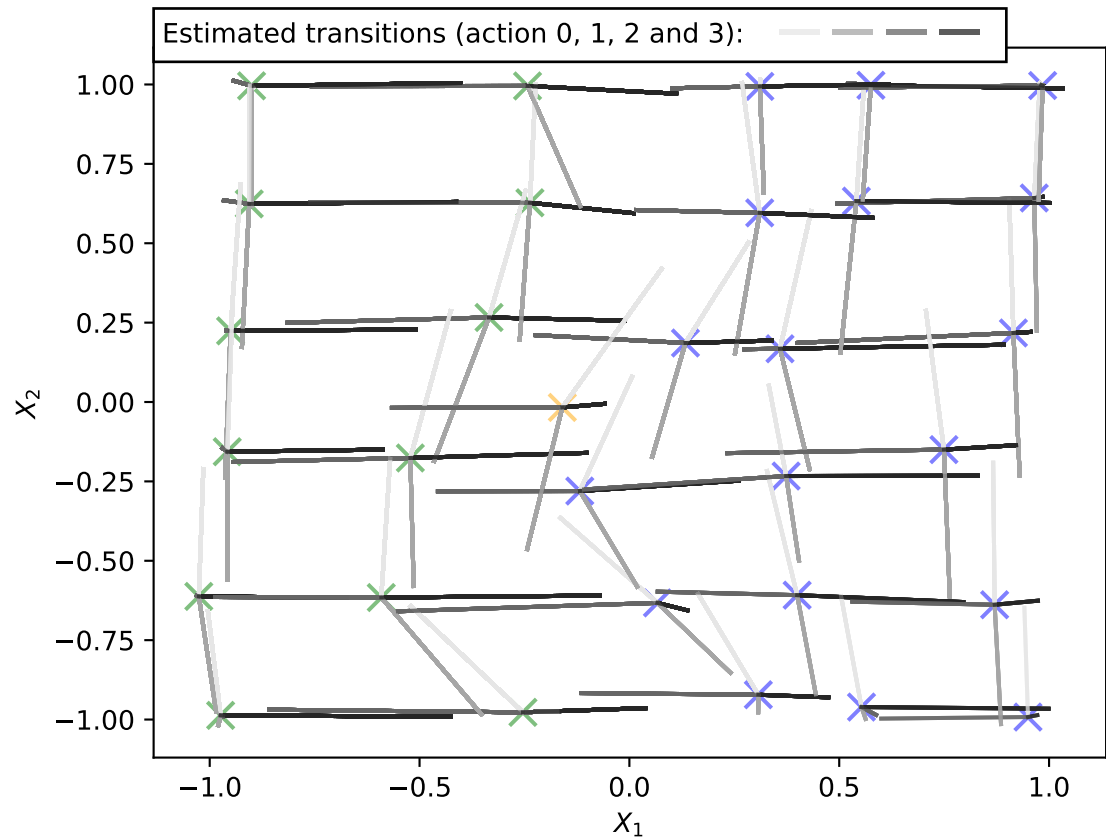

Supplement: supplementary_material [file attachment]

Estimated transitions (action 0, 1, 2 and 3):

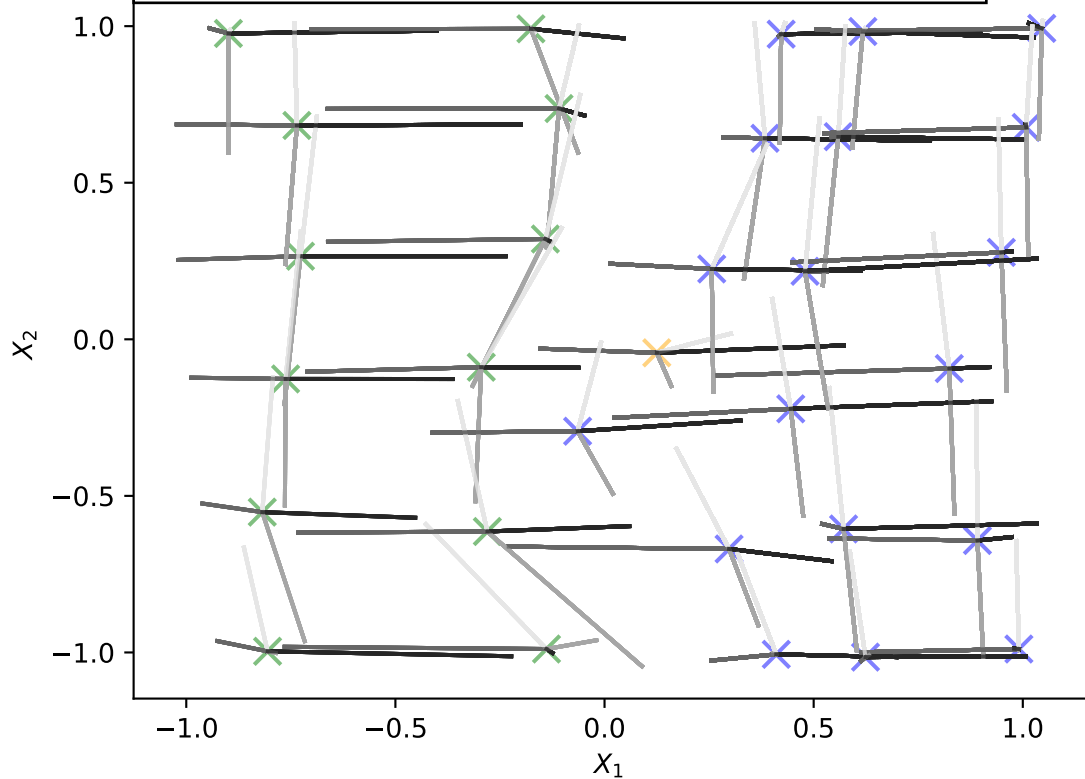

Supplement: supplementary_material [file attachment]

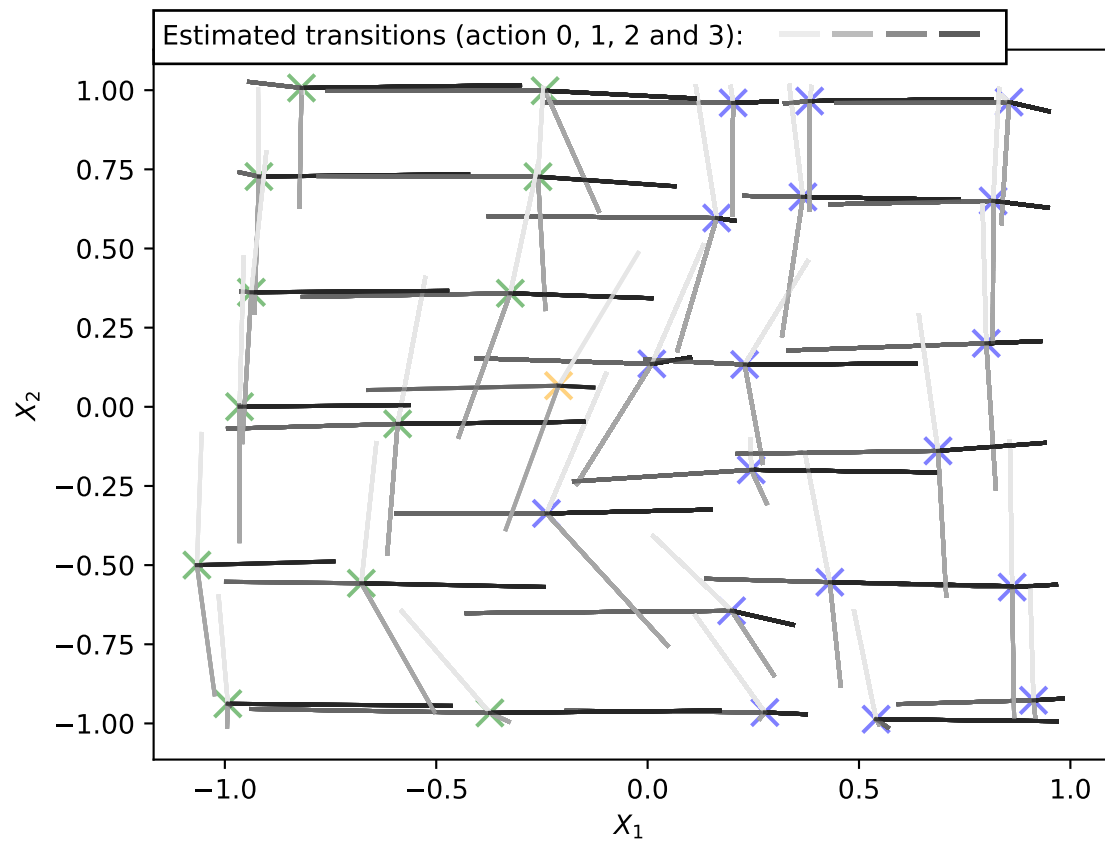

Supplement: supplementary_material [file attachment]

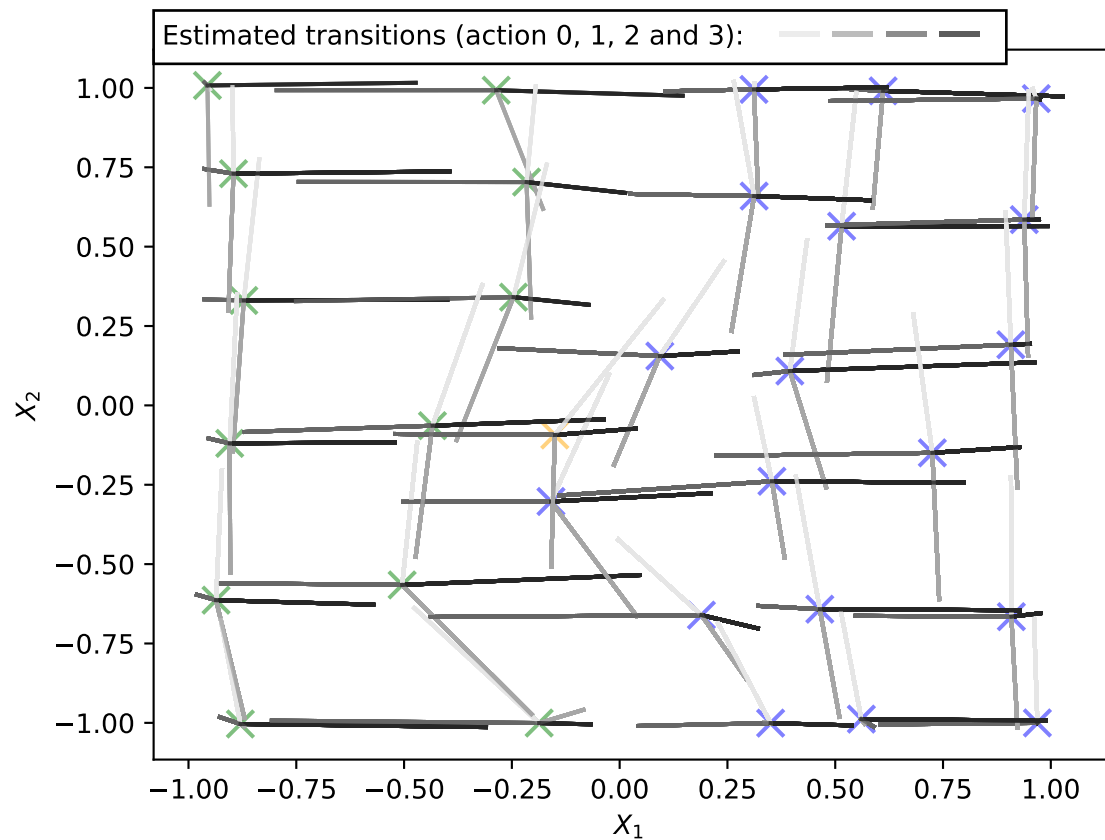

Supplement: supplementary_material [file attachment]

Estimated transitions (action 0, 1, 2 and 3):

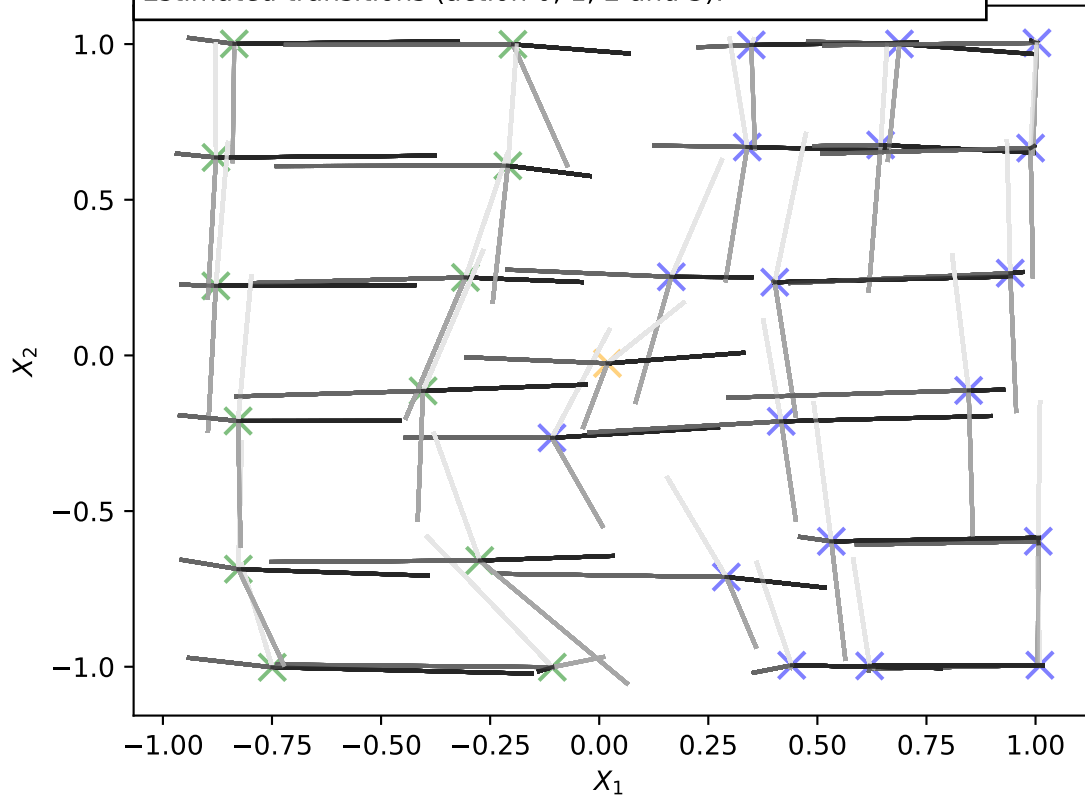

Supplement: supplementary_material [file attachment]

Estimated transitions (action 0, 1, 2 and 3):

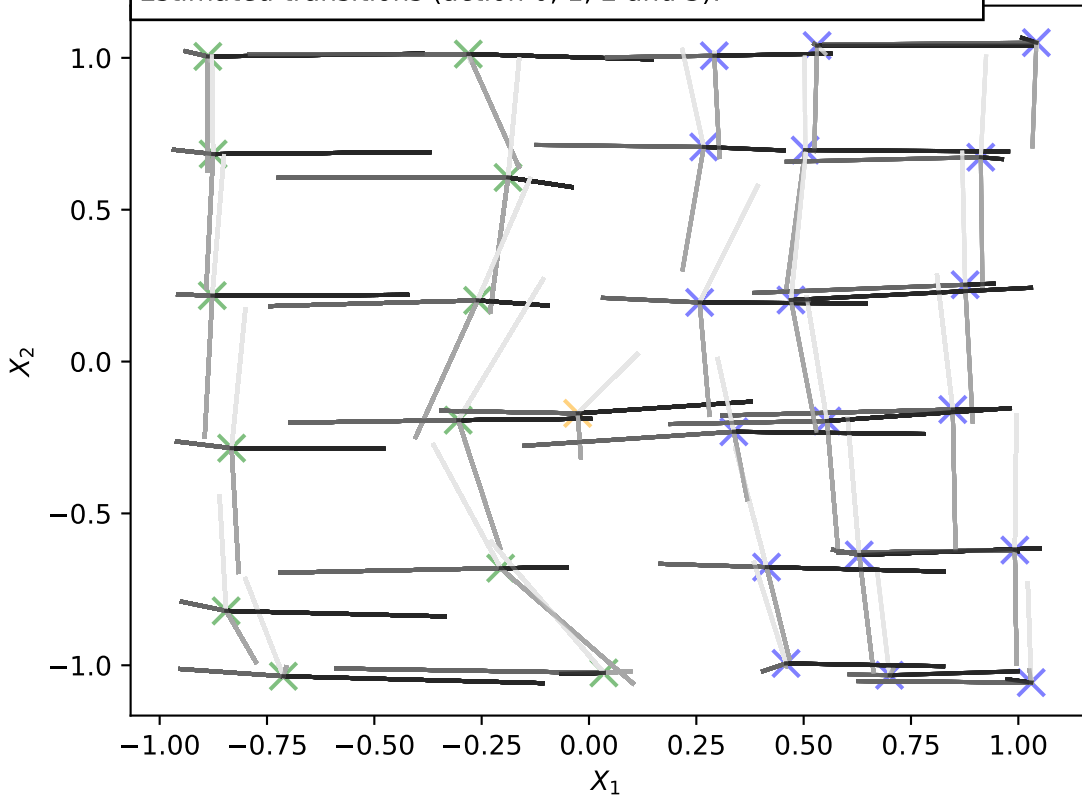

Supplement: supplementary_material [file attachment]

Estimated transitions (action 0, 1, 2 and 3):

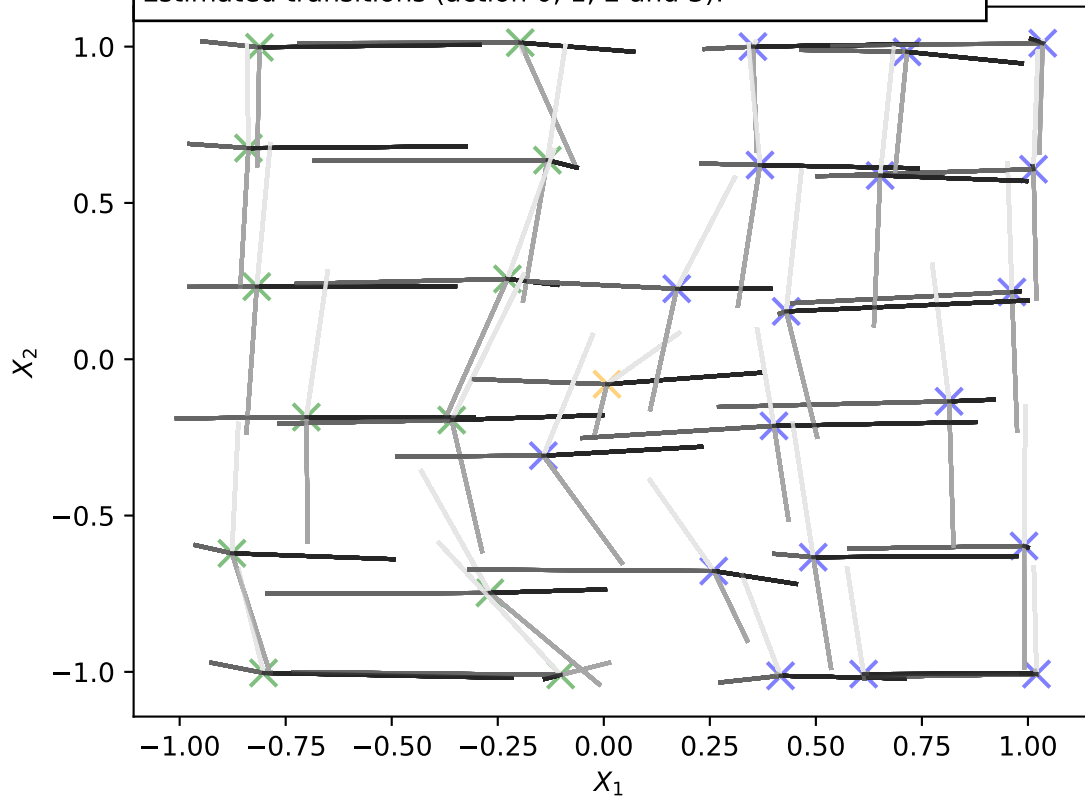

Supplement: supplementary_material [file attachment]

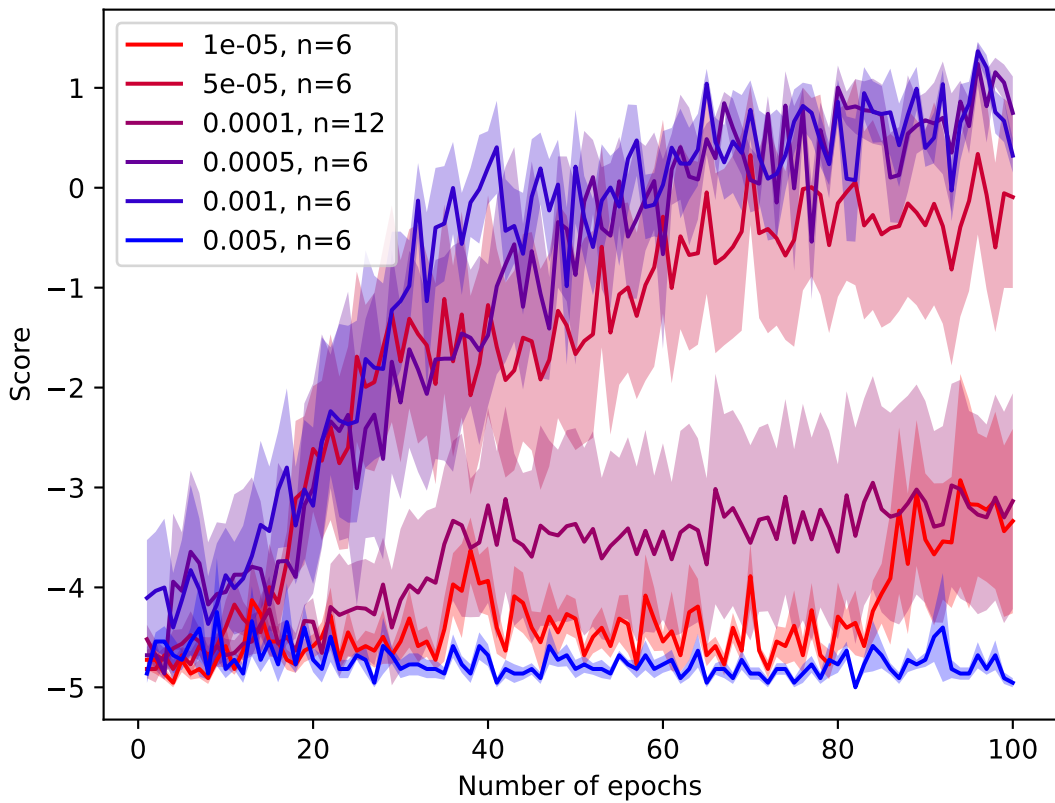

Supplement: supplementary_material [file attachment]

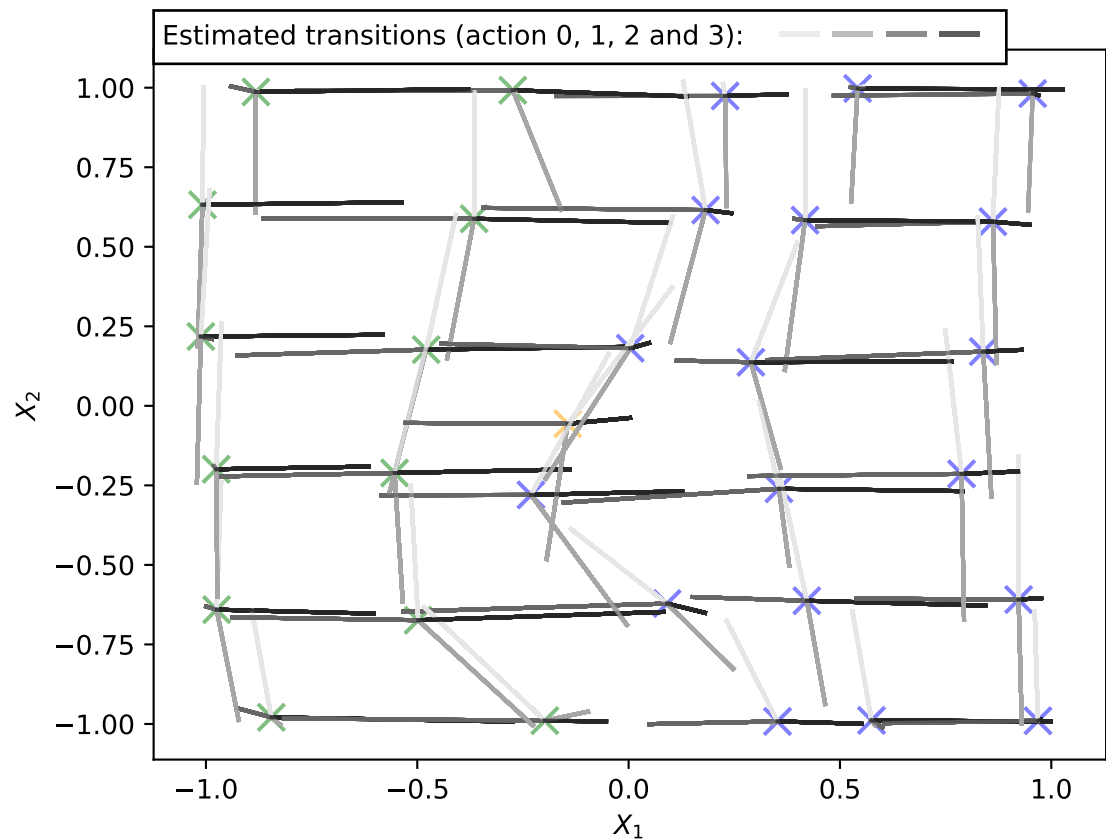

Supplement: supplementary_material [file attachment]

Estimated transitions (action 0, 1, 2 and 3):

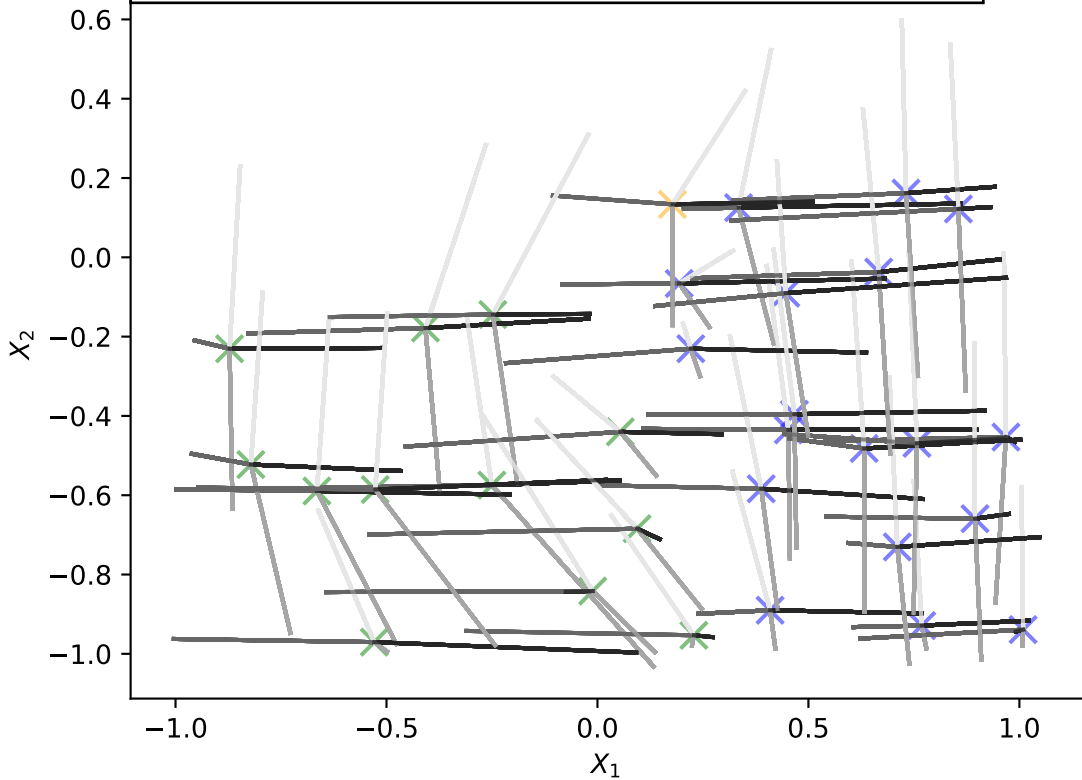

Supplement: supplementary_material [file attachment]

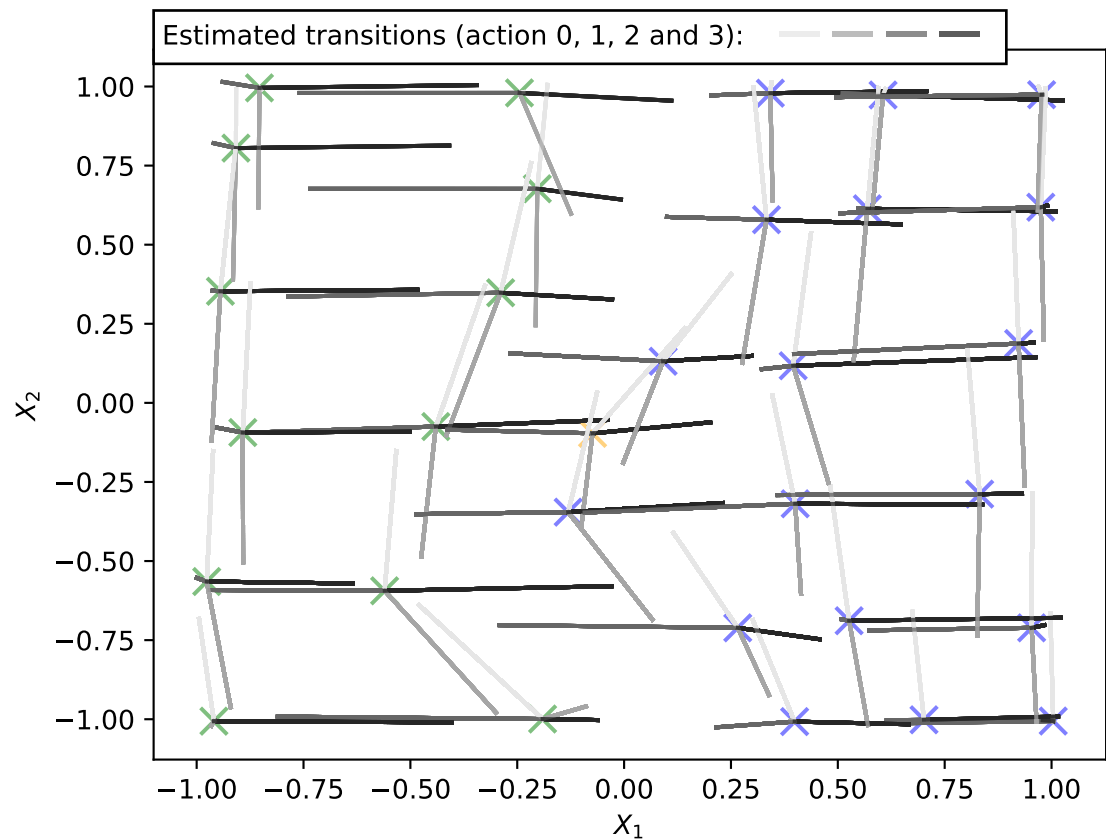

Supplement: supplementary_material [file attachment]

Estimated transitions (action 0, 1, 2 and 3):

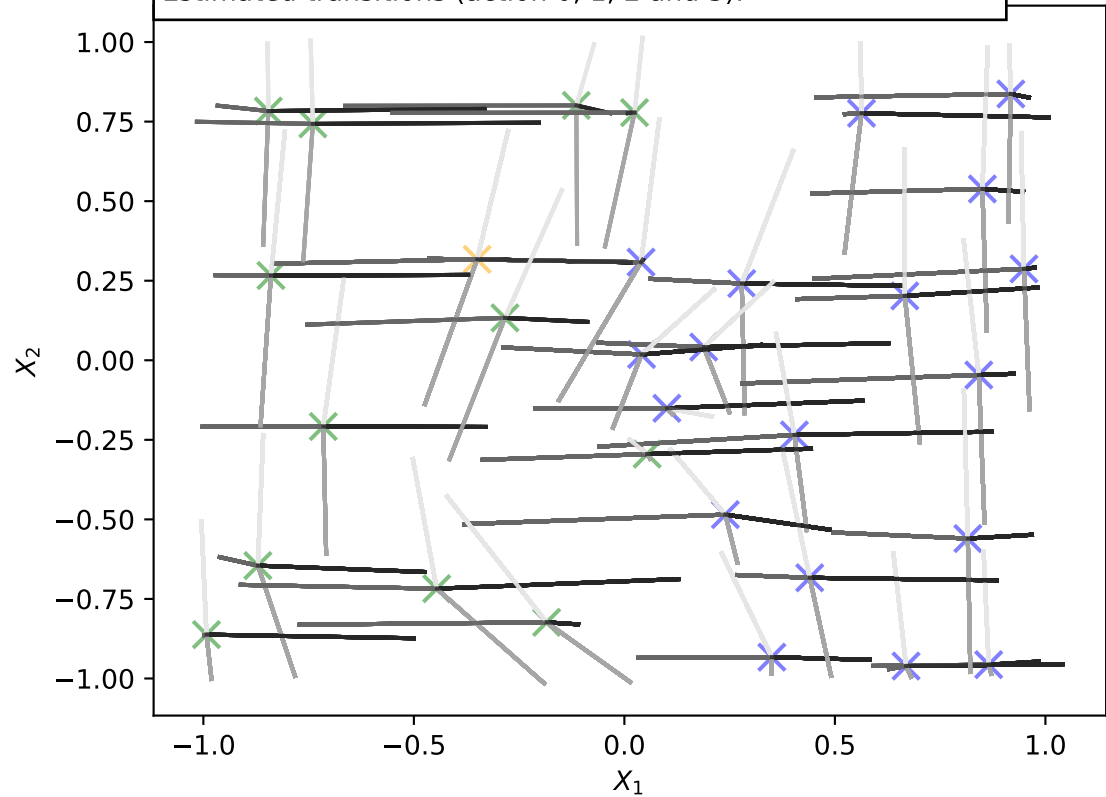

Supplement: supplementary_material [file attachment]

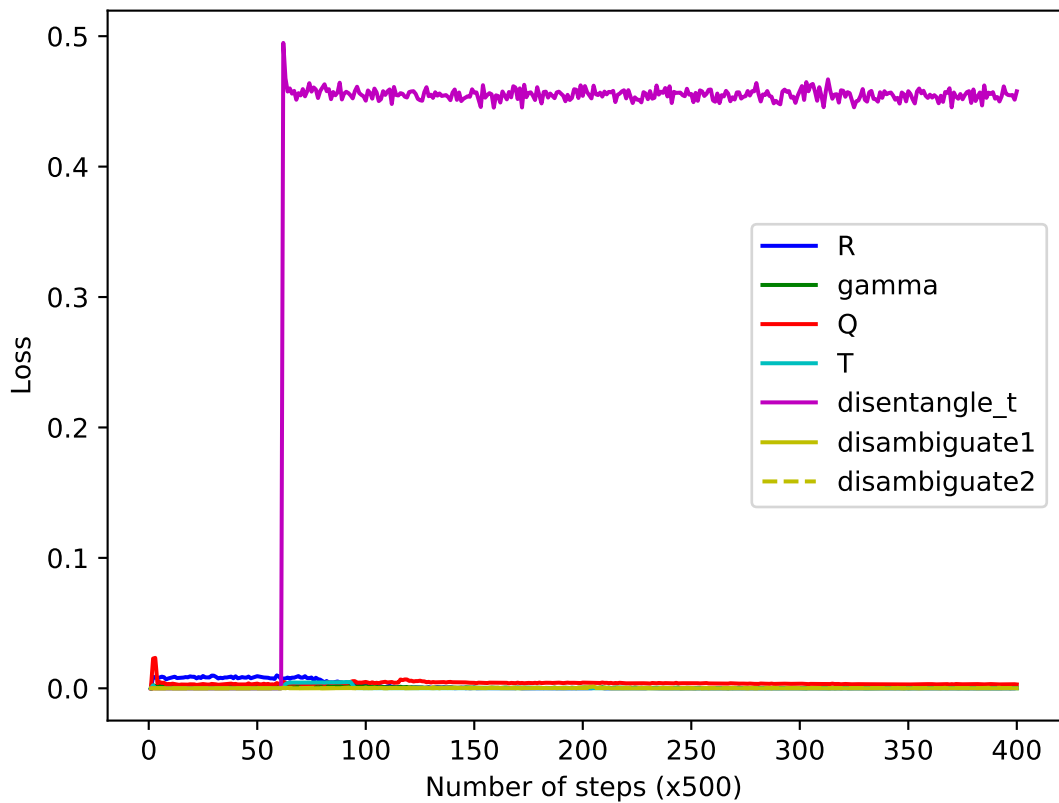

Supplement: supplementary_material [file attachment]

Estimated transitions (action 0, 1, 2 and 3):

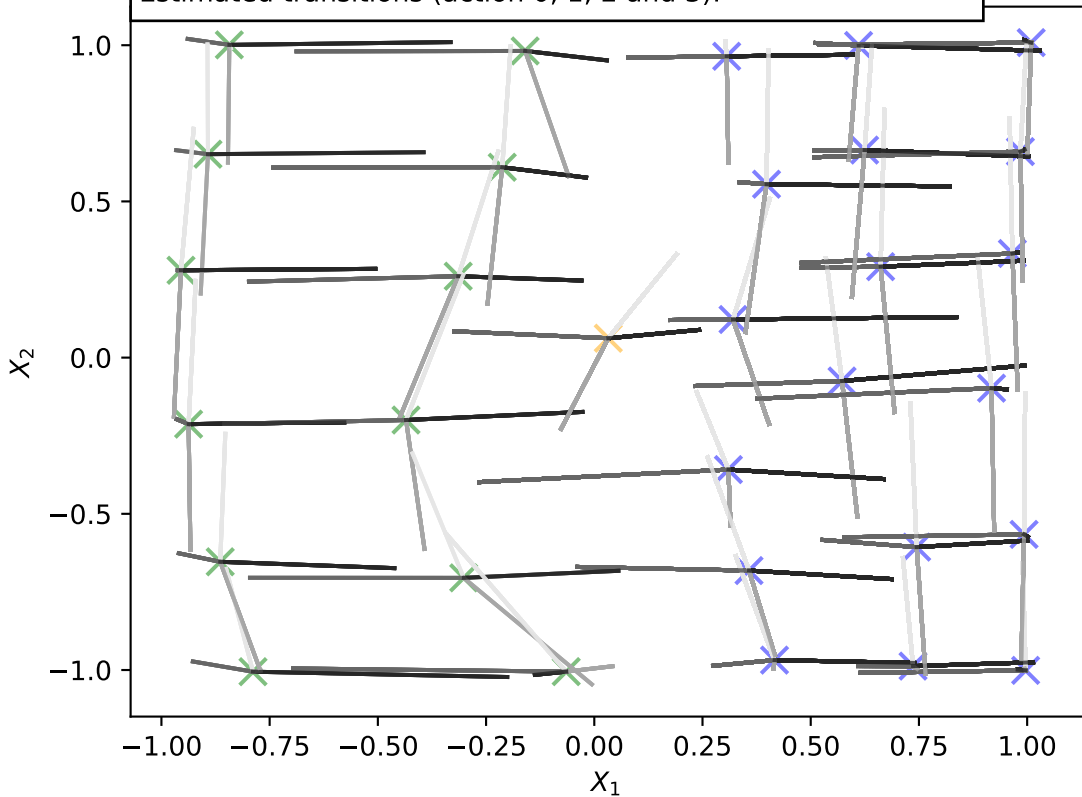

Supplement: supplementary_material [file attachment]

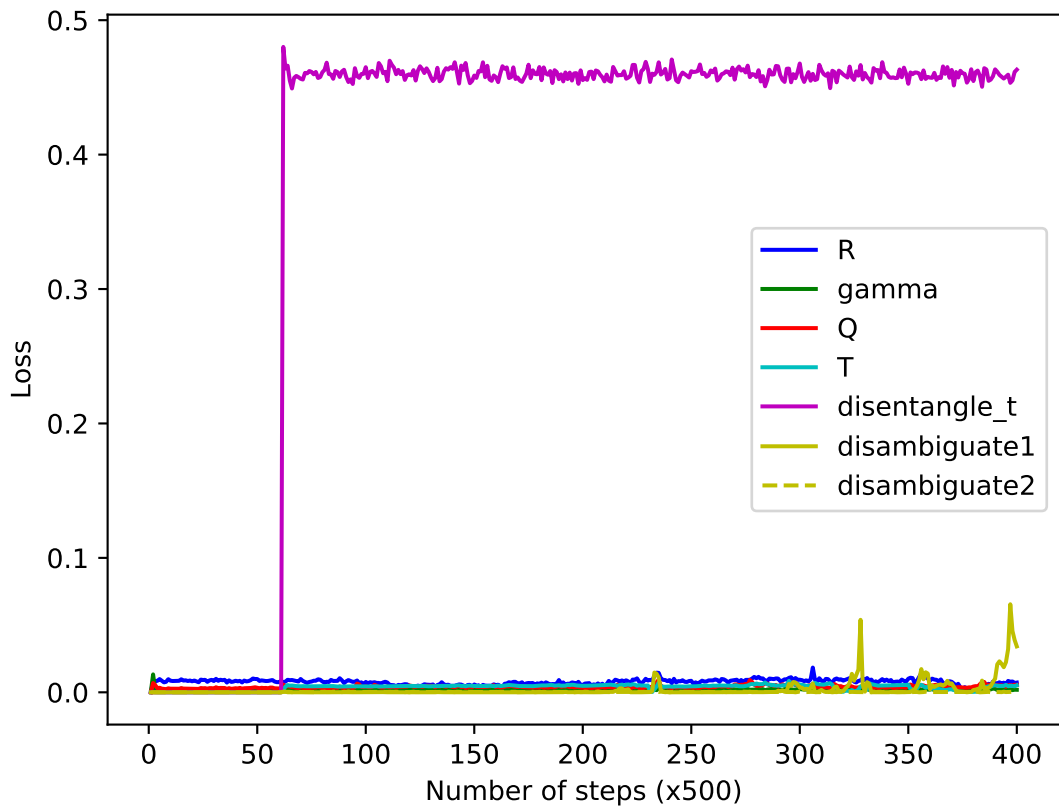

Supplement: supplementary_material [file attachment]

Estimated transitions (action 0, 1, 2 and 3):

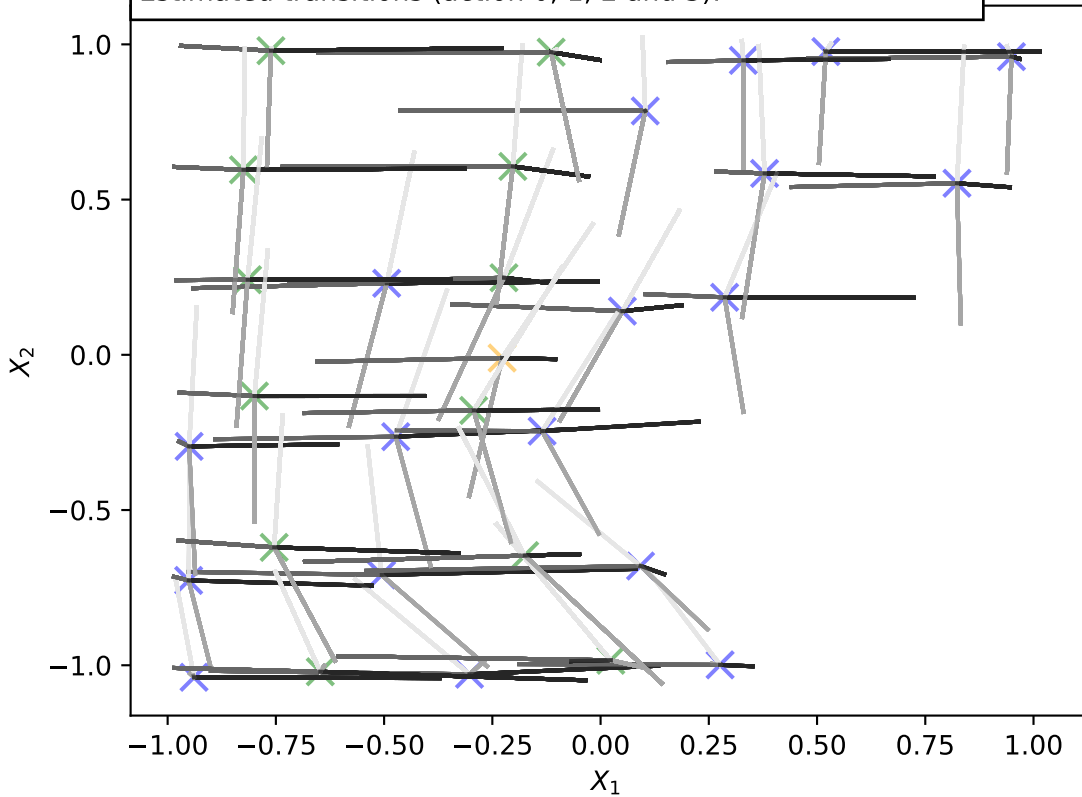

Supplement: supplementary_material [file attachment]

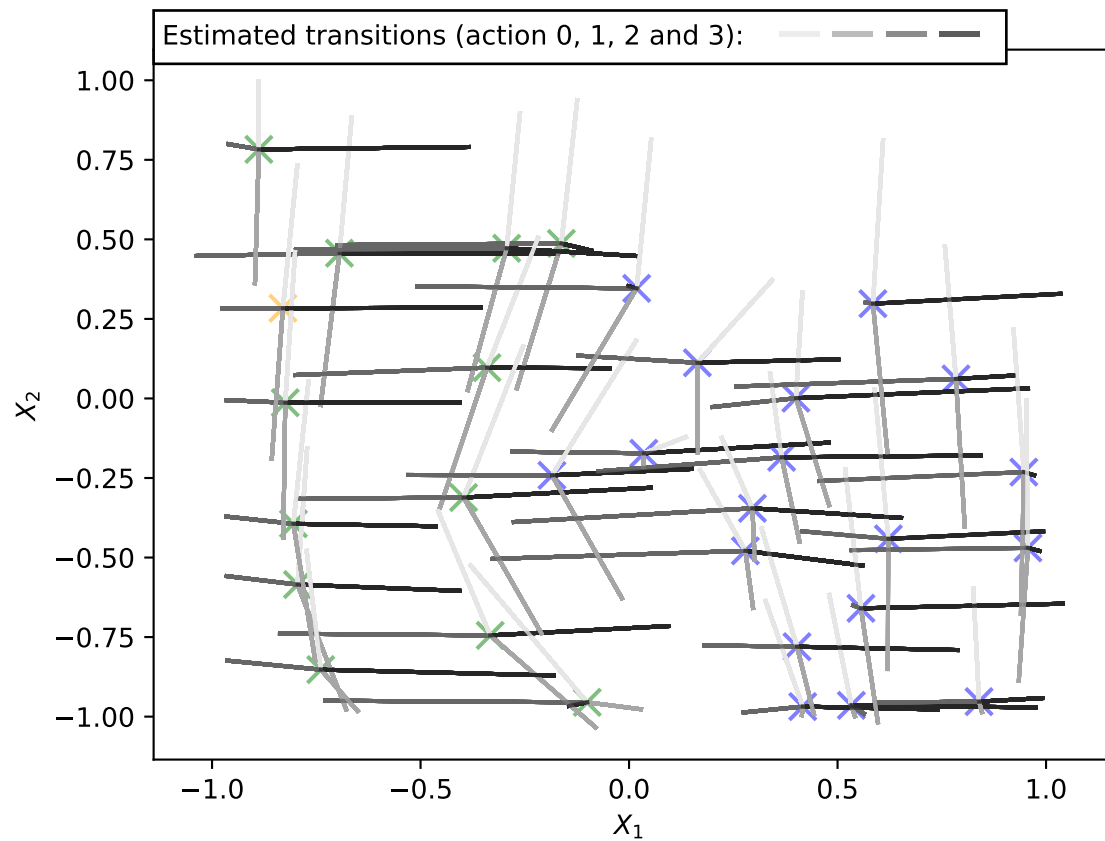

Supplement: supplementary_material [file attachment]

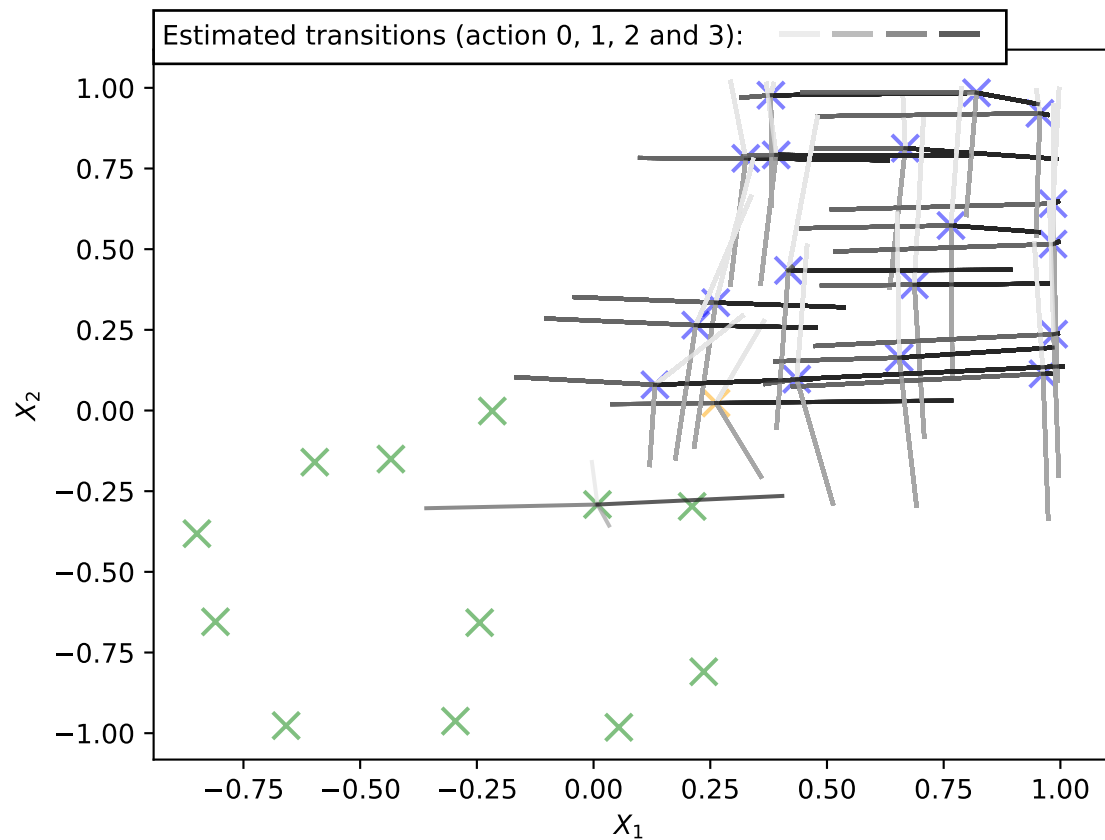

Supplement: supplementary_material [file attachment]

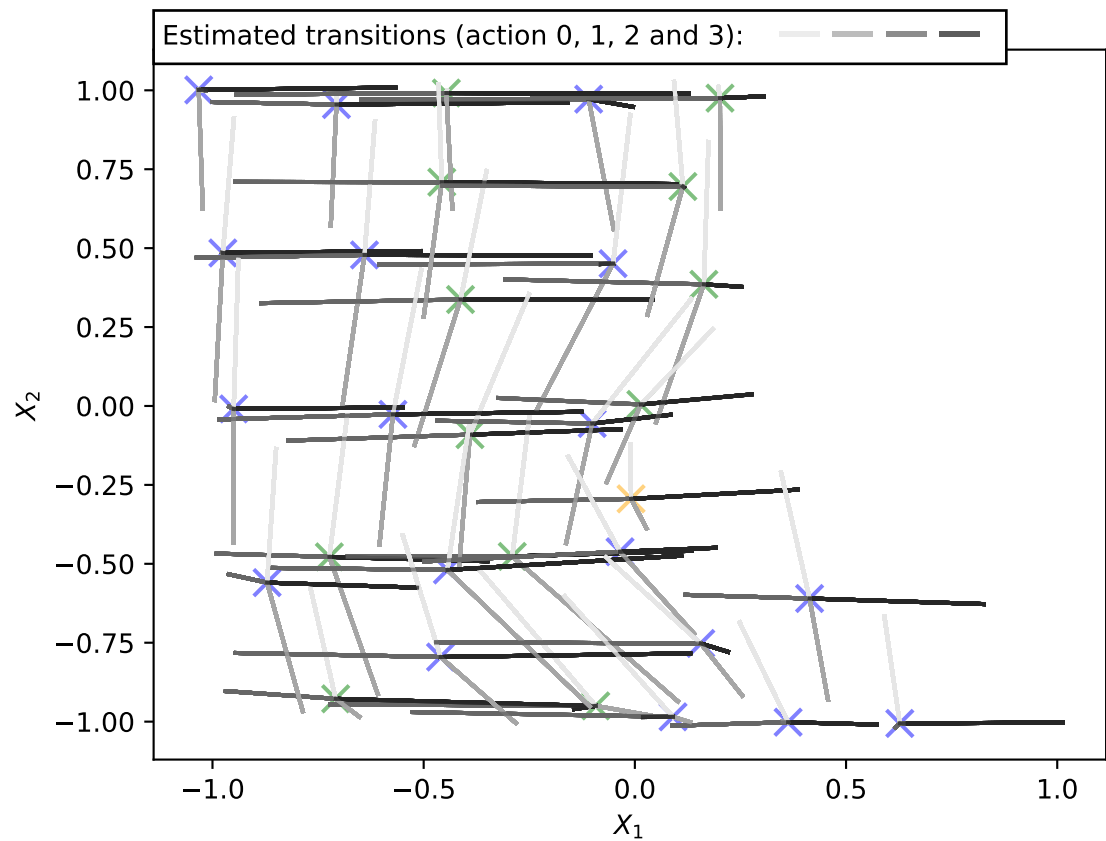

Supplement: supplementary_material [file attachment]

Estimated transitions (action 0, 1, 2 and 3):

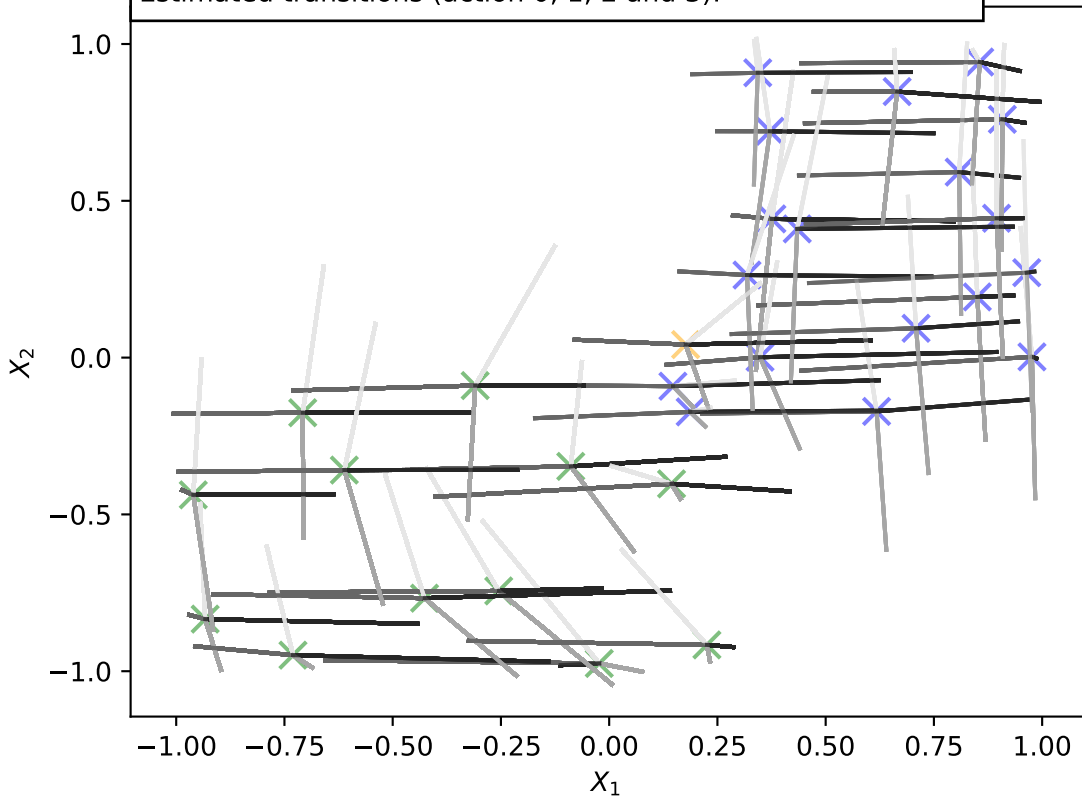

Supplement: supplementary_material [file attachment]

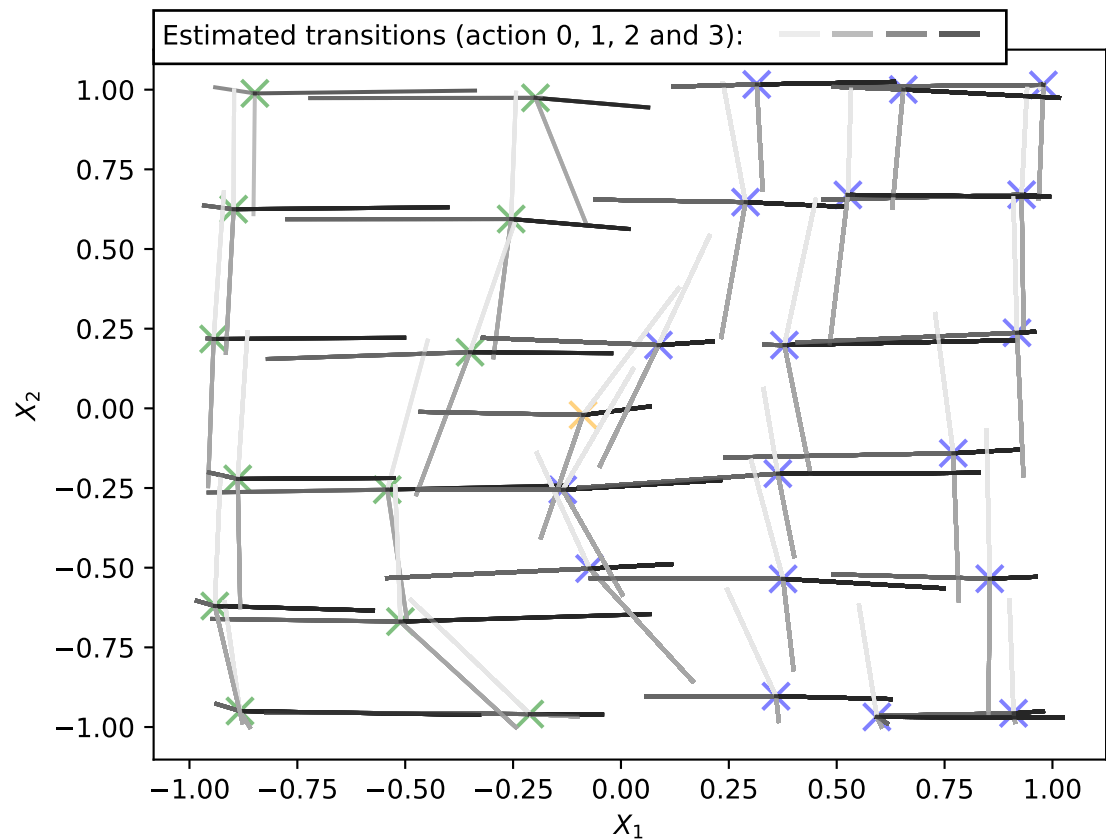

Supplement: supplementary_material [file attachment]

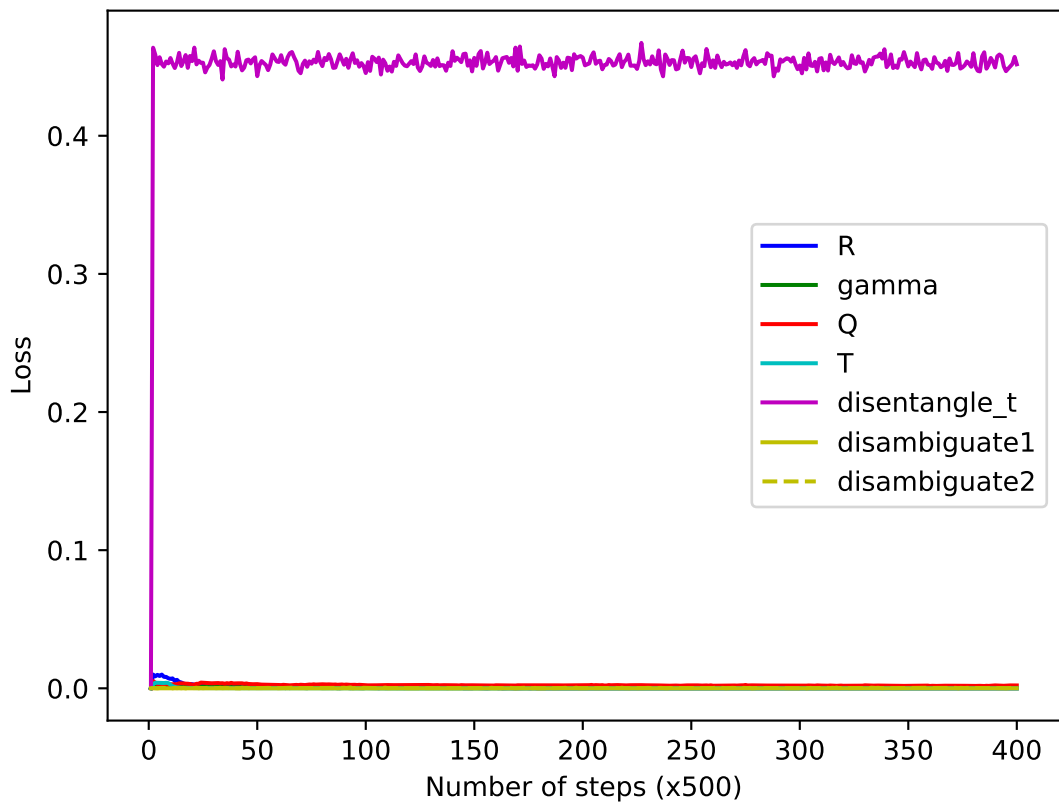

Supplement: supplementary_material [file attachment]

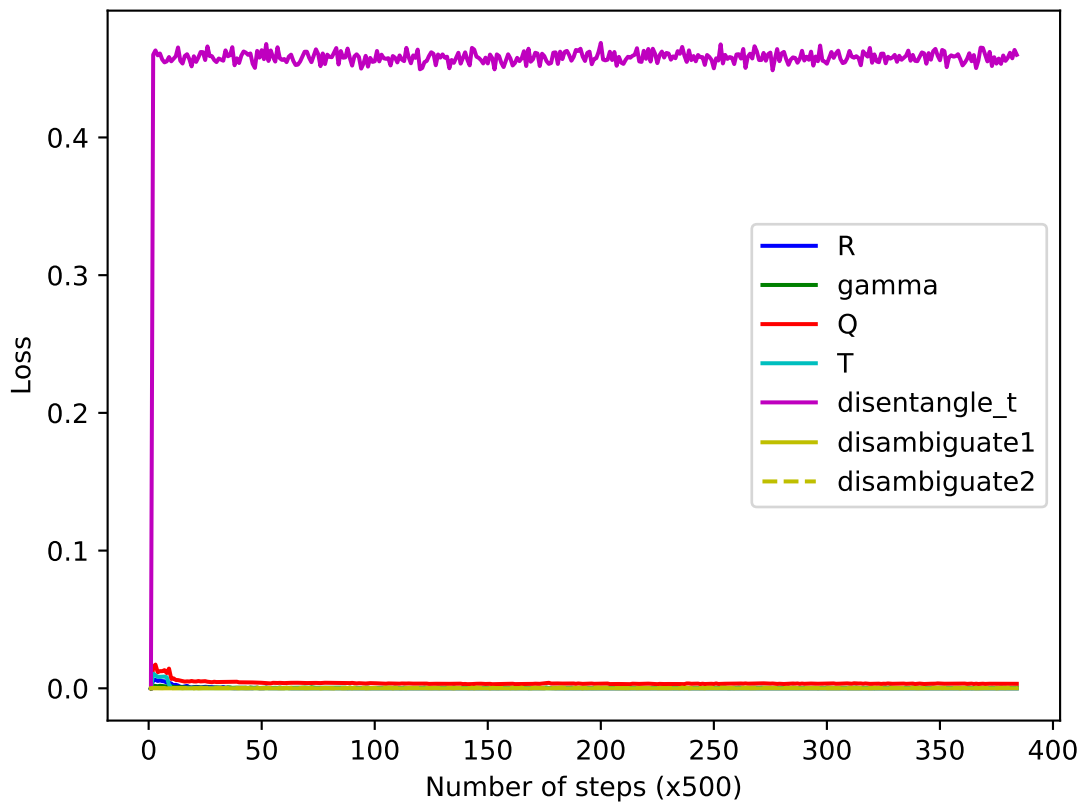

Supplement: supplementary_material [file attachment]

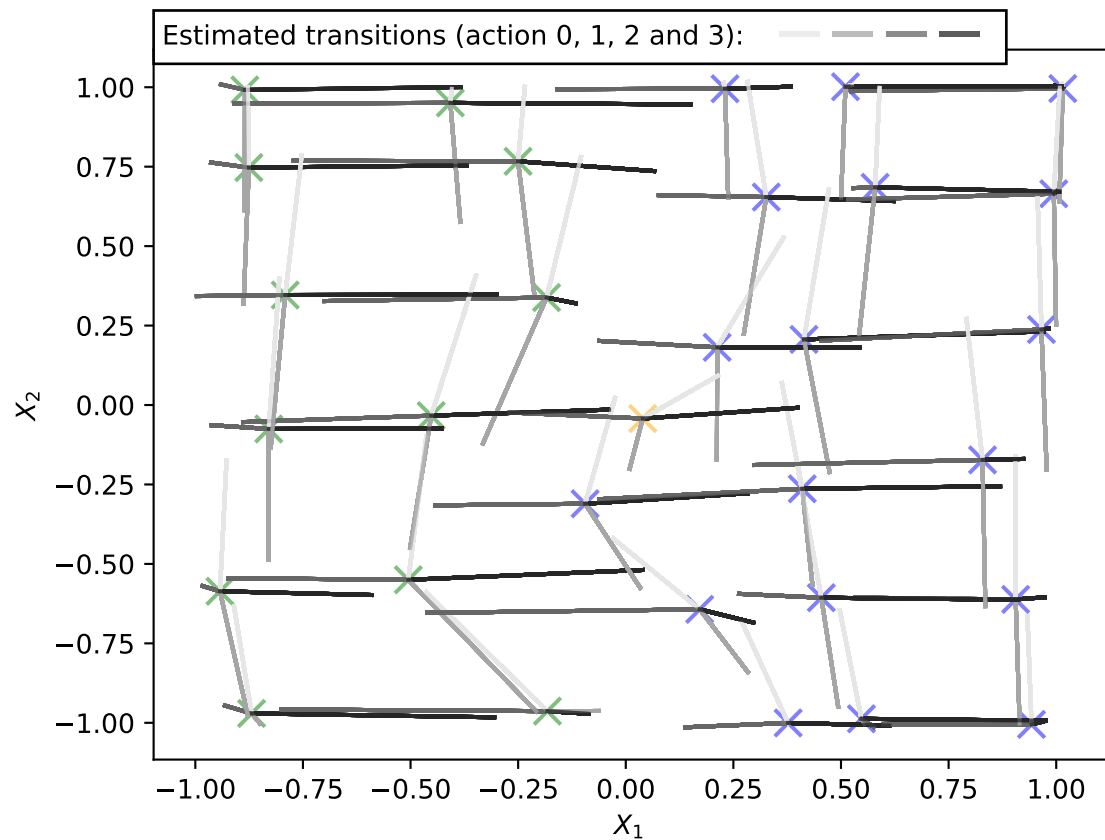

Supplement: supplementary_material [file attachment]

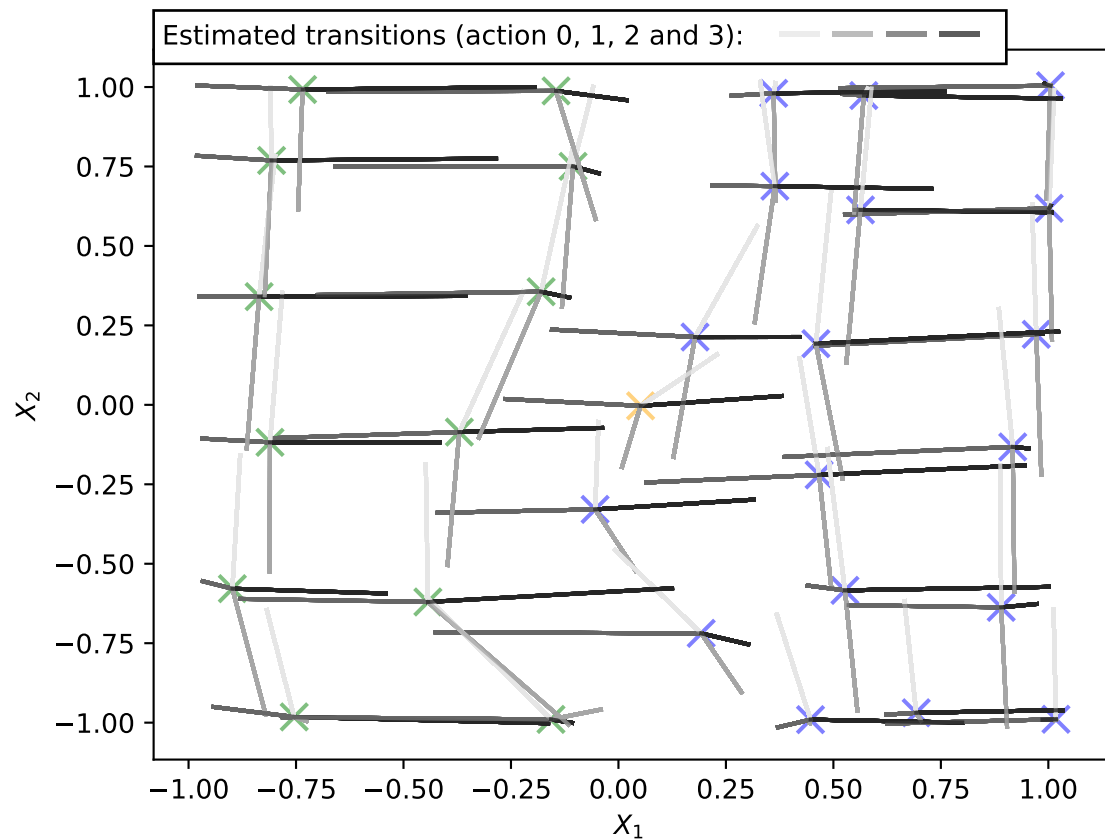

Supplement: supplementary_material [file attachment]

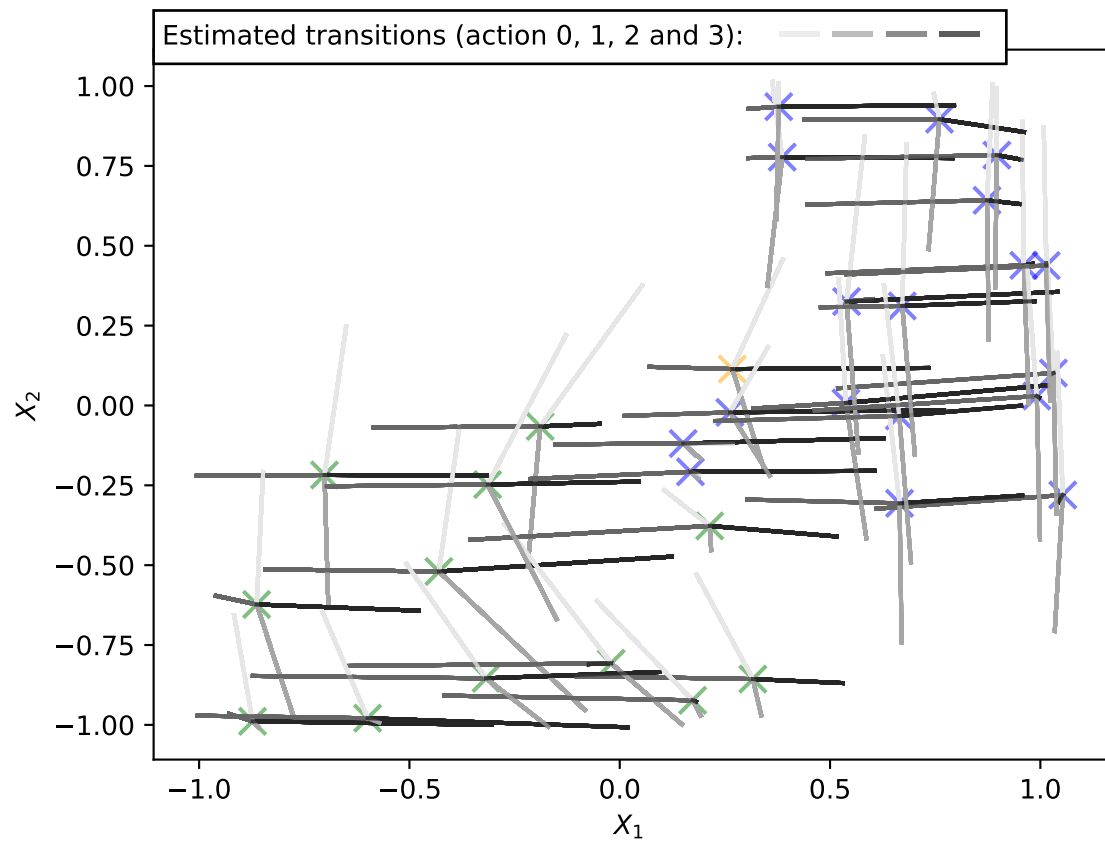

Supplement: supplementary_material [file attachment]

Estimated transitions (action 0, 1, 2 and 3):

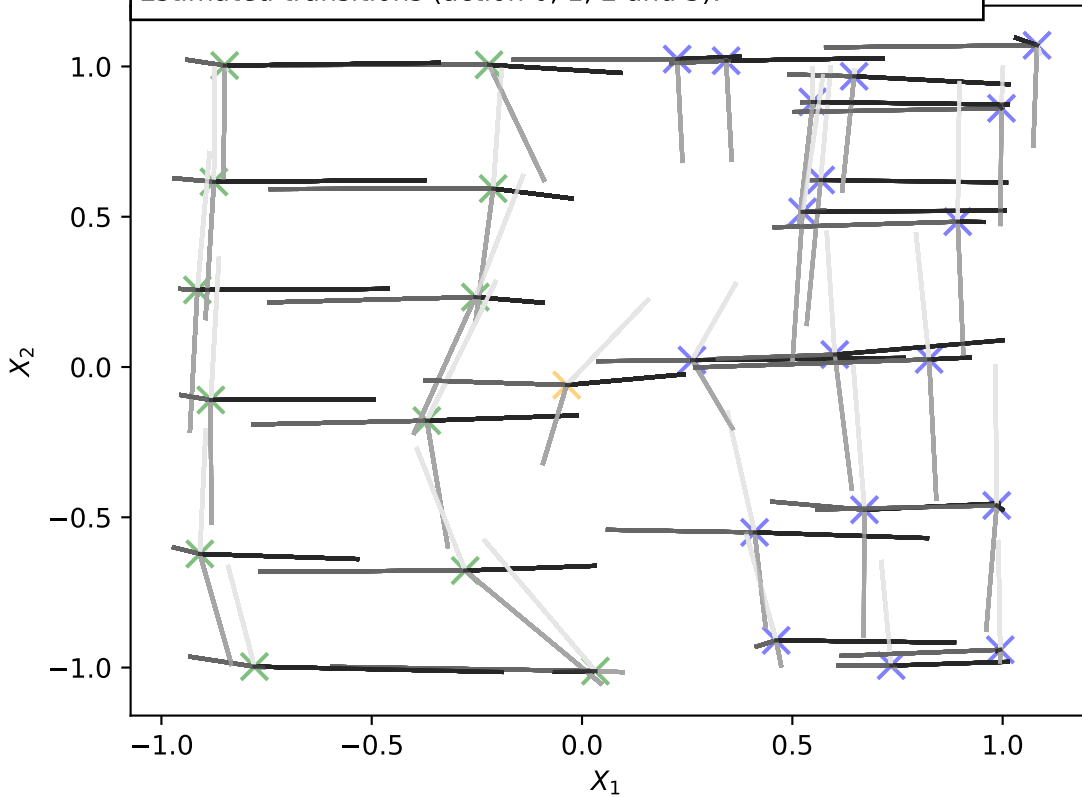

Supplement: supplementary_material [file attachment]

Estimated transitions (action 0, 1, 2 and 3):

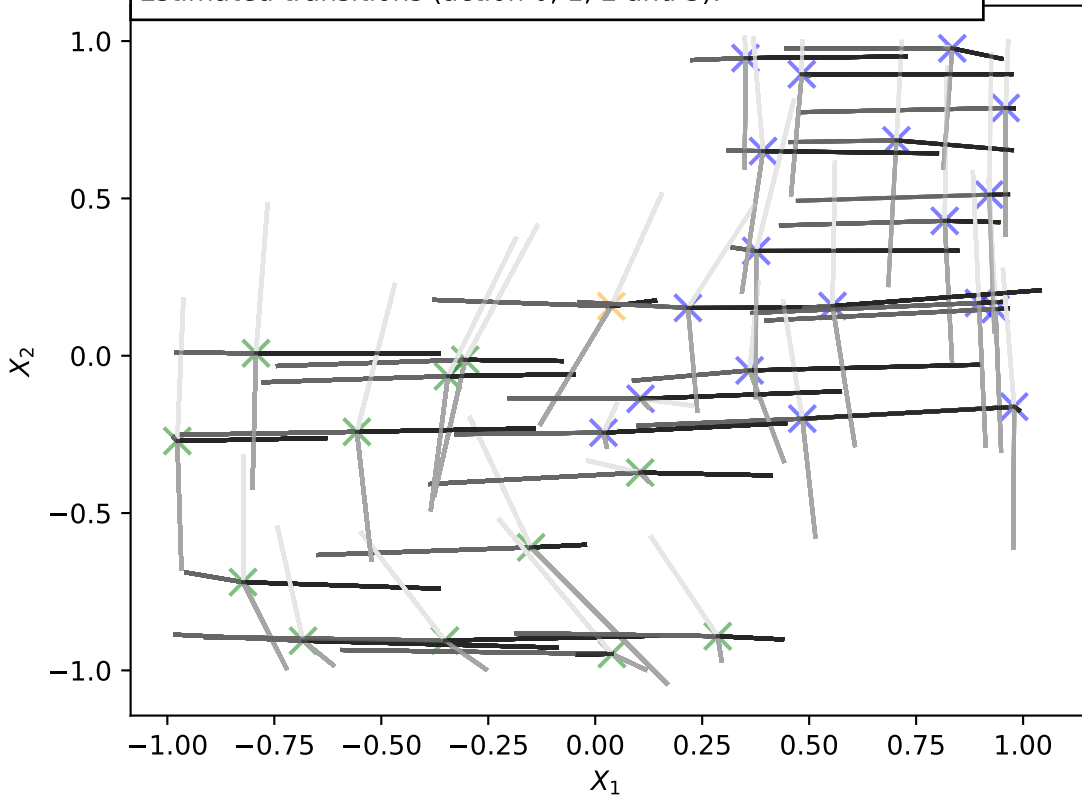

Supplement: supplementary_material [file attachment]

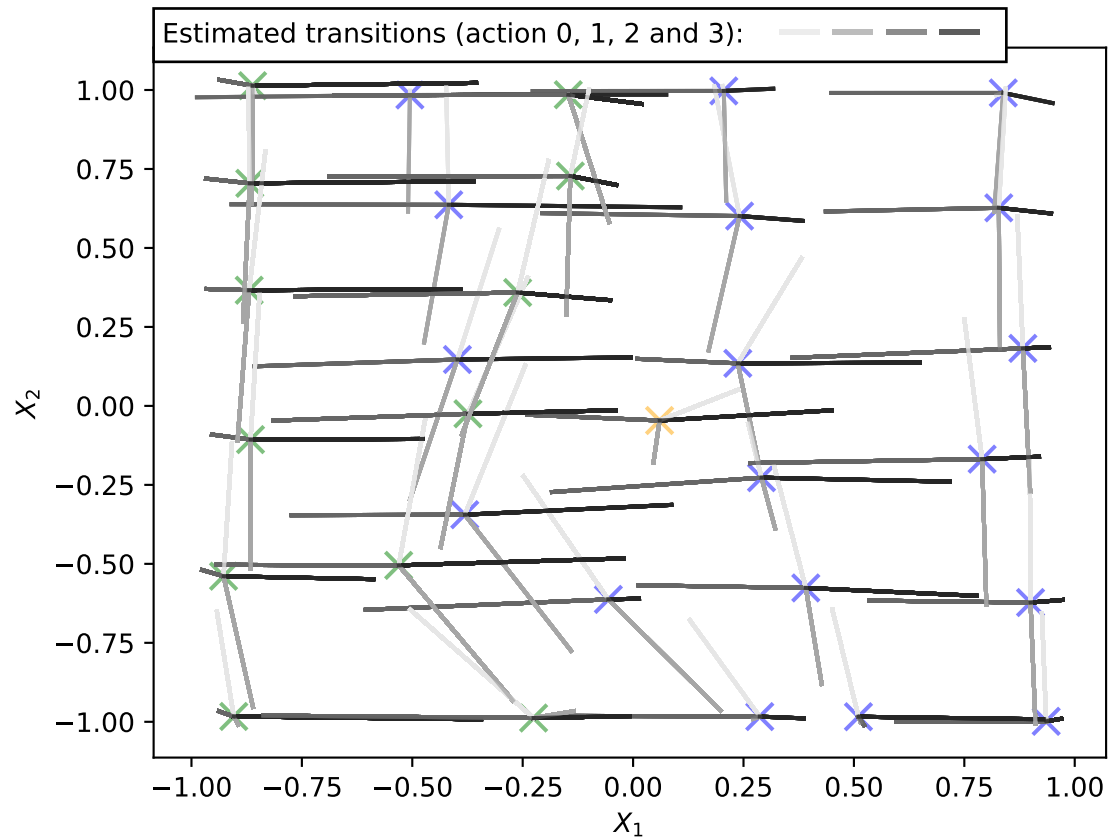

Supplement: supplementary_material [file attachment]

Estimated transitions (action 0, 1, 2 and 3):

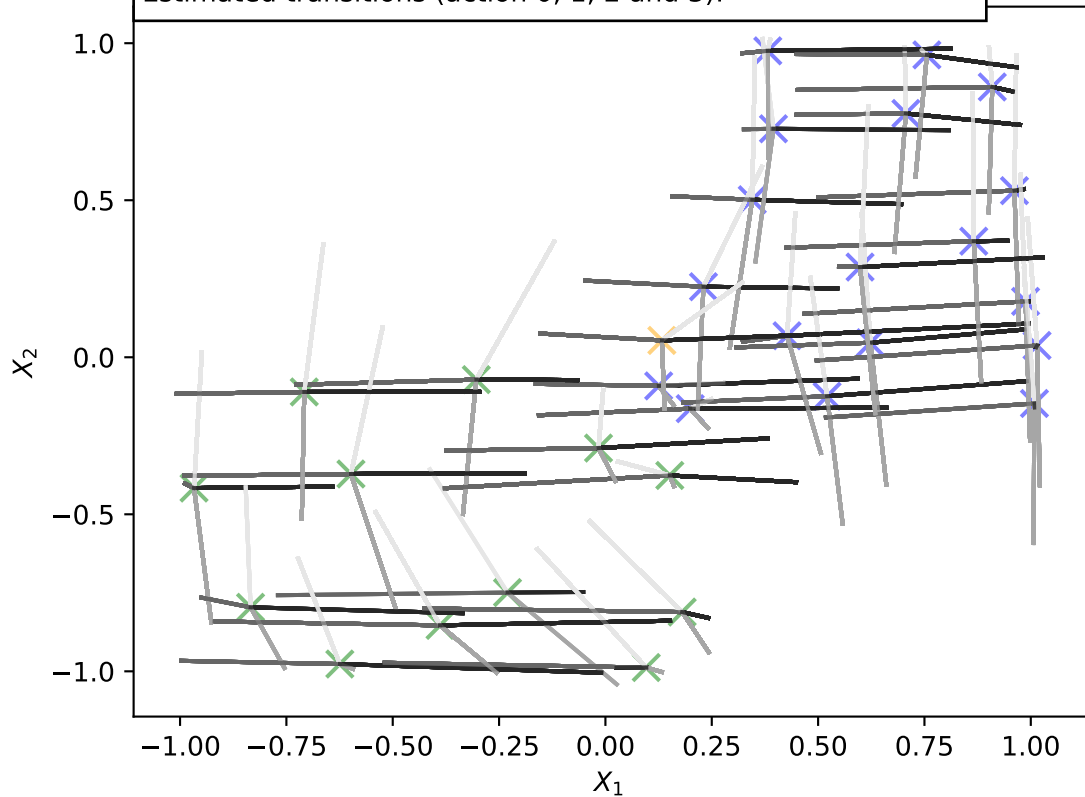

Supplement: supplementary_material [file attachment]

Estimated transitions (action 0, 1, 2 and 3):

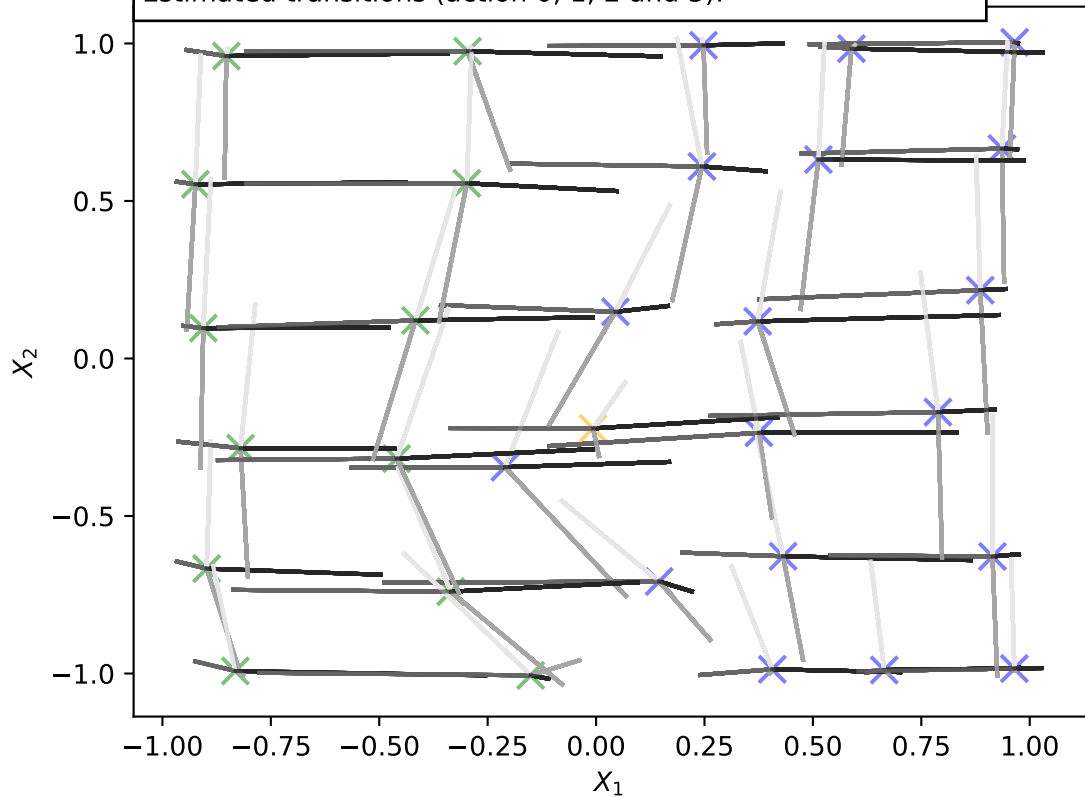

Supplement: supplementary_material [file attachment]

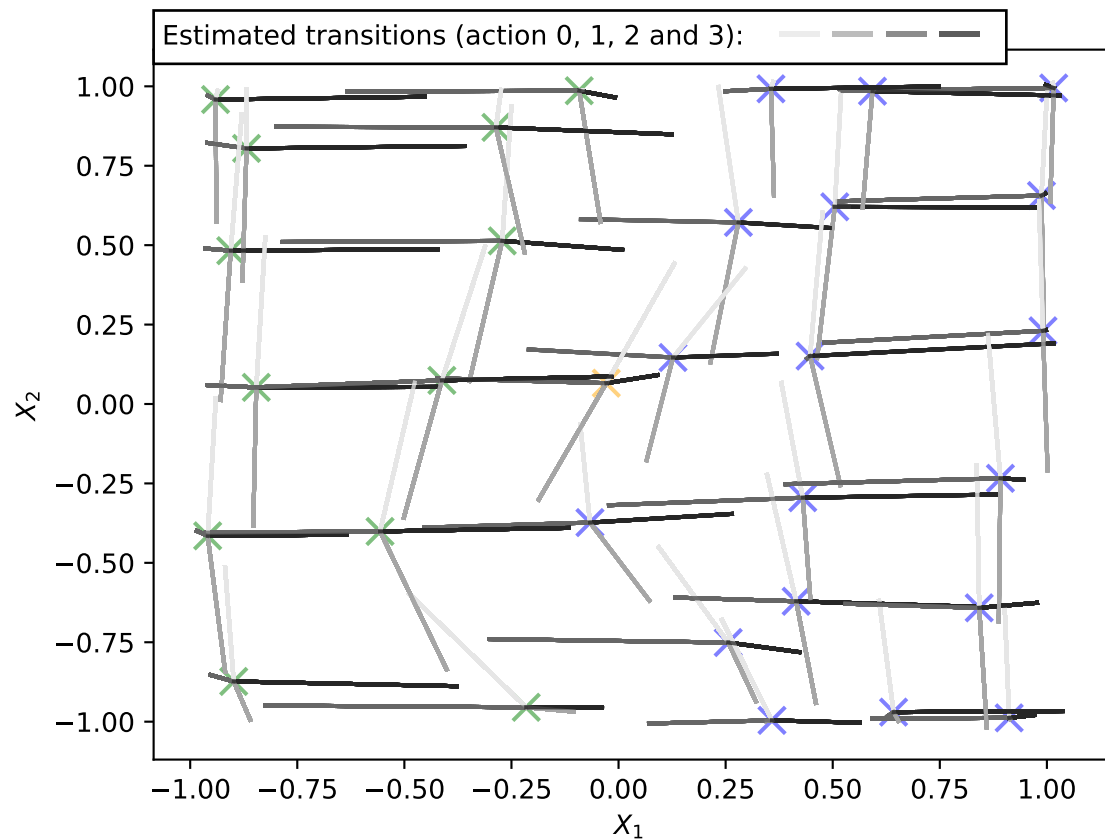

Supplement: supplementary_material [file attachment]

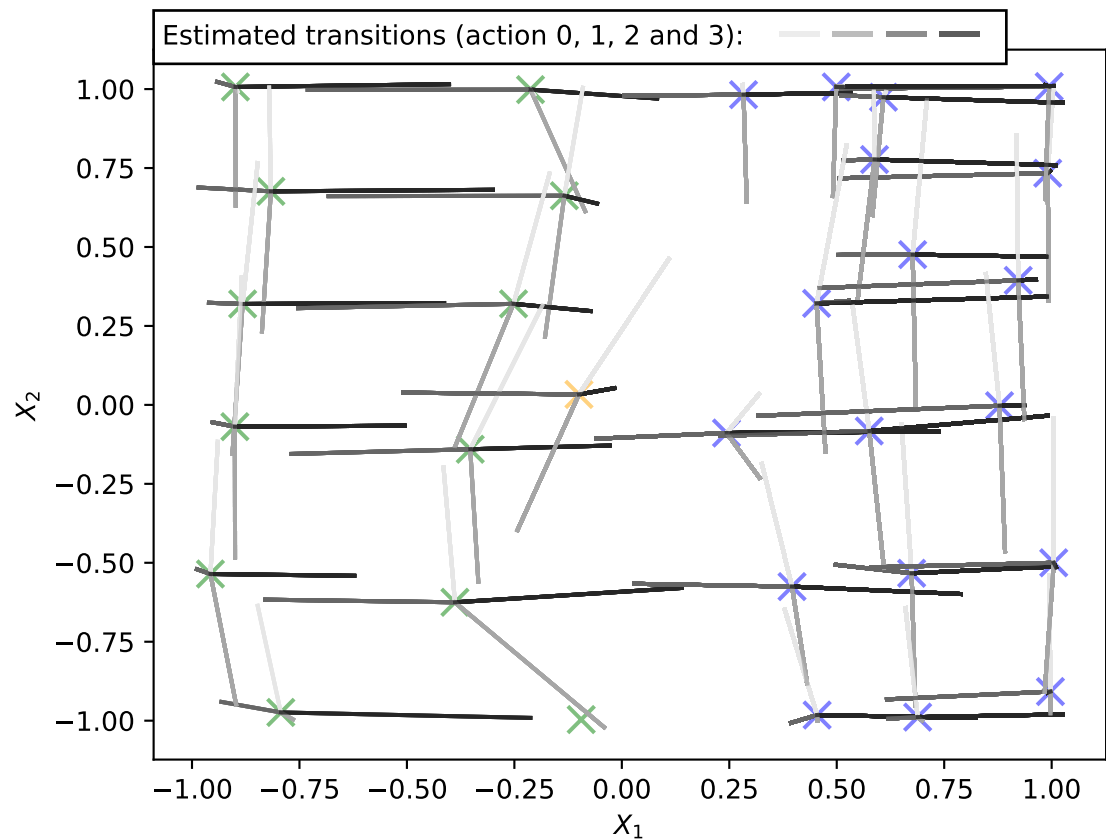

Supplement: supplementary_material [file attachment]

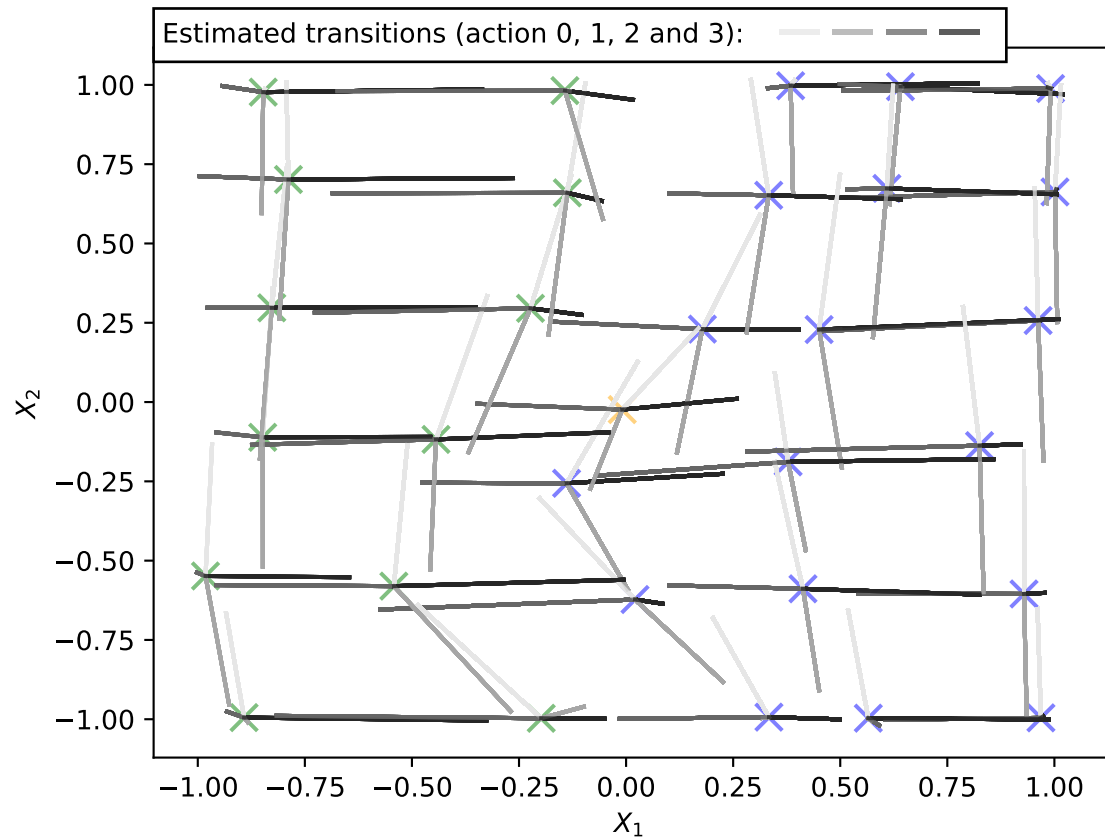

Supplement: supplementary_material [file attachment]

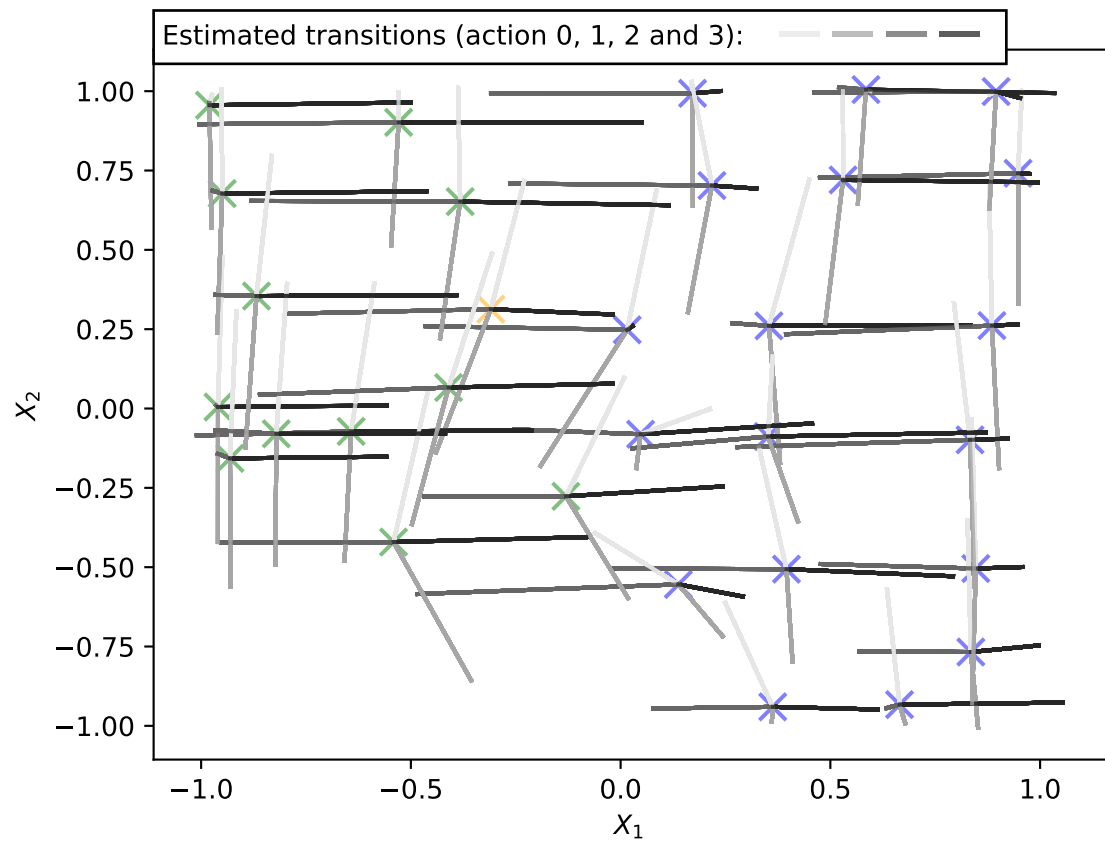

Supplement: supplementary_material [file attachment]

Estimated transitions (action 0, 1, 2 and 3):

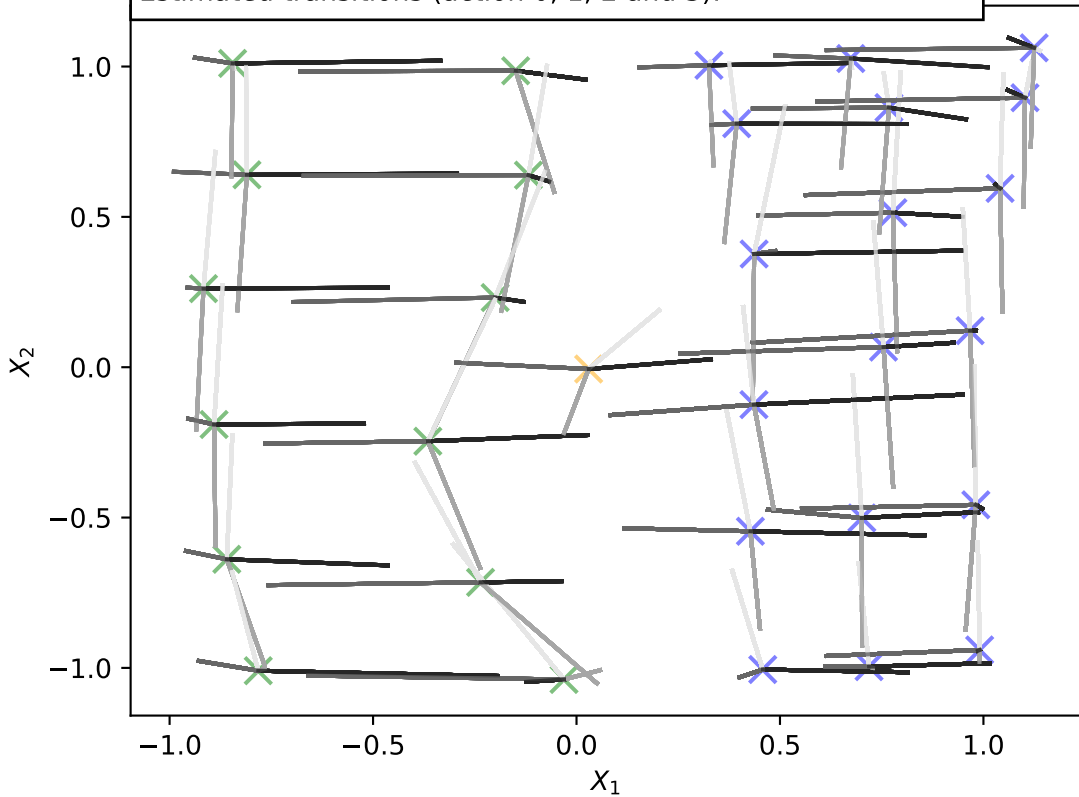

Supplement: supplementary_material [file attachment]

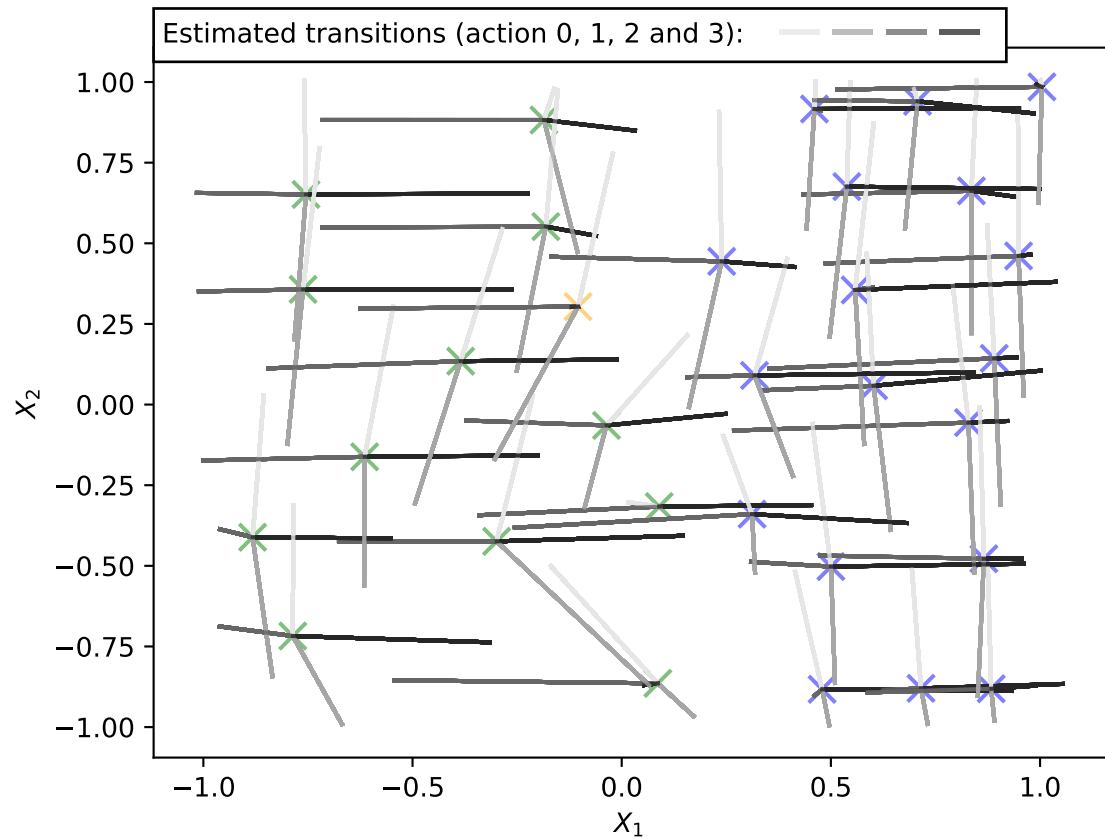

Supplement: supplementary_material [file attachment]

Estimated transitions (action 0, 1, 2 and 3):

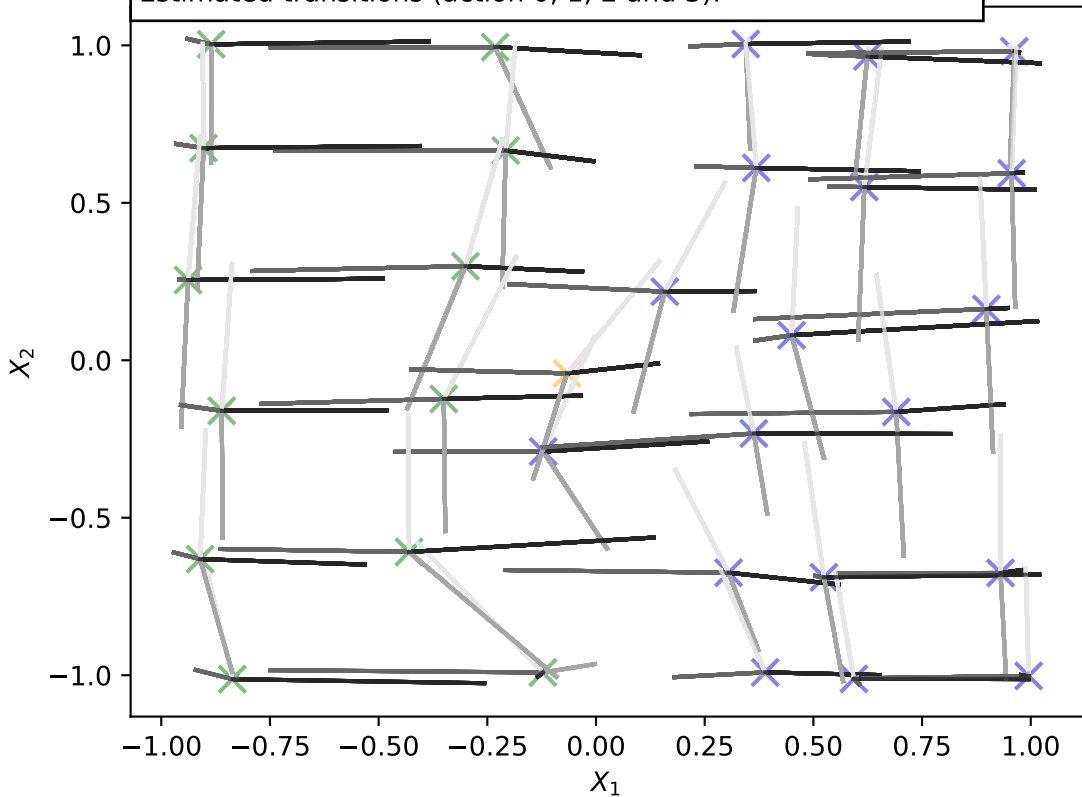

Supplement: supplementary_material [file attachment]

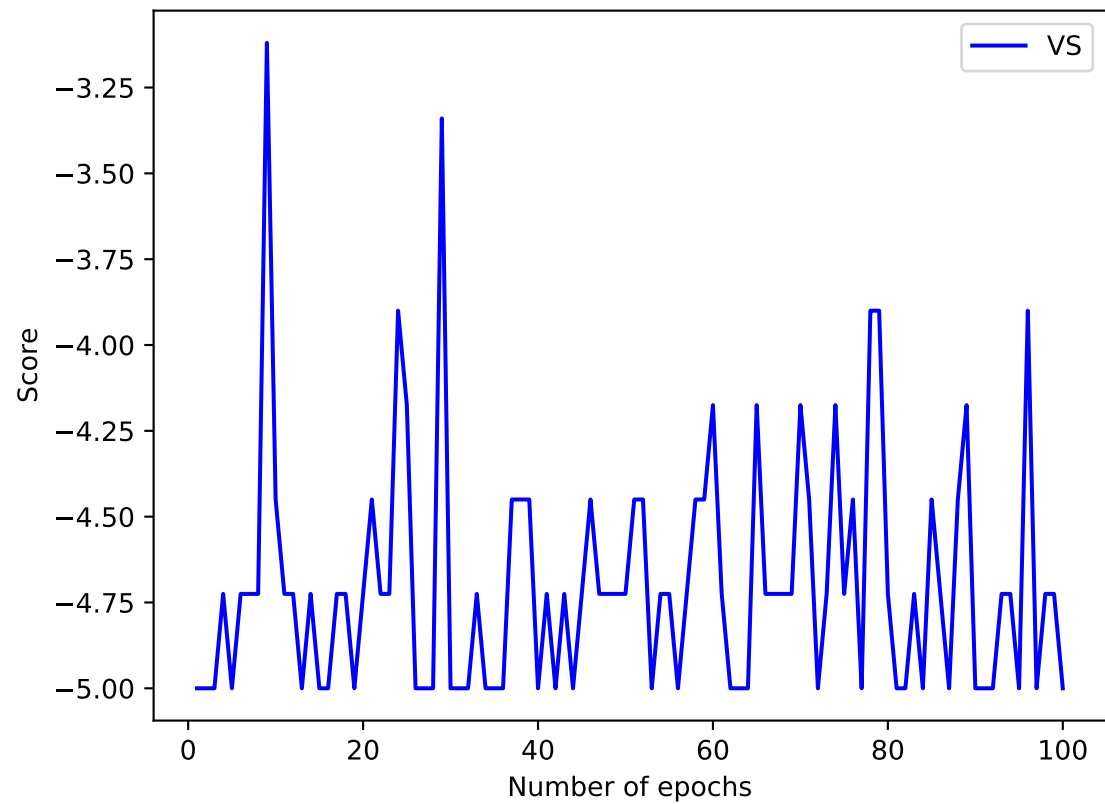

Supplement: supplementary_material [file attachment]

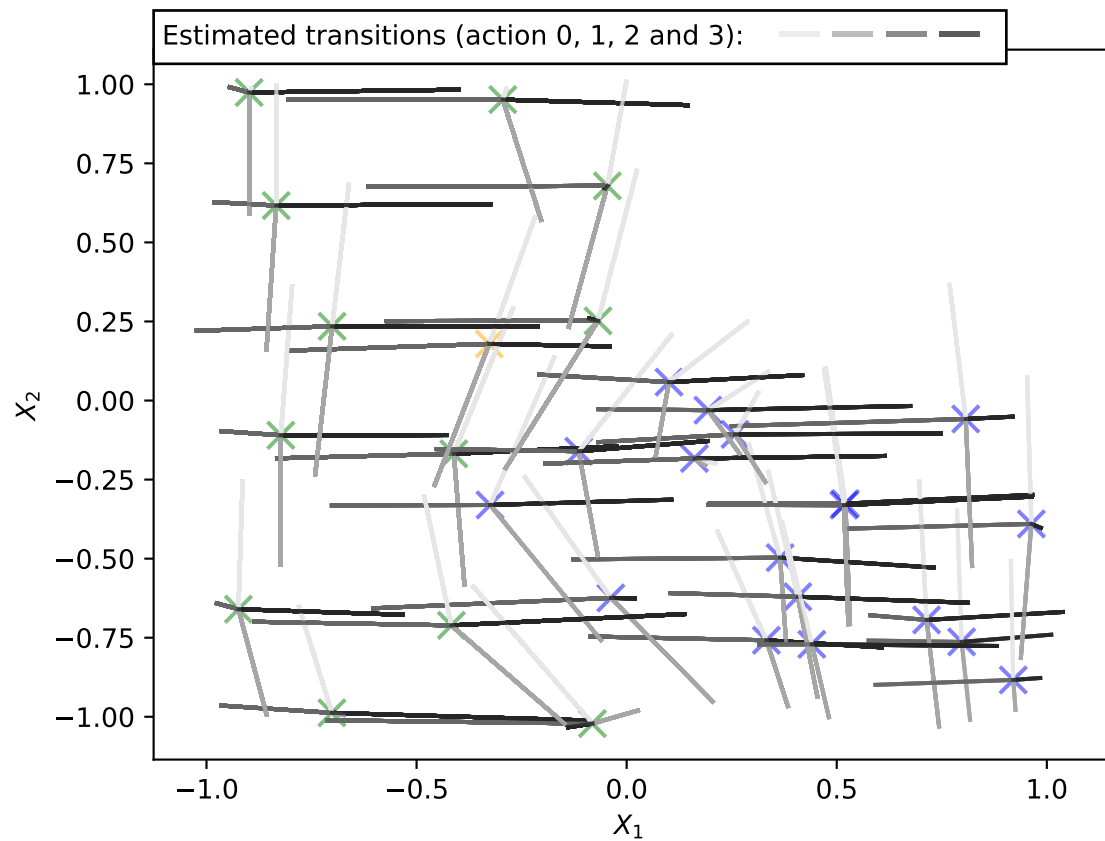

Supplement: supplementary_material [file attachment]

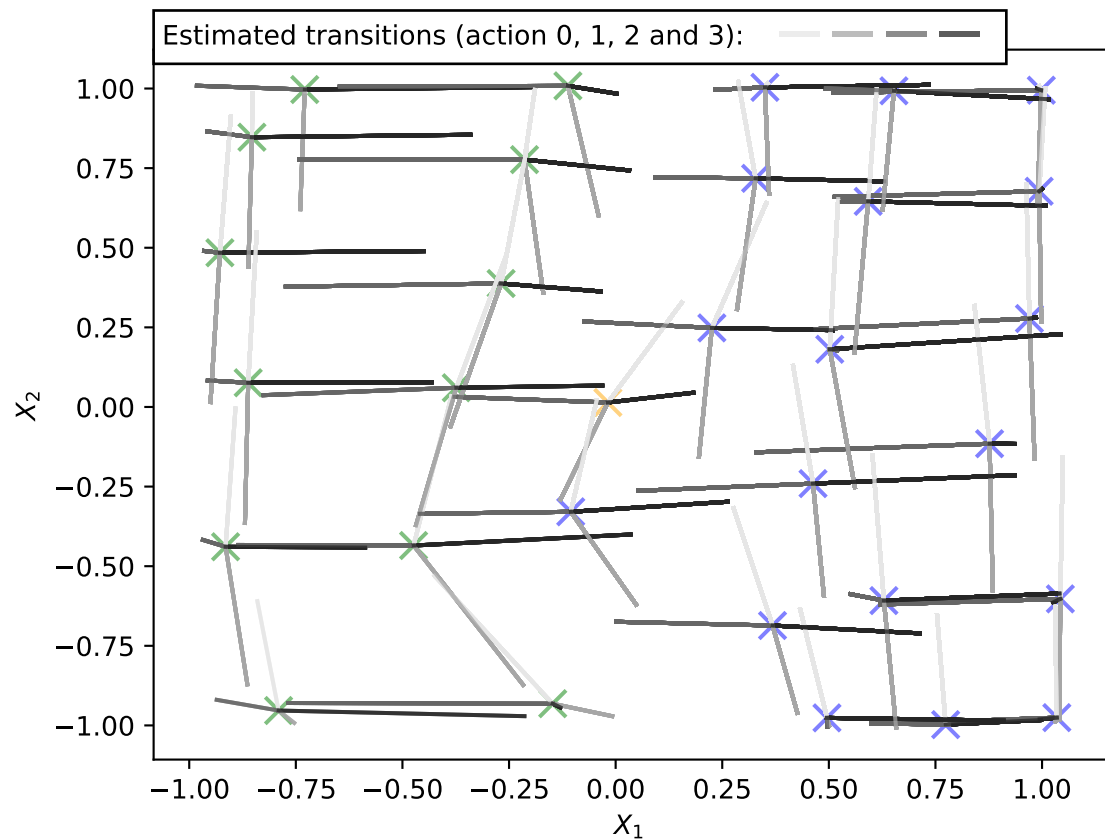

Supplement: supplementary_material [file attachment]

Estimated transitions (action 0, 1, 2 and 3):

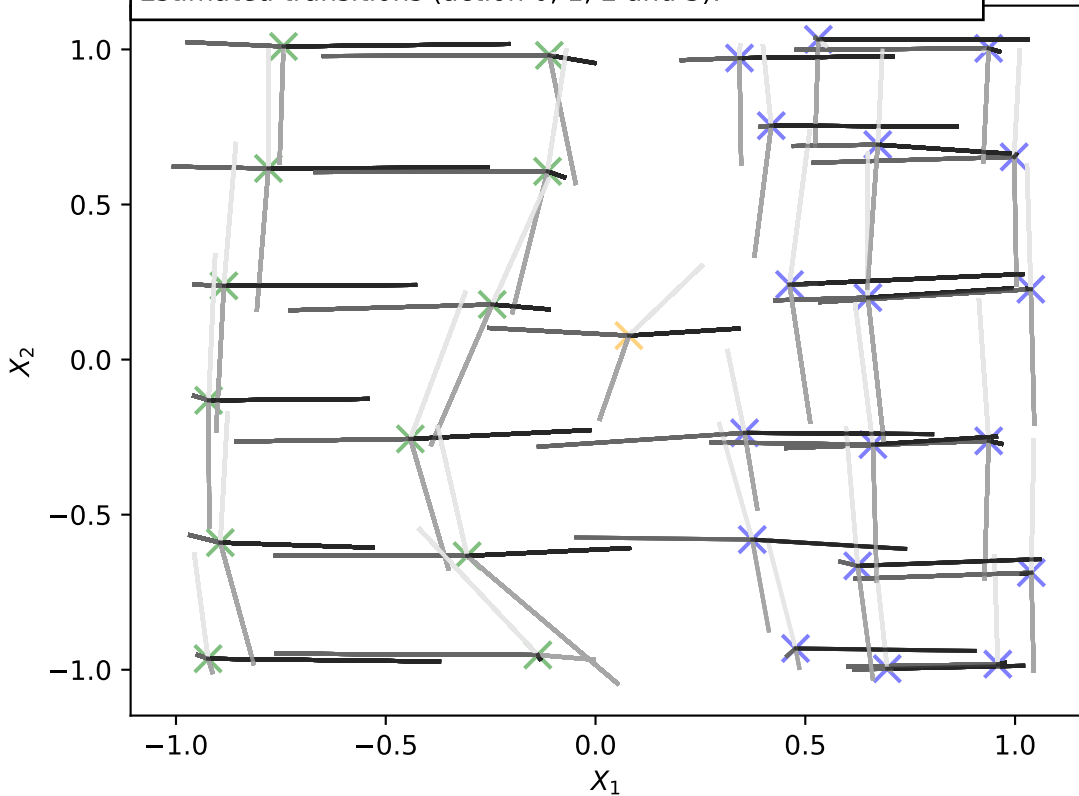

Supplement: supplementary_material [file attachment]

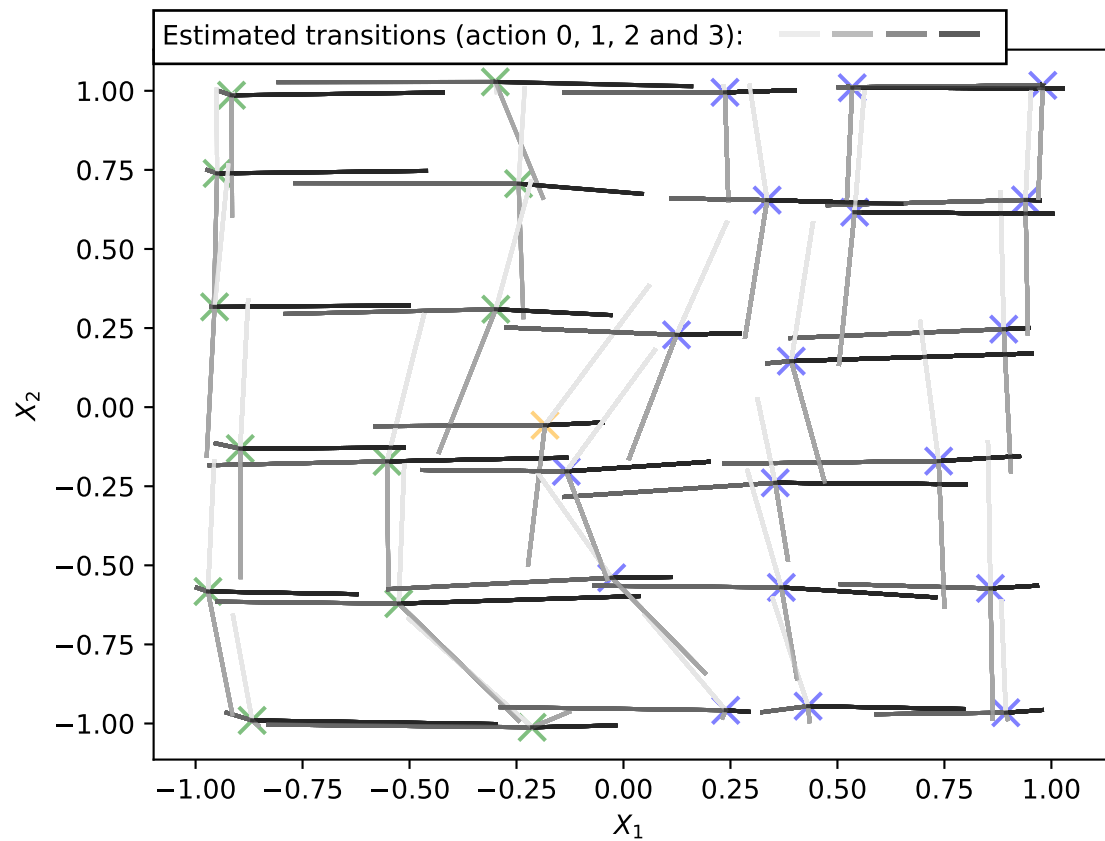

Supplement: supplementary_material [file attachment]

Estimated transitions (action 0, 1, 2 and 3):

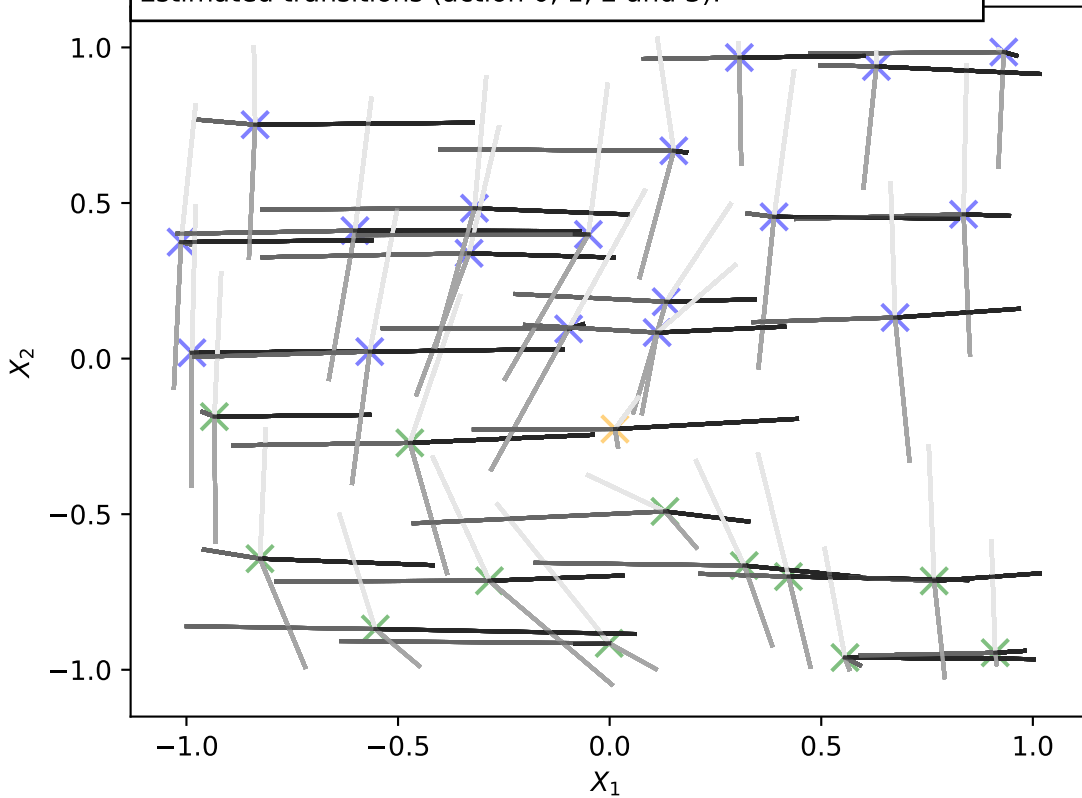

Supplement: supplementary_material [file attachment]

Estimated transitions (action 0, 1, 2 and 3):

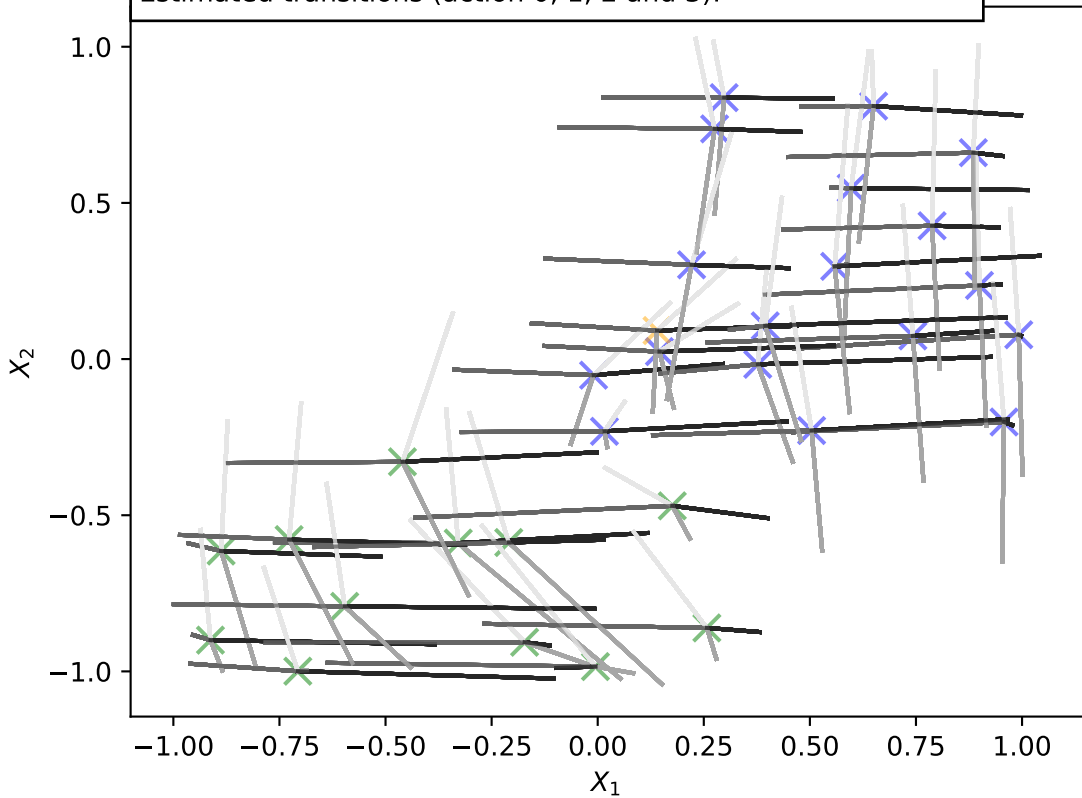

Supplement: supplementary_material [file attachment]

Estimated transitions (action 0, 1, 2 and 3):

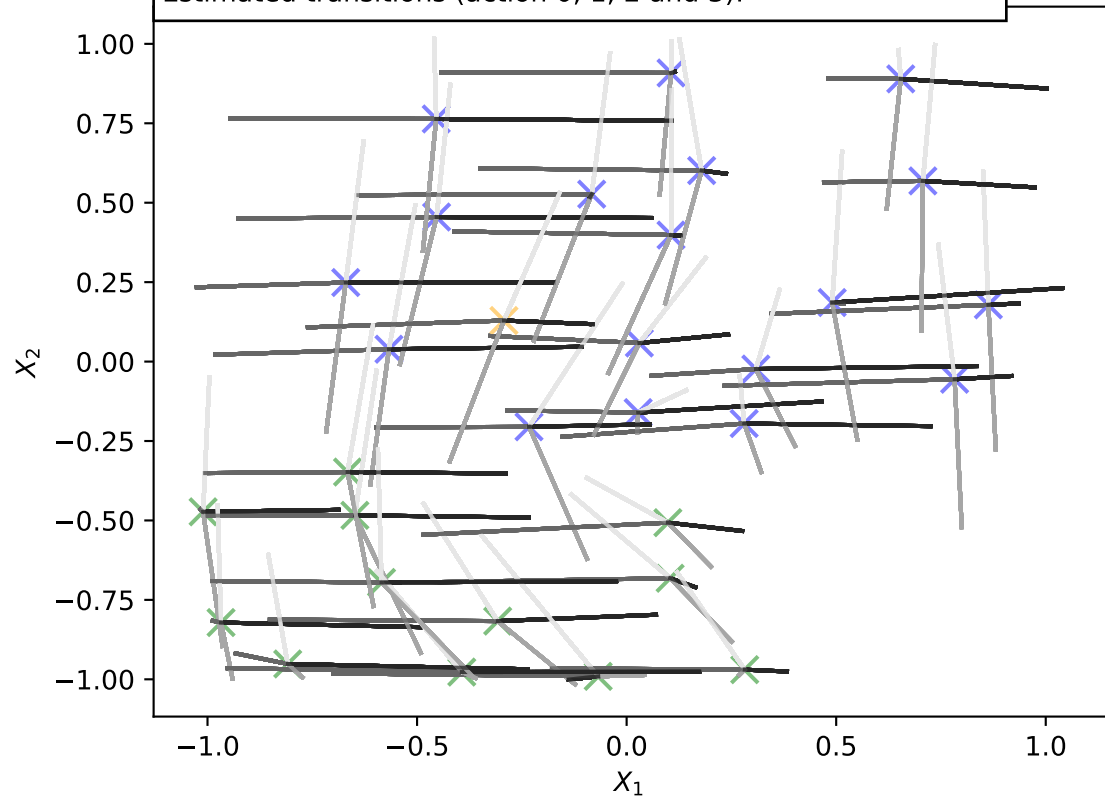

Supplement: supplementary_material [file attachment]

Estimated transitions (action 0, 1, 2 and 3):

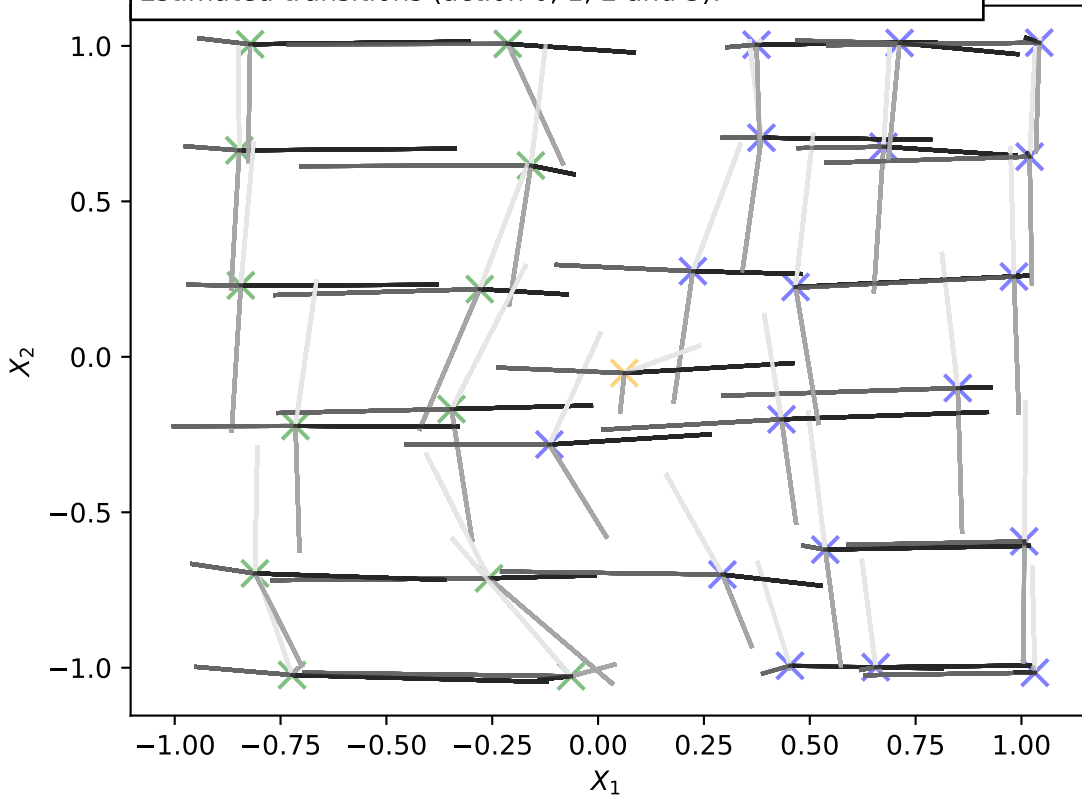

Supplement: supplementary_material [file attachment]

Estimated transitions (action 0, 1, 2 and 3):

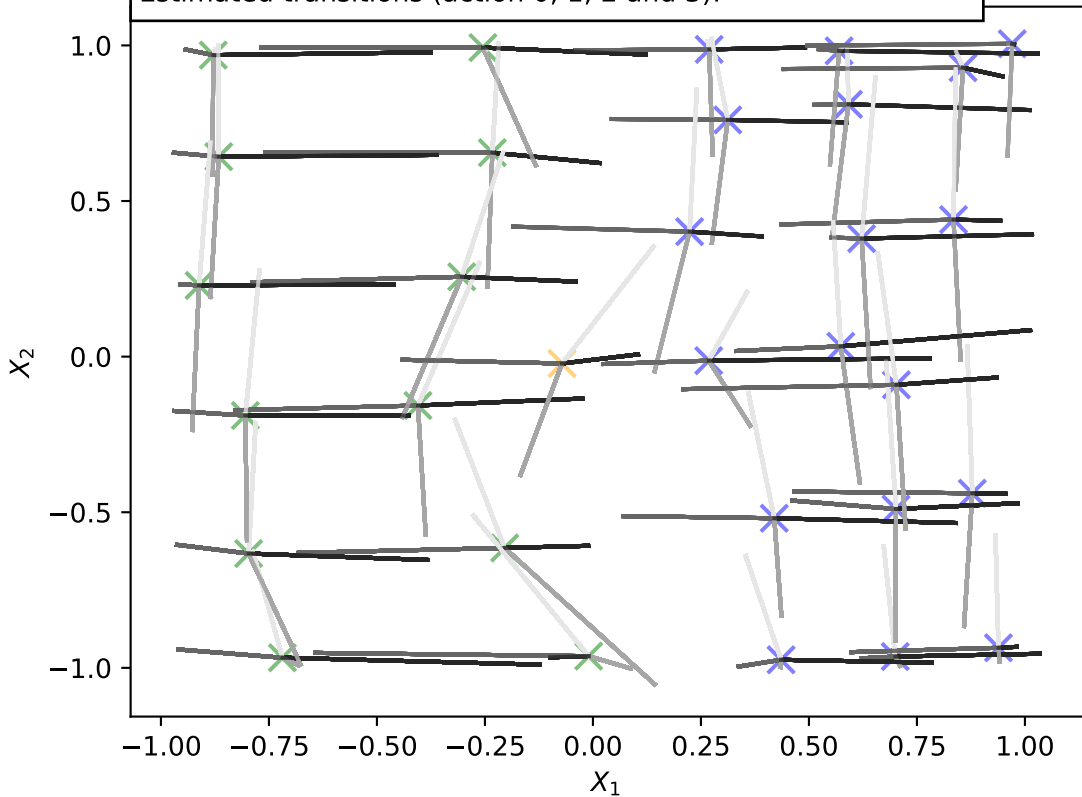

Supplement: supplementary_material [file attachment]

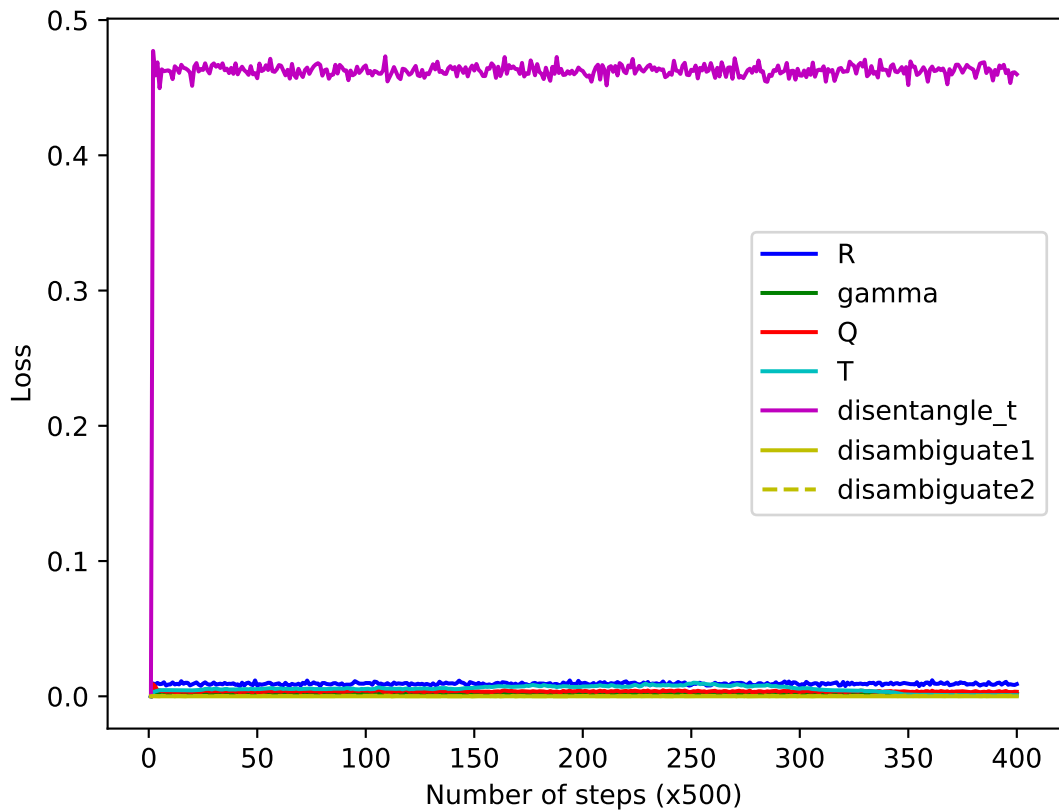

Supplement: supplementary_material [file attachment]

Estimated transitions (action 0, 1, 2 and 3):

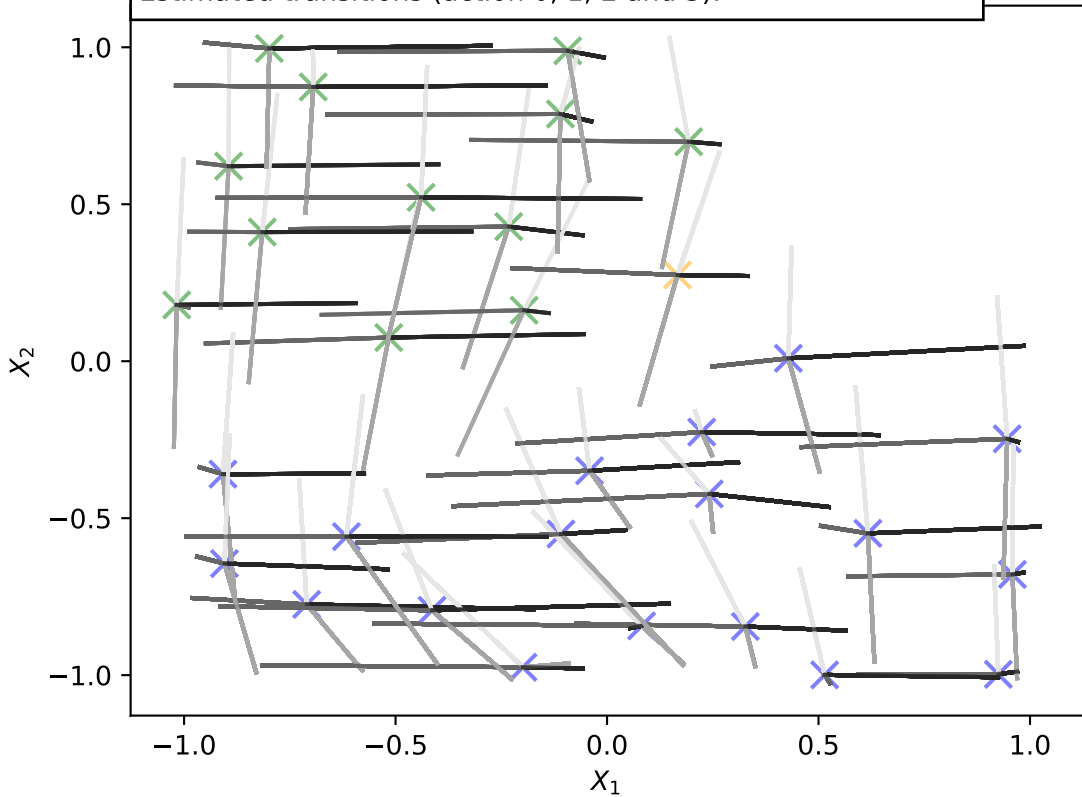

Supplement: supplementary_material [file attachment]

Estimated transitions (action 0, 1, 2 and 3):

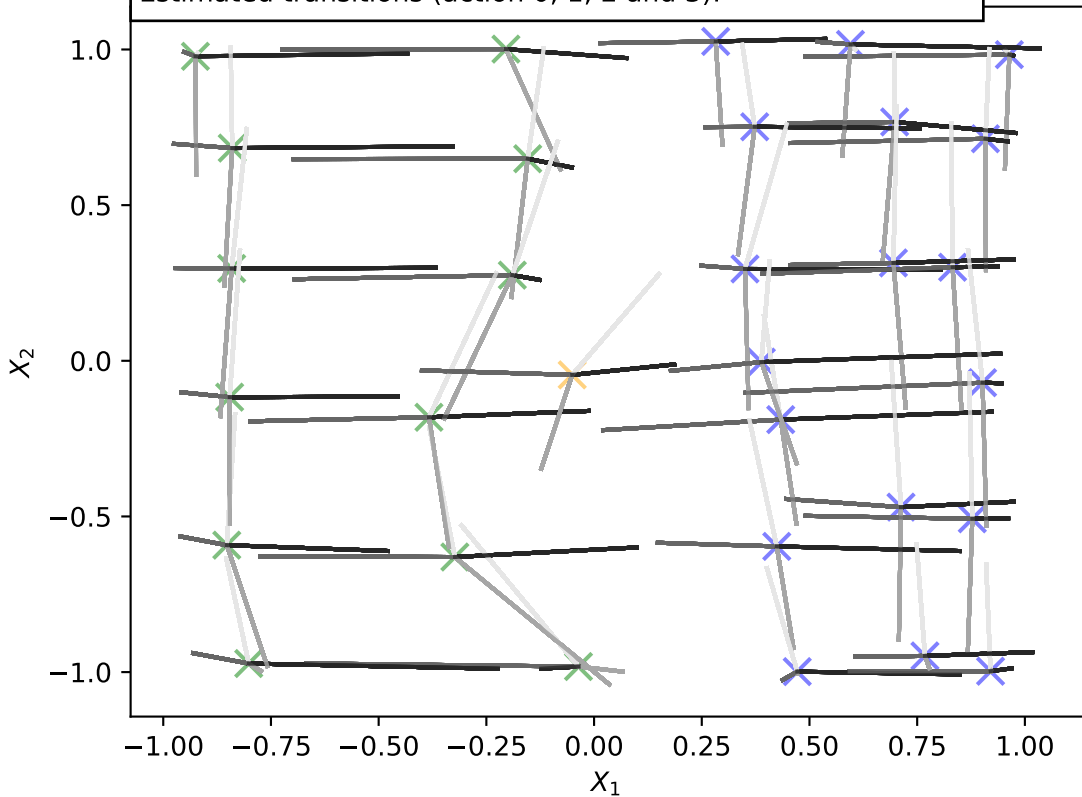

Supplement: supplementary_material [file attachment]

Estimated transitions (action 0, 1, 2 and 3):

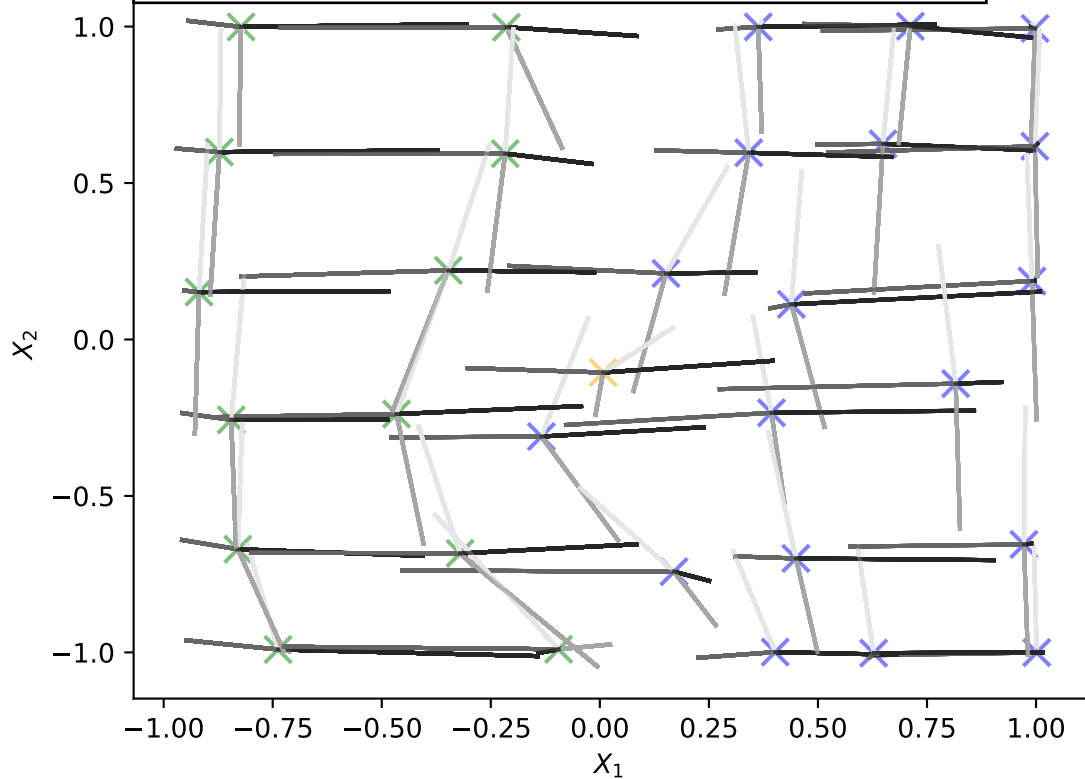

Supplement: supplementary_material [file attachment]

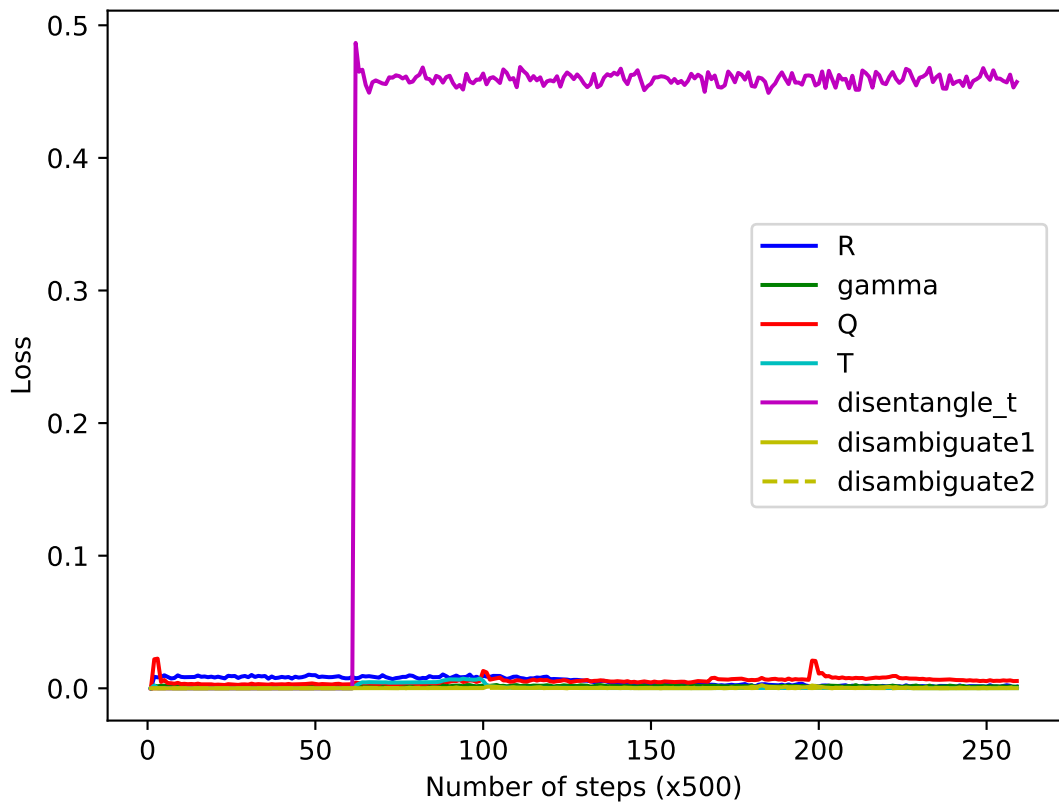

Supplement: supplementary_material [file attachment]

Estimated transitions (action 0, 1, 2 and 3):

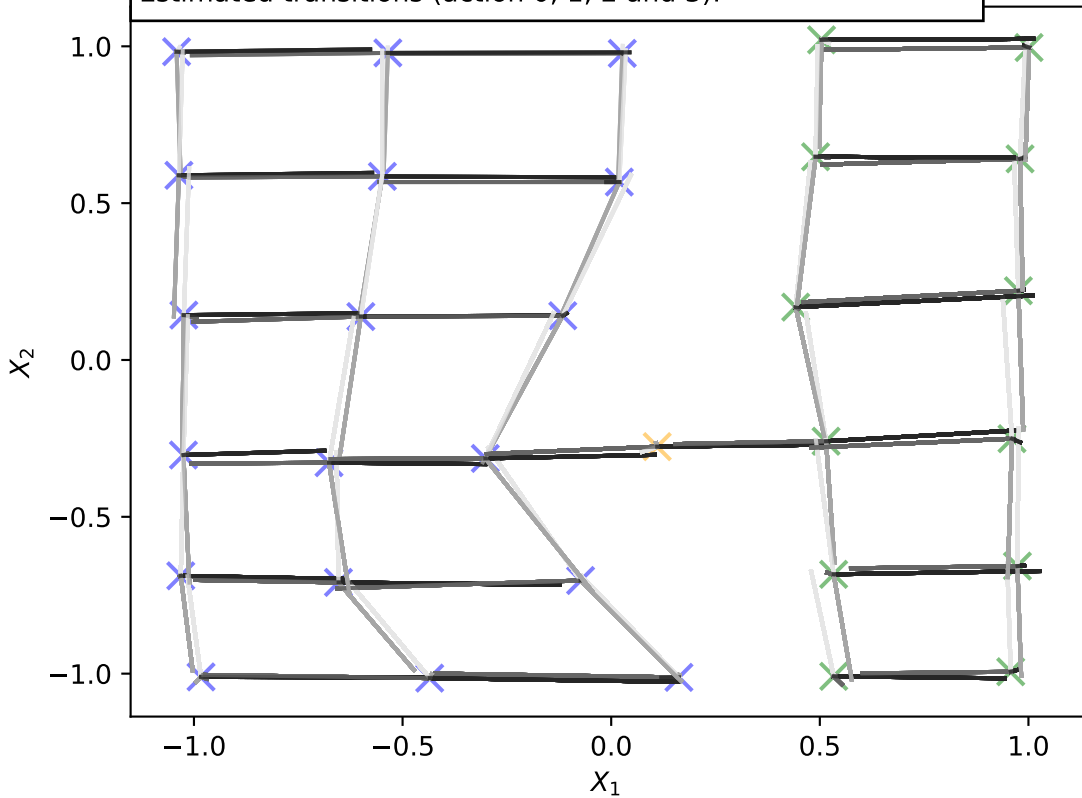

Supplement: supplementary_material [file attachment]

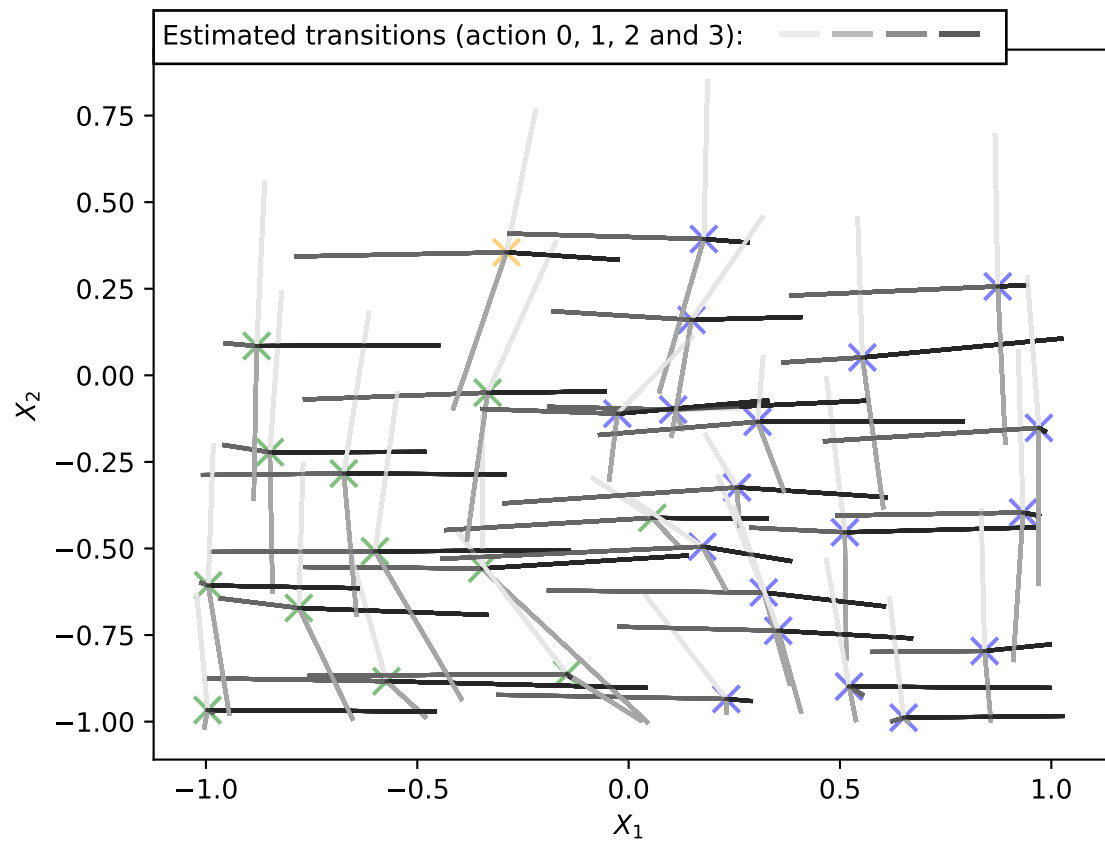

Supplement: supplementary_material [file attachment]

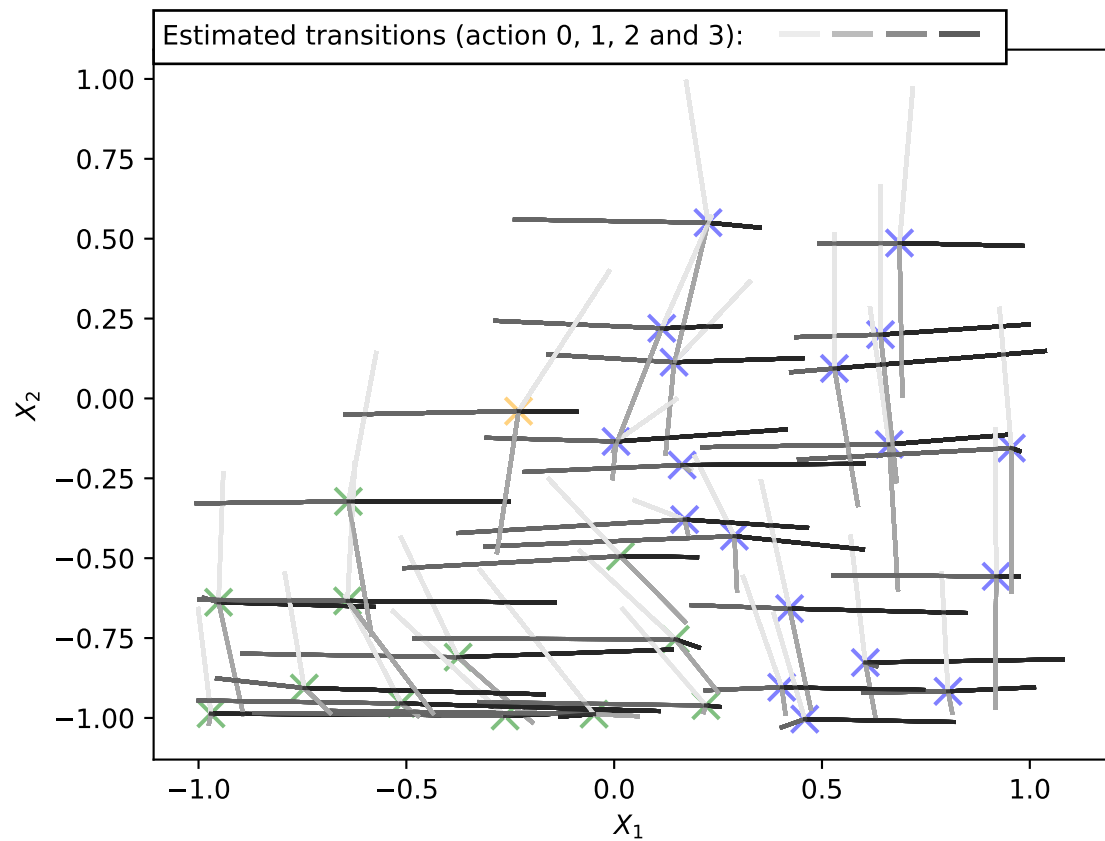

Supplement: supplementary_material [file attachment]

Estimated transitions (action 0, 1, 2 and 3):

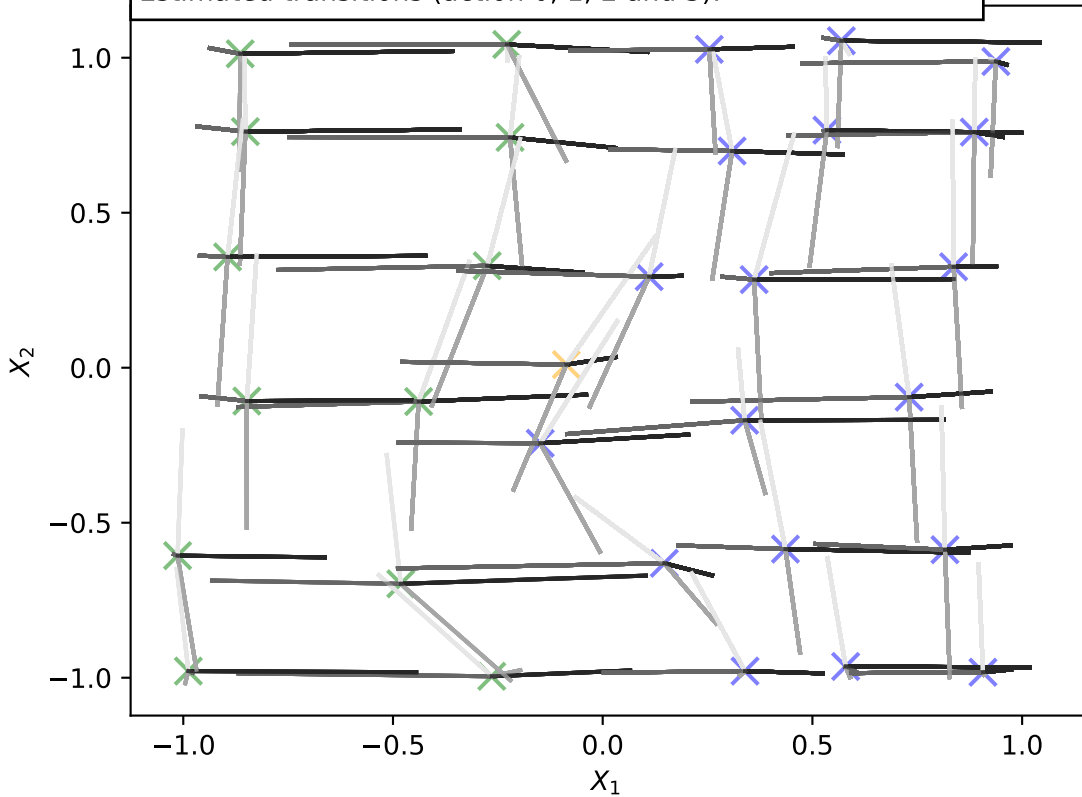

Supplement: supplementary_material [file attachment]

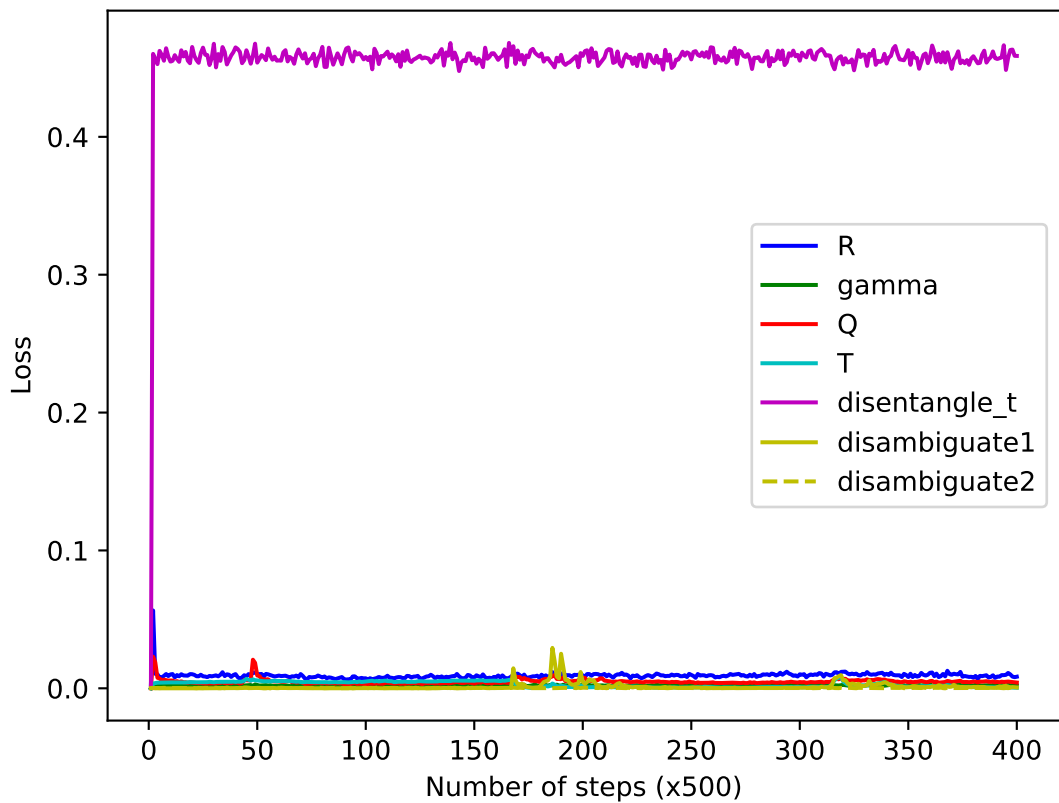

Supplement: supplementary_material [file attachment]

Estimated transitions (action 0, 1, 2 and 3):

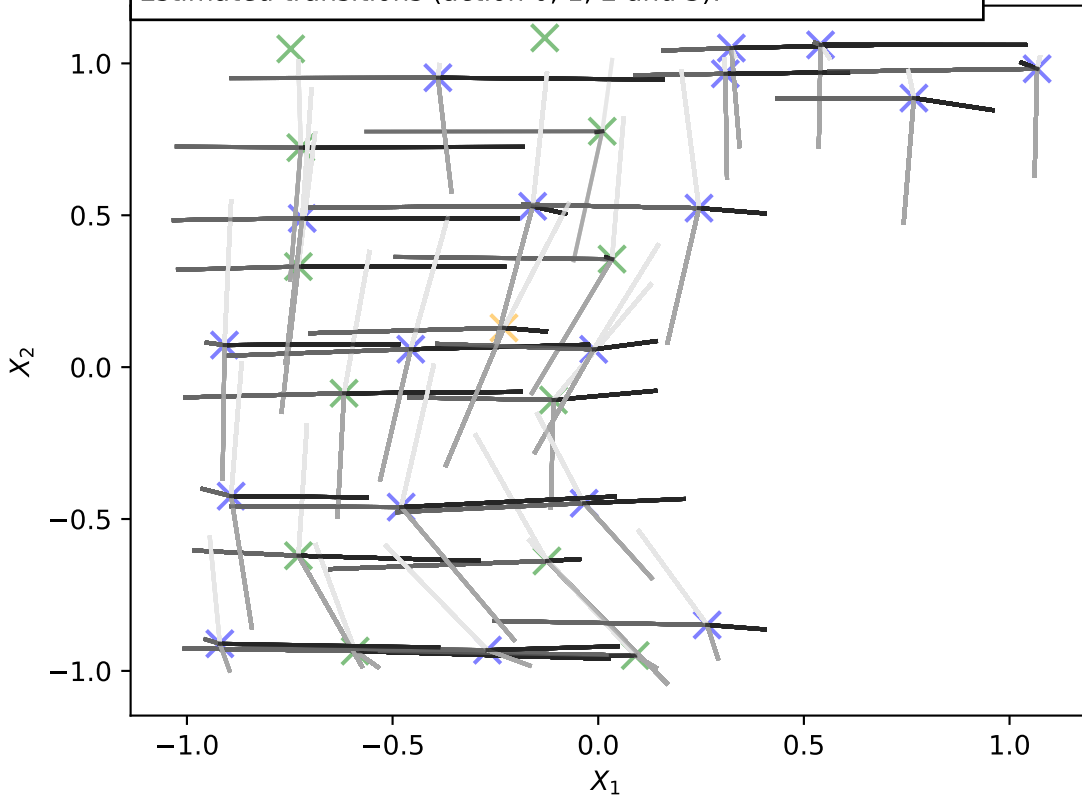

Supplement: supplementary_material [file attachment]

Estimated transitions (action 0, 1, 2 and 3):

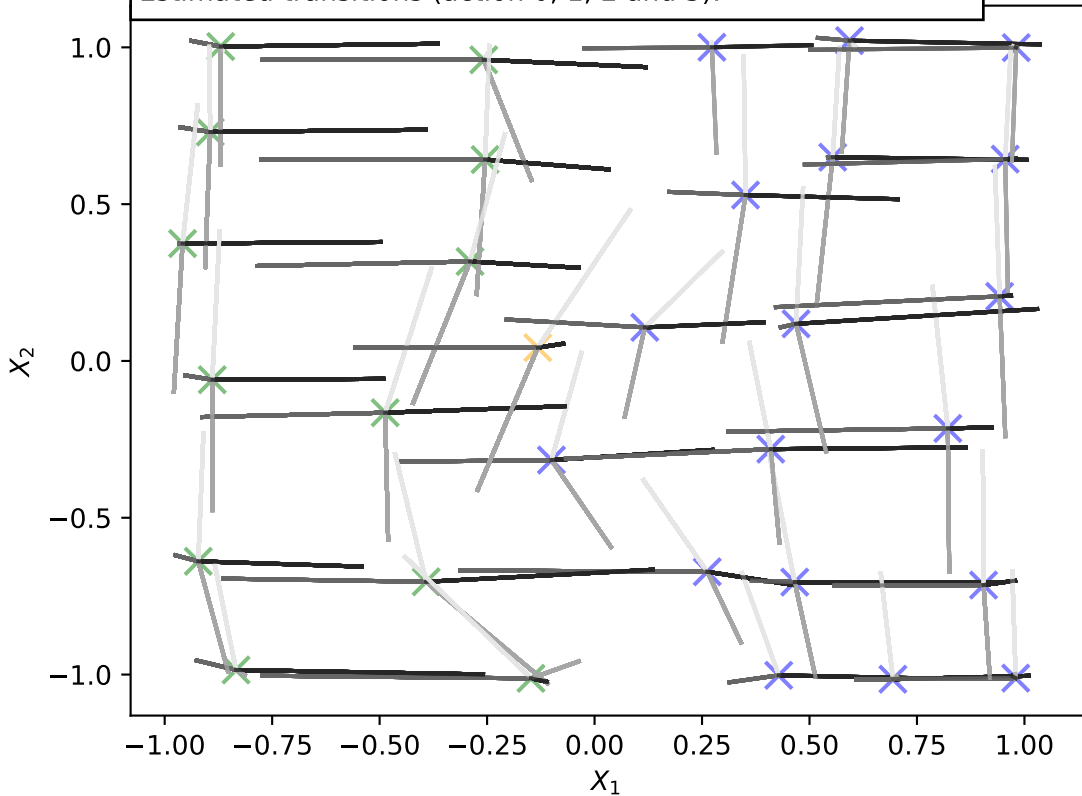

Supplement: supplementary_material [file attachment]

Estimated transitions (action 0, 1, 2 and 3):

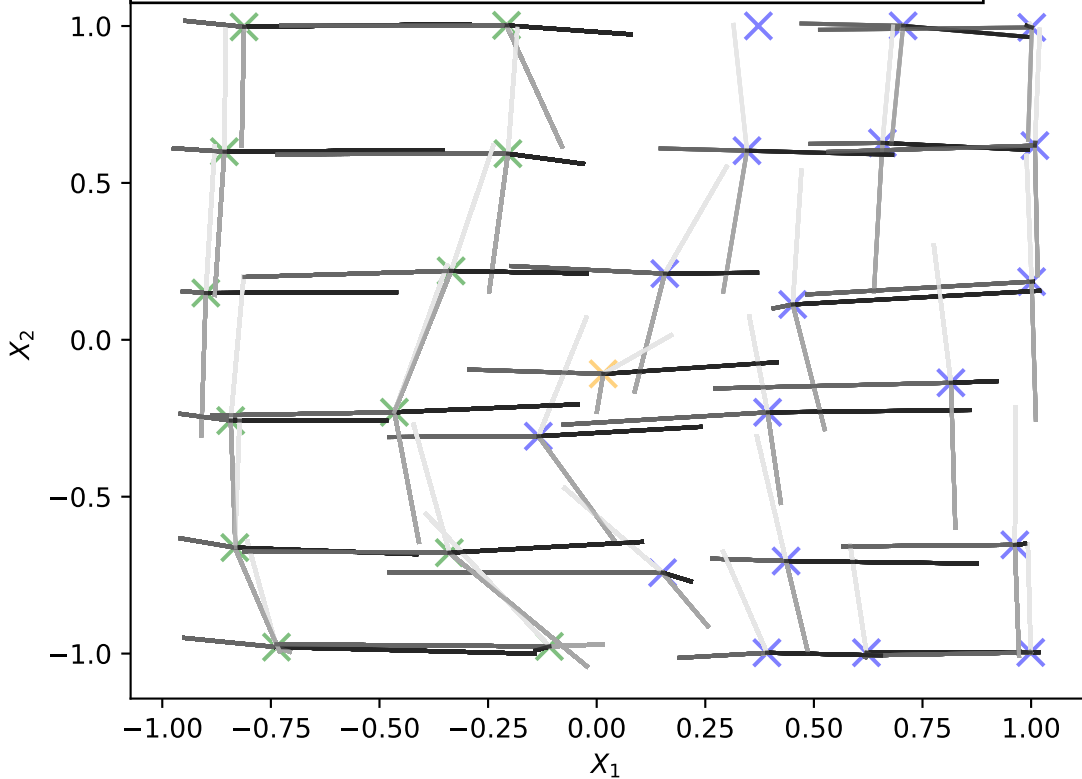

Supplement: supplementary_material [file attachment]

Estimated transitions (action 0, 1, 2 and 3):

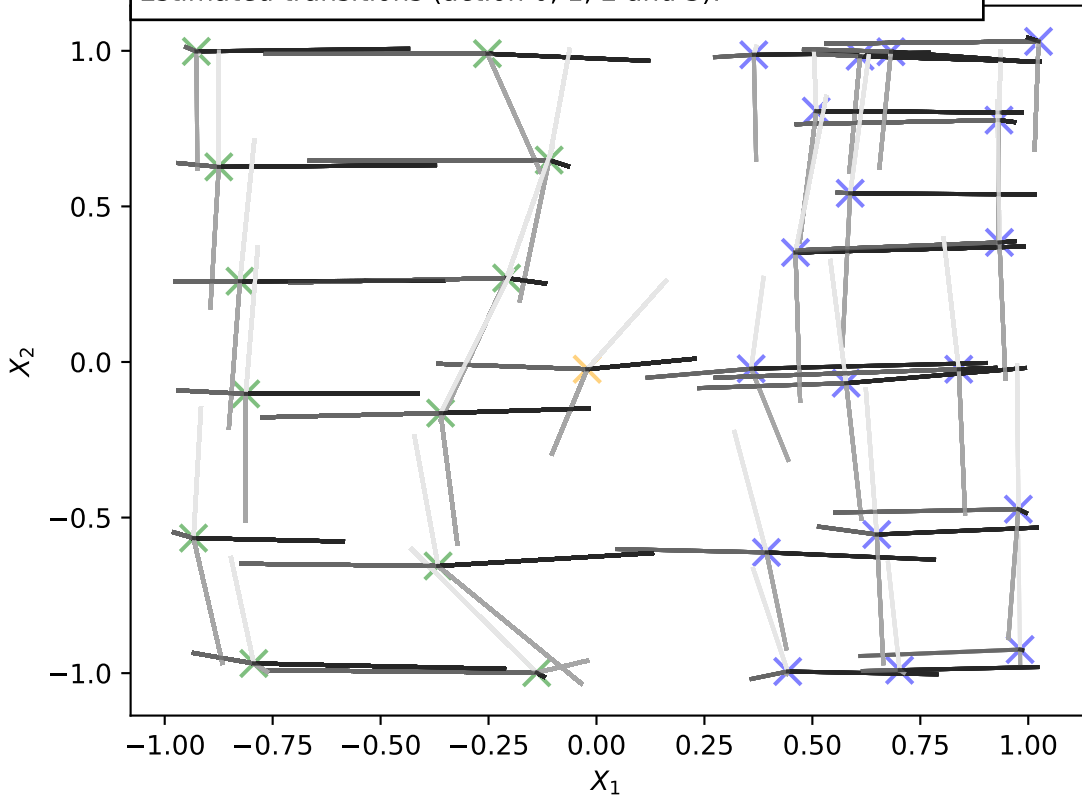

Supplement: supplementary_material [file attachment]

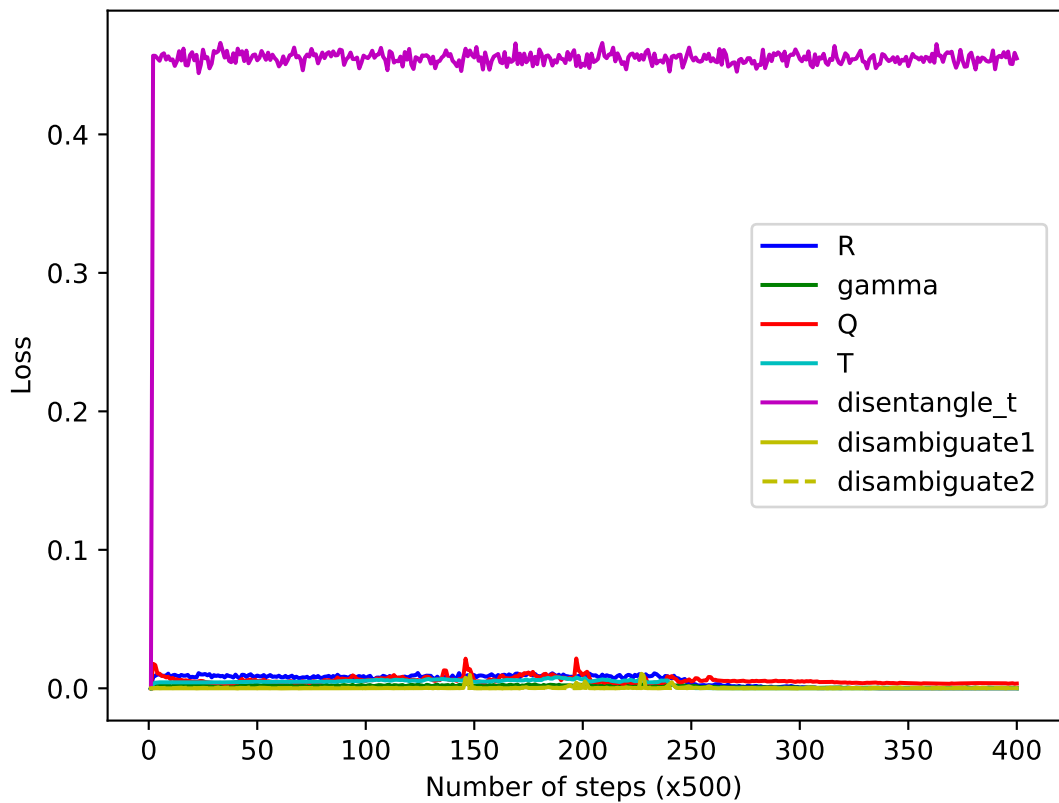

Supplement: supplementary_material [file attachment]

Estimated transitions (action 0, 1, 2 and 3):

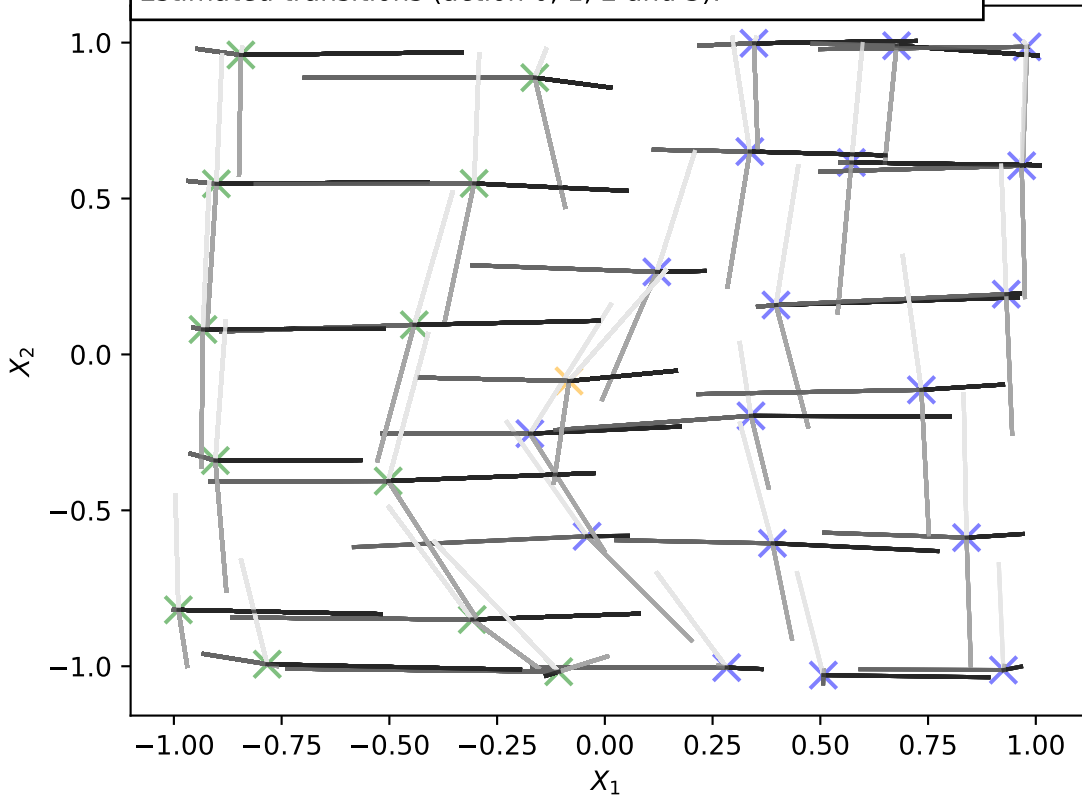

Supplement: supplementary_material [file attachment]

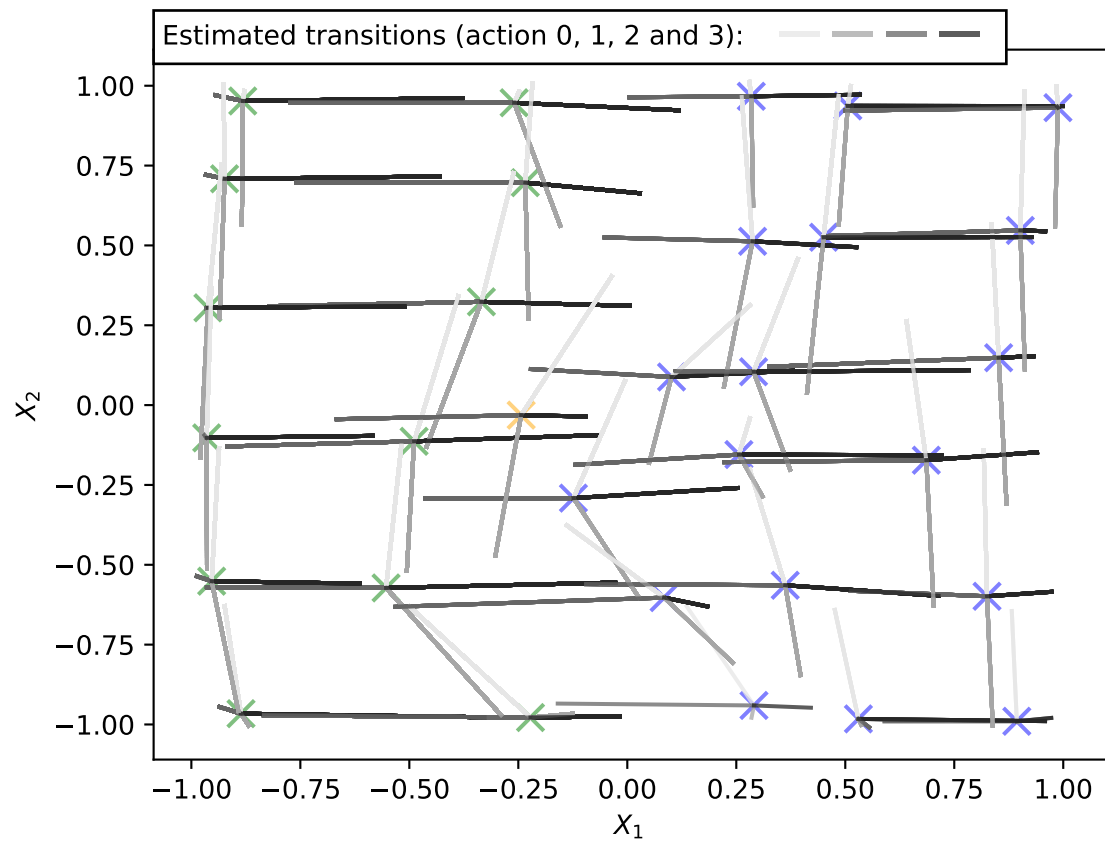

Supplement: supplementary_material [file attachment]

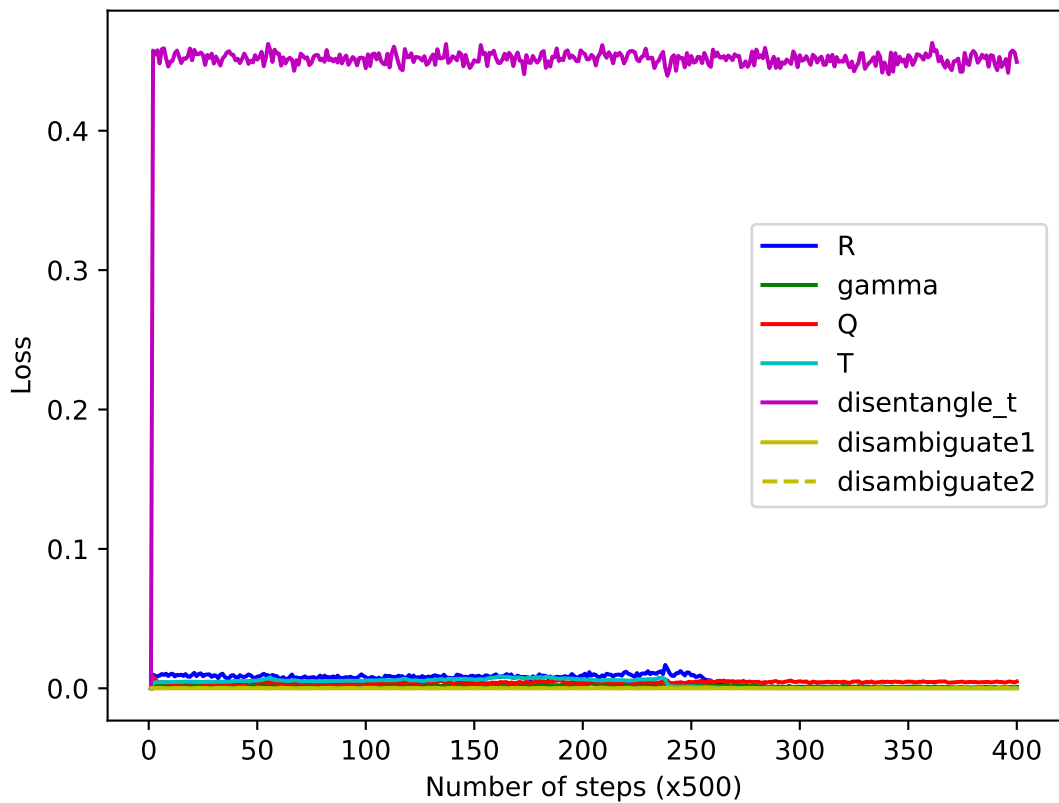

Supplement: supplementary_material [file attachment]

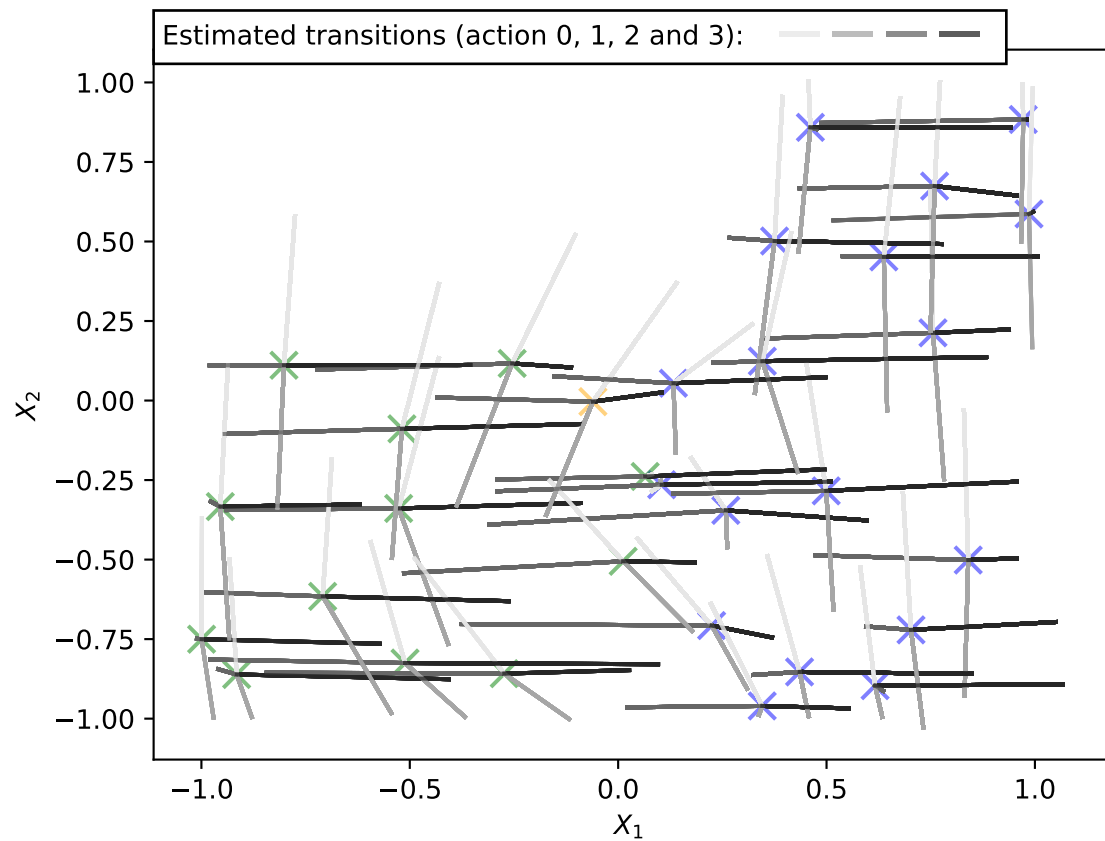

Supplement: supplementary_material [file attachment]

Estimated transitions (action 0, 1, 2 and 3):

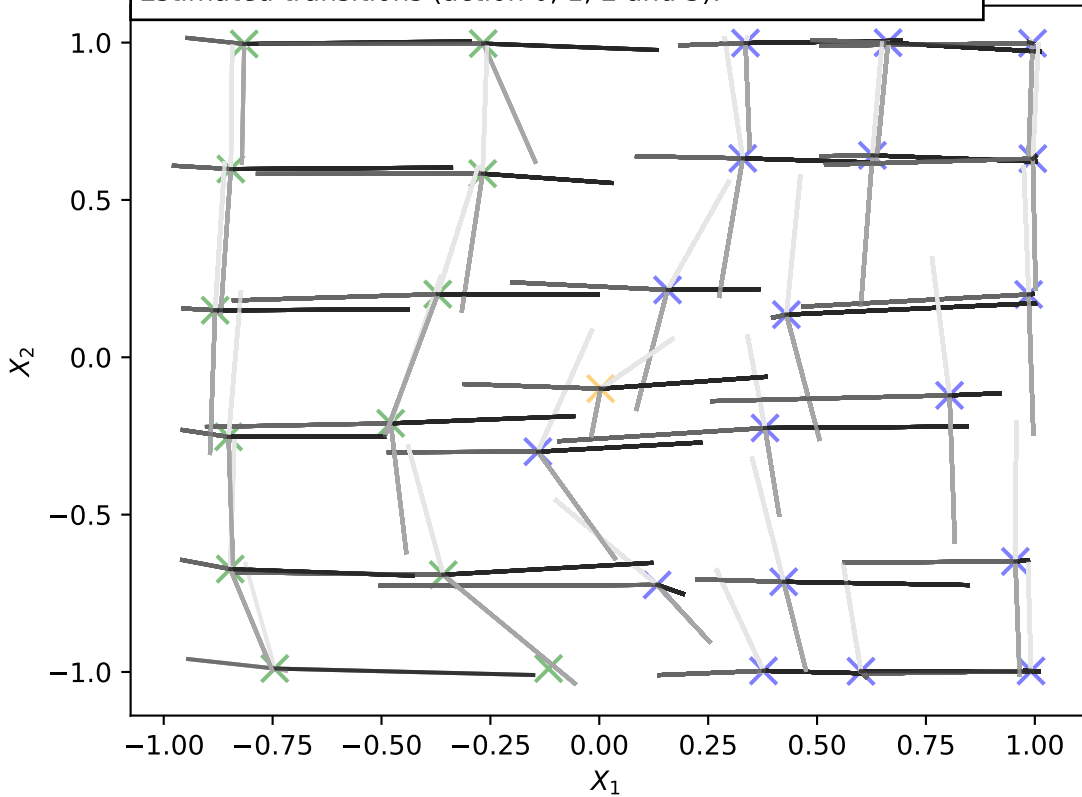

Supplement: supplementary_material [file attachment]

Estimated transitions (action 0, 1, 2 and 3):

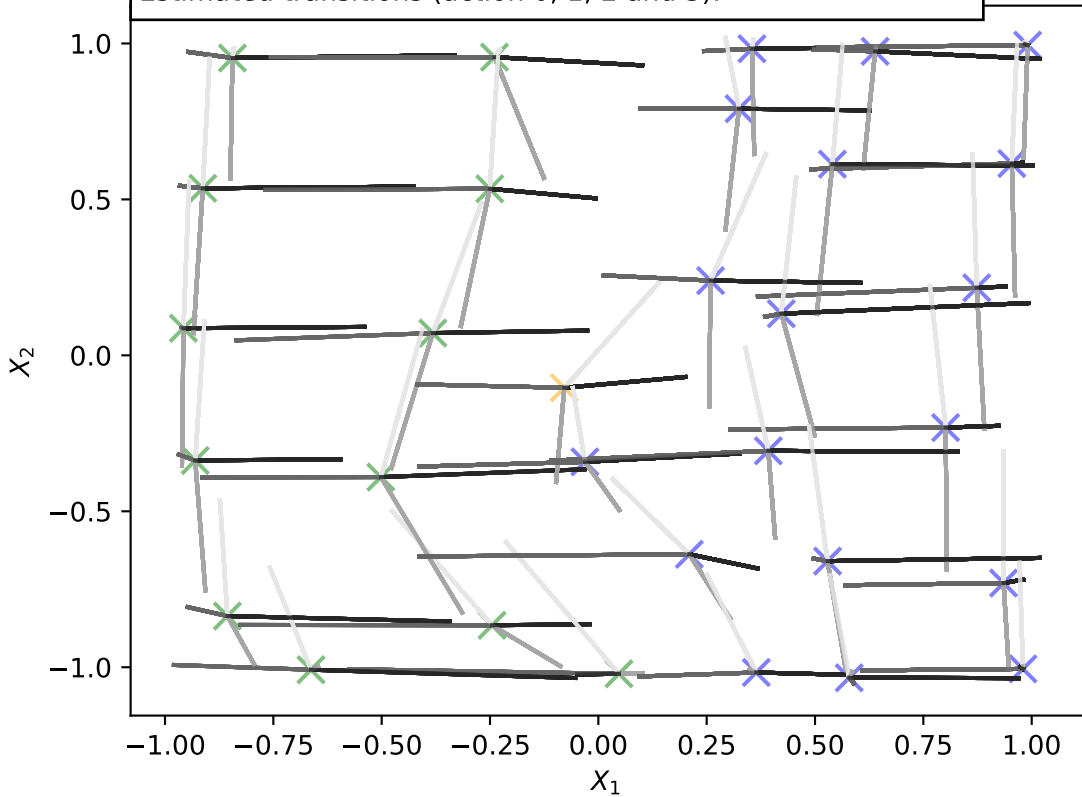

Supplement: supplementary_material [file attachment]

Estimated transitions (action 0, 1, 2 and 3):

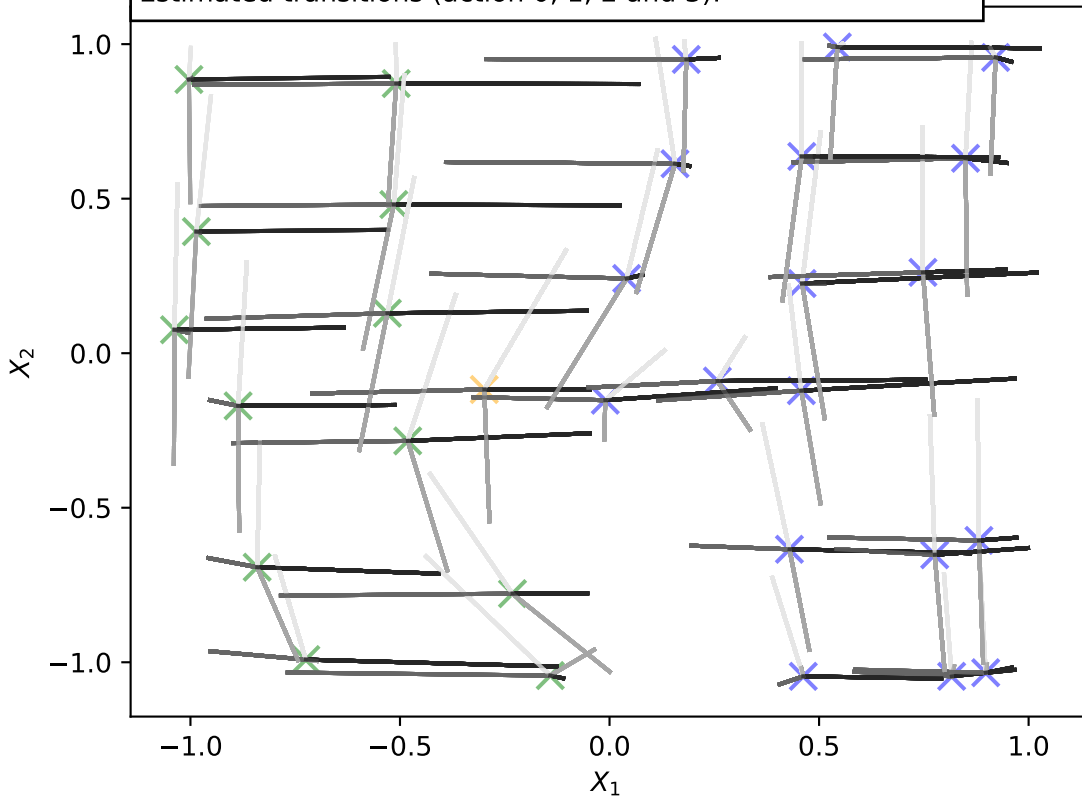

Supplement: supplementary_material [file attachment]

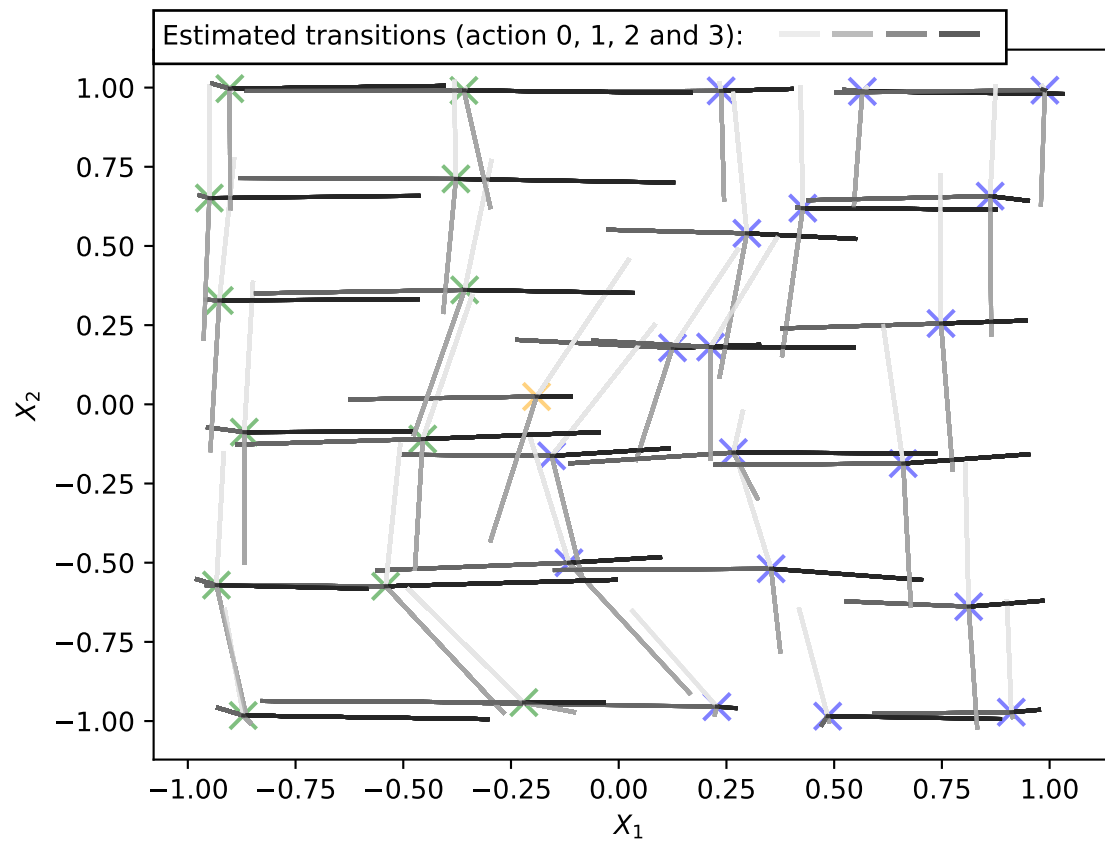

Supplement: supplementary_material [file attachment]

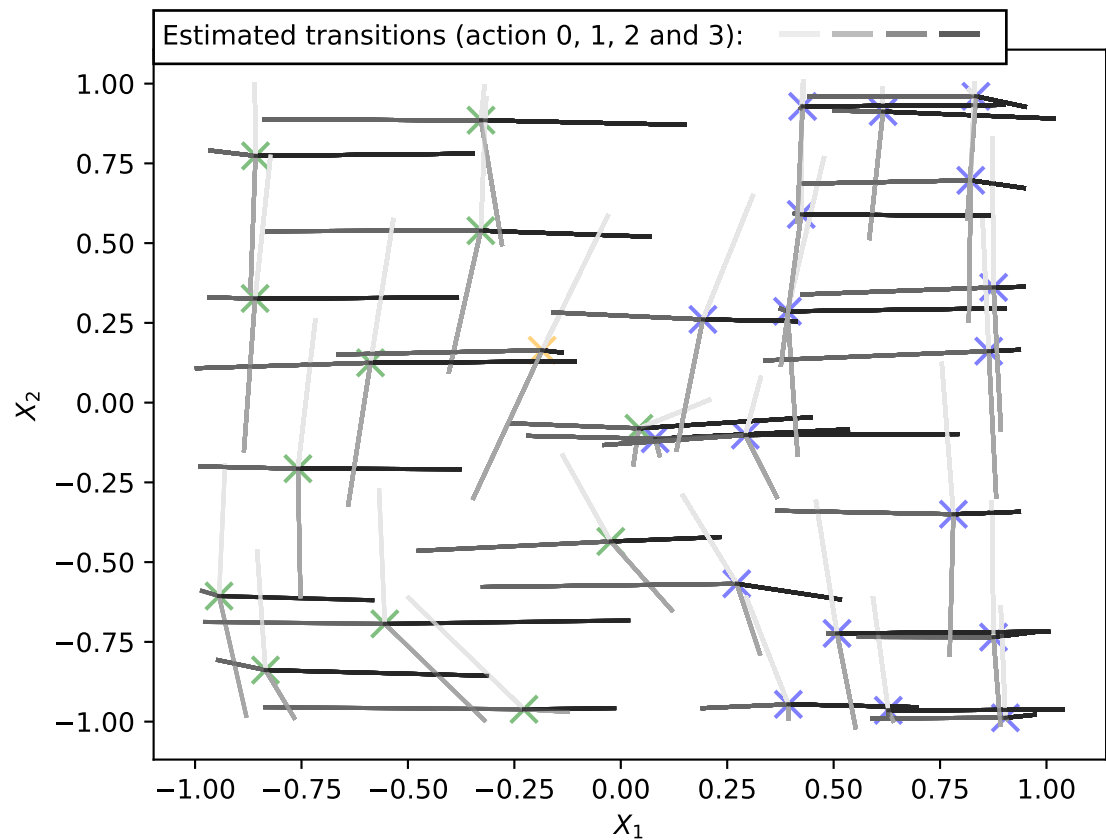

Supplement: supplementary_material [file attachment]

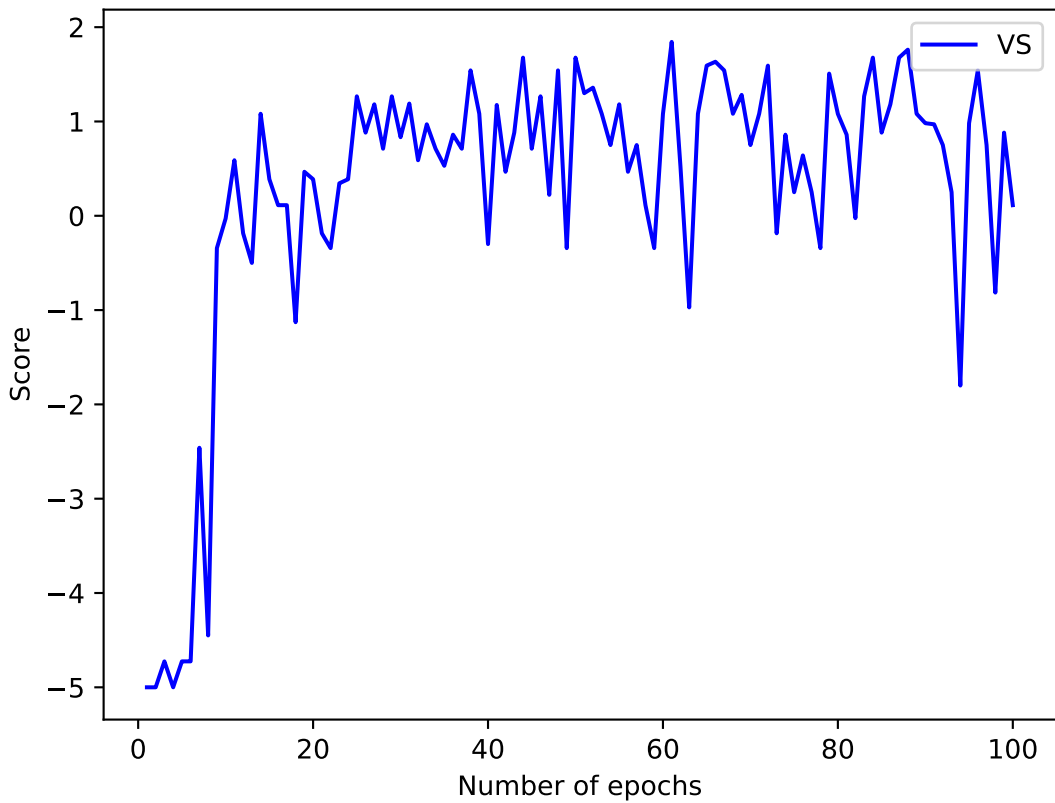

Supplement: supplementary_material [file attachment]

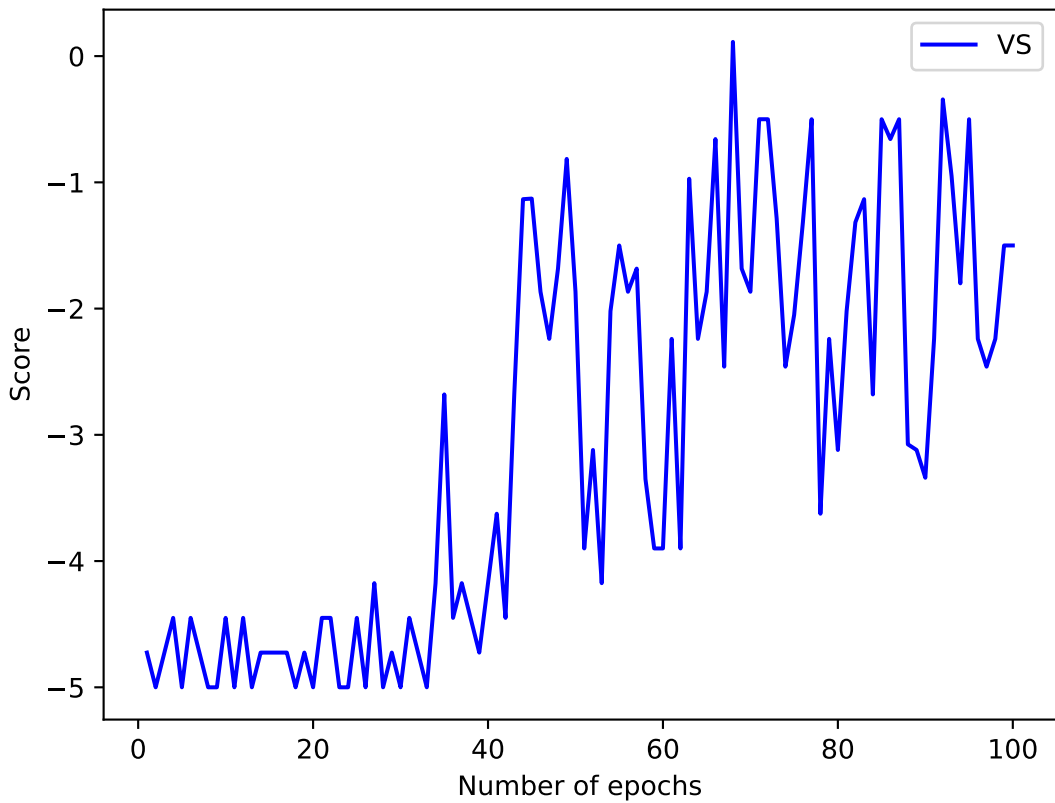

Supplement: supplementary_material [file attachment]

Estimated transitions (action 0, 1, 2 and 3):

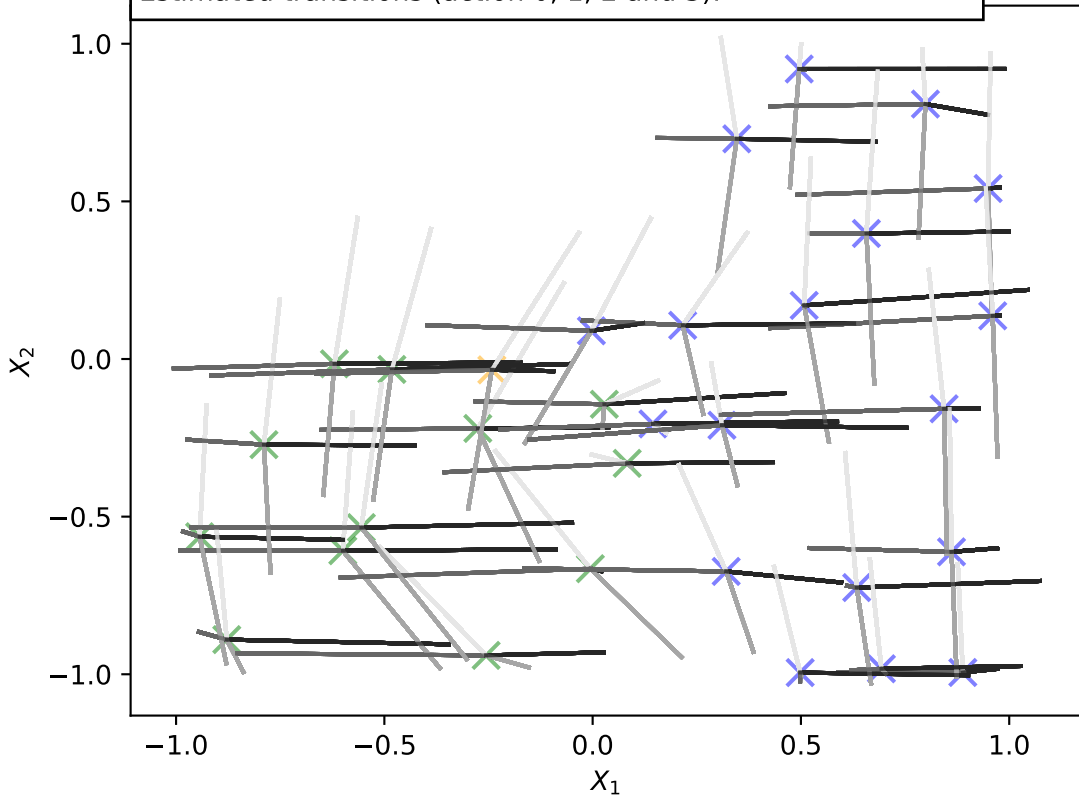

Supplement: supplementary_material [file attachment]

Estimated transitions (action 0, 1, 2 and 3):

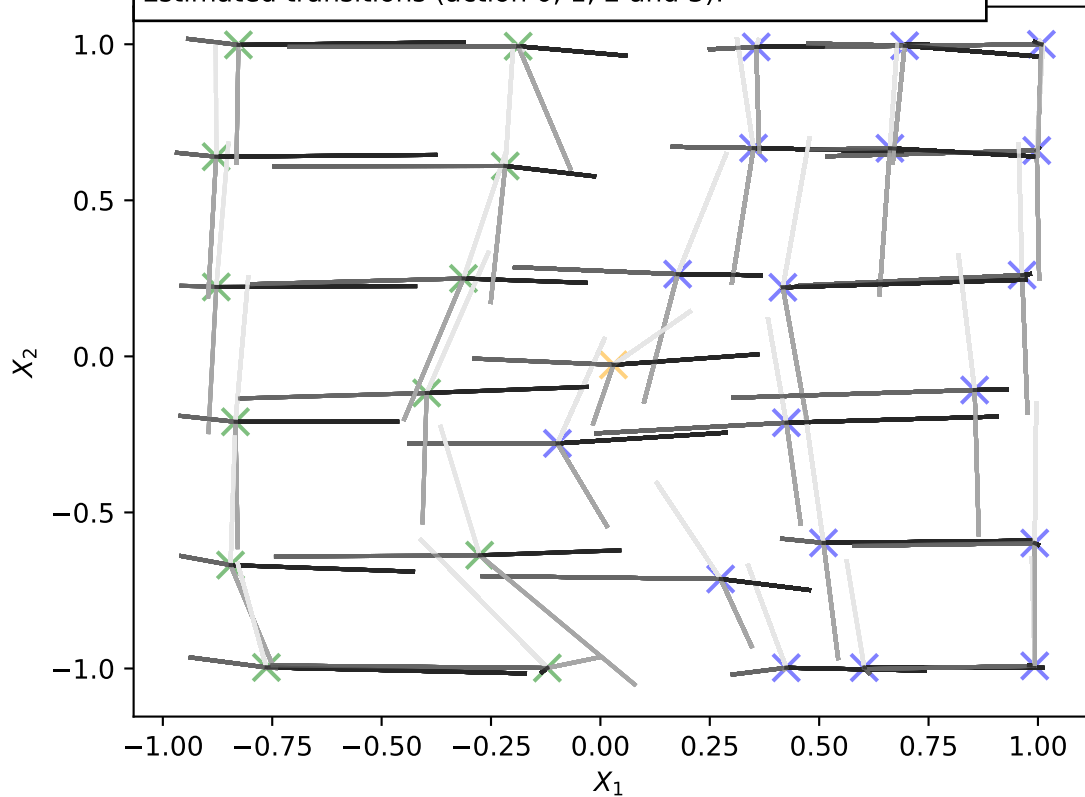

Supplement: supplementary_material [file attachment]

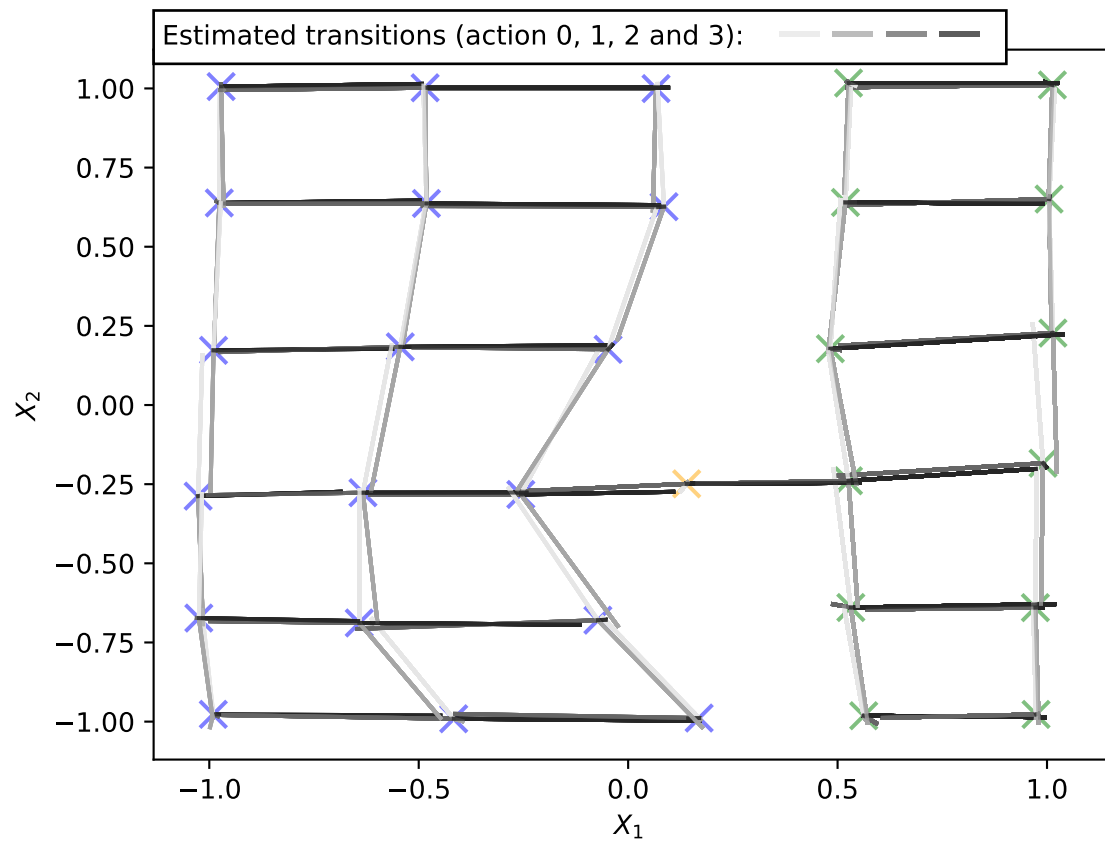

Supplement: supplementary_material [file attachment]

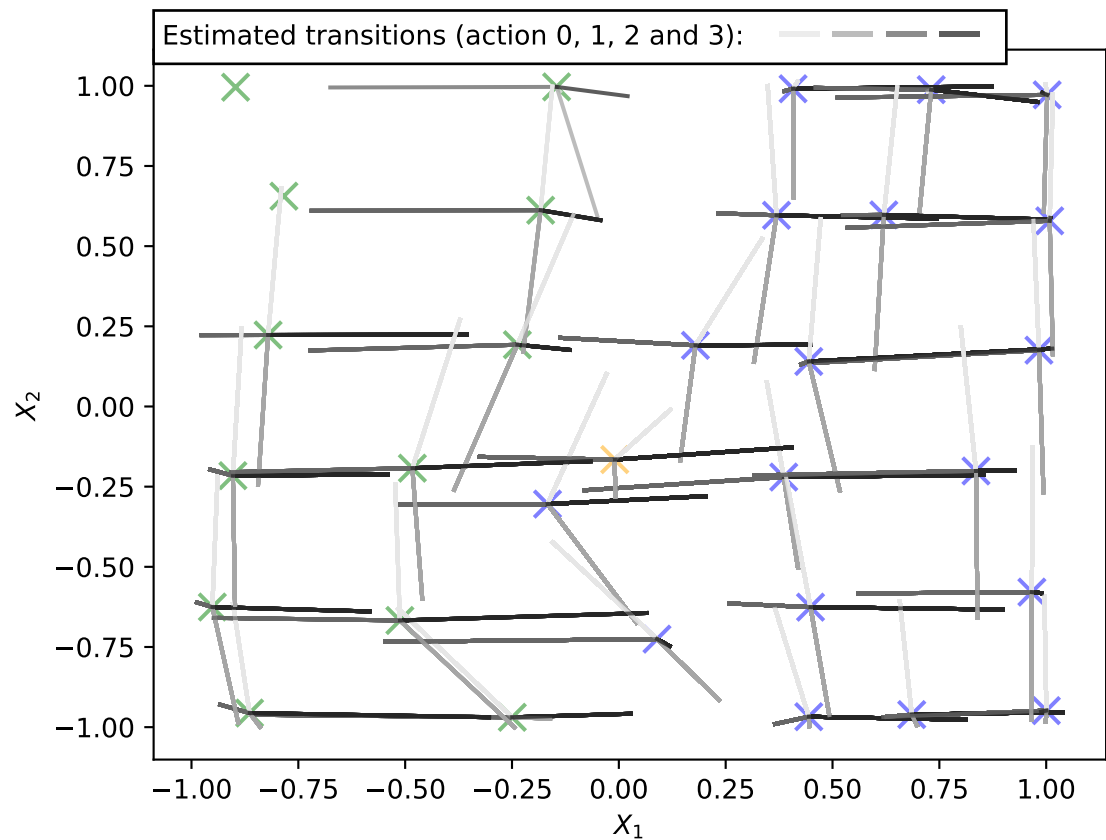

Supplement: supplementary_material [file attachment]
